# Supplementary material for: Novel Risk Classification Based on Pyroptosis-Related Genes Defines Immune Microenvironment and Pharmaceutical Landscape for Hepatocellular Carcinoma
Source: Cancers (Basel). 2022 Jan 17;14(2):447. doi: 10.3390/cancers14020447 (PMC8773536; doi:10.3390/cancers14020447)
Supplement: Supplementary file 1 [file cancers-14-00447-s001.zip › Supplemental Figures.pdf]

Supplemental Material:

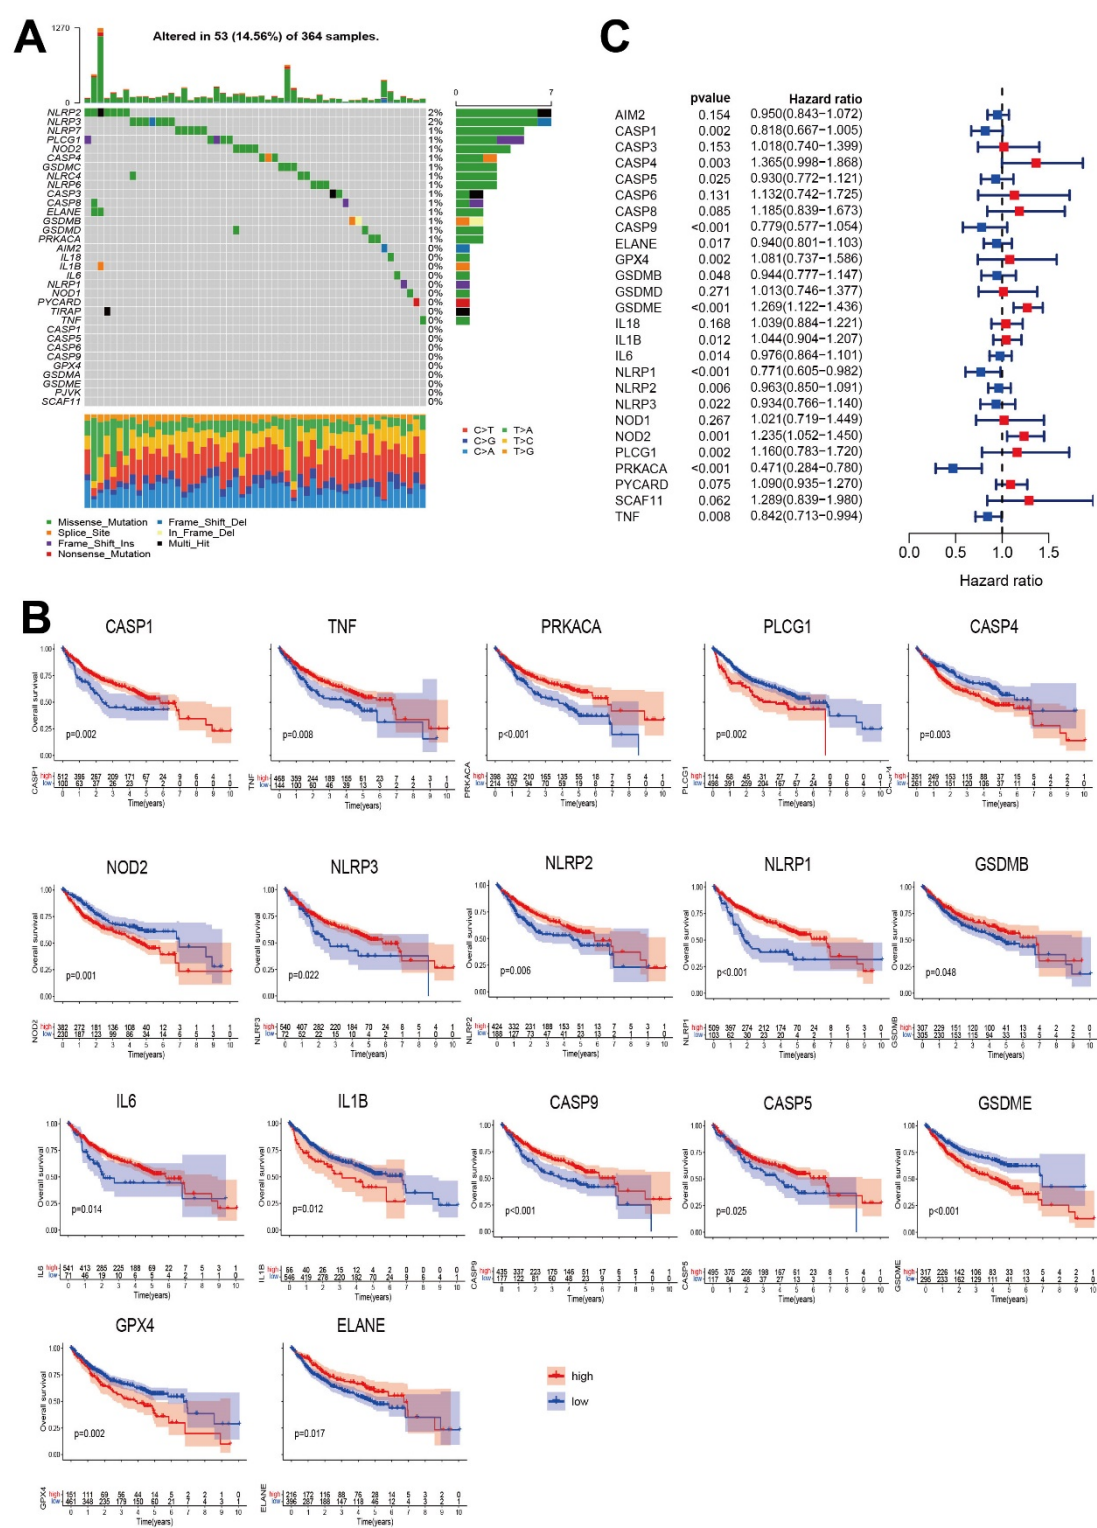

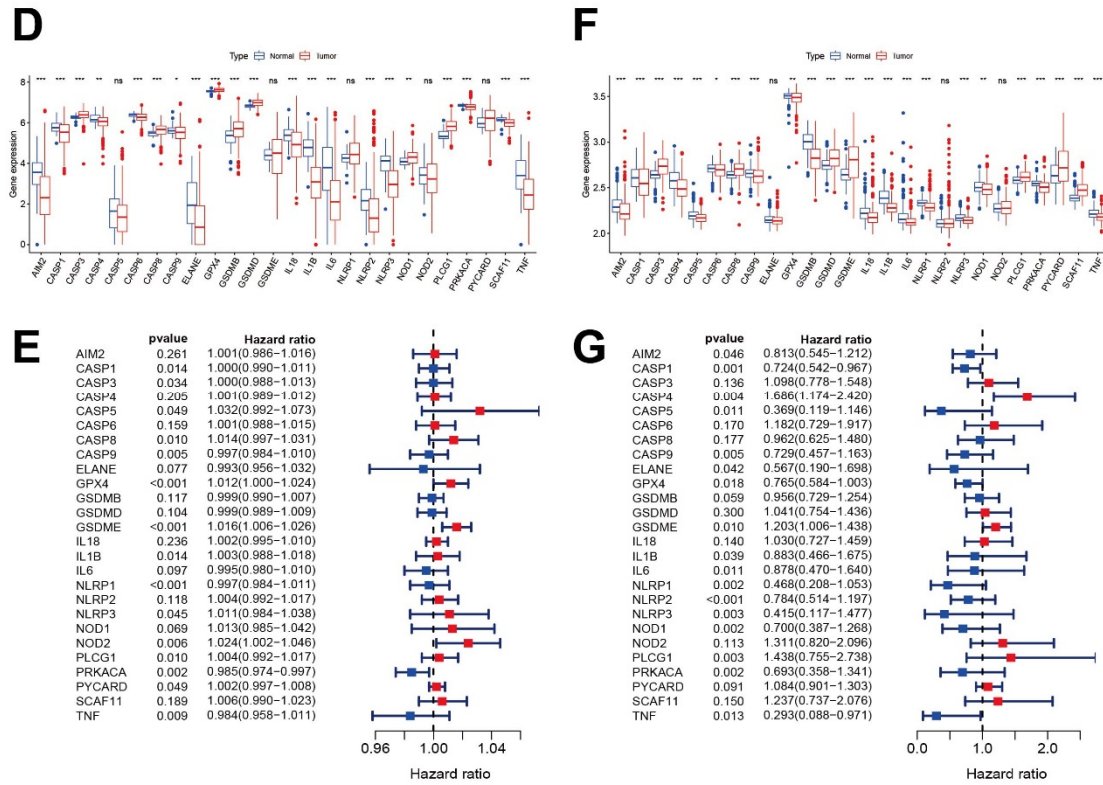

**Figure S1.** General overview of pyroptosis-related genes. (A) Somatic mutation features of each of the pyroptosis genes in TCGA cohort. (B) Kaplan-Meier survival analysis of patients with high- (red) and low- (blue) expression for each pyroptosis-related gene in all patients with clinical information available. CASP1, TNF, PRKACA, PLCG1, CASP4, NOD2, NLRP3, NLRP2, NLRP1, GSDMB, IL-6, IL-1B, CASP9, CASP5, GSDME, GPX4, ELANE (all  $p < 0.05$ ). (C) Forest plots based on the results of Kaplan-Meier analysis between gene expression level and overall survival in integrated dataset; Separated analyses of pyroptosis genes, (D,F) Gene expression distributions of pyroptosis genes in normal (blue) and tumor (red) samples. (E,G) Forest plots based on the results of Kaplan-Meier analysis between gene expression level and overall survival in separated dataset; (D,E) TCGA-LIHC; (F,G) GSE14520.

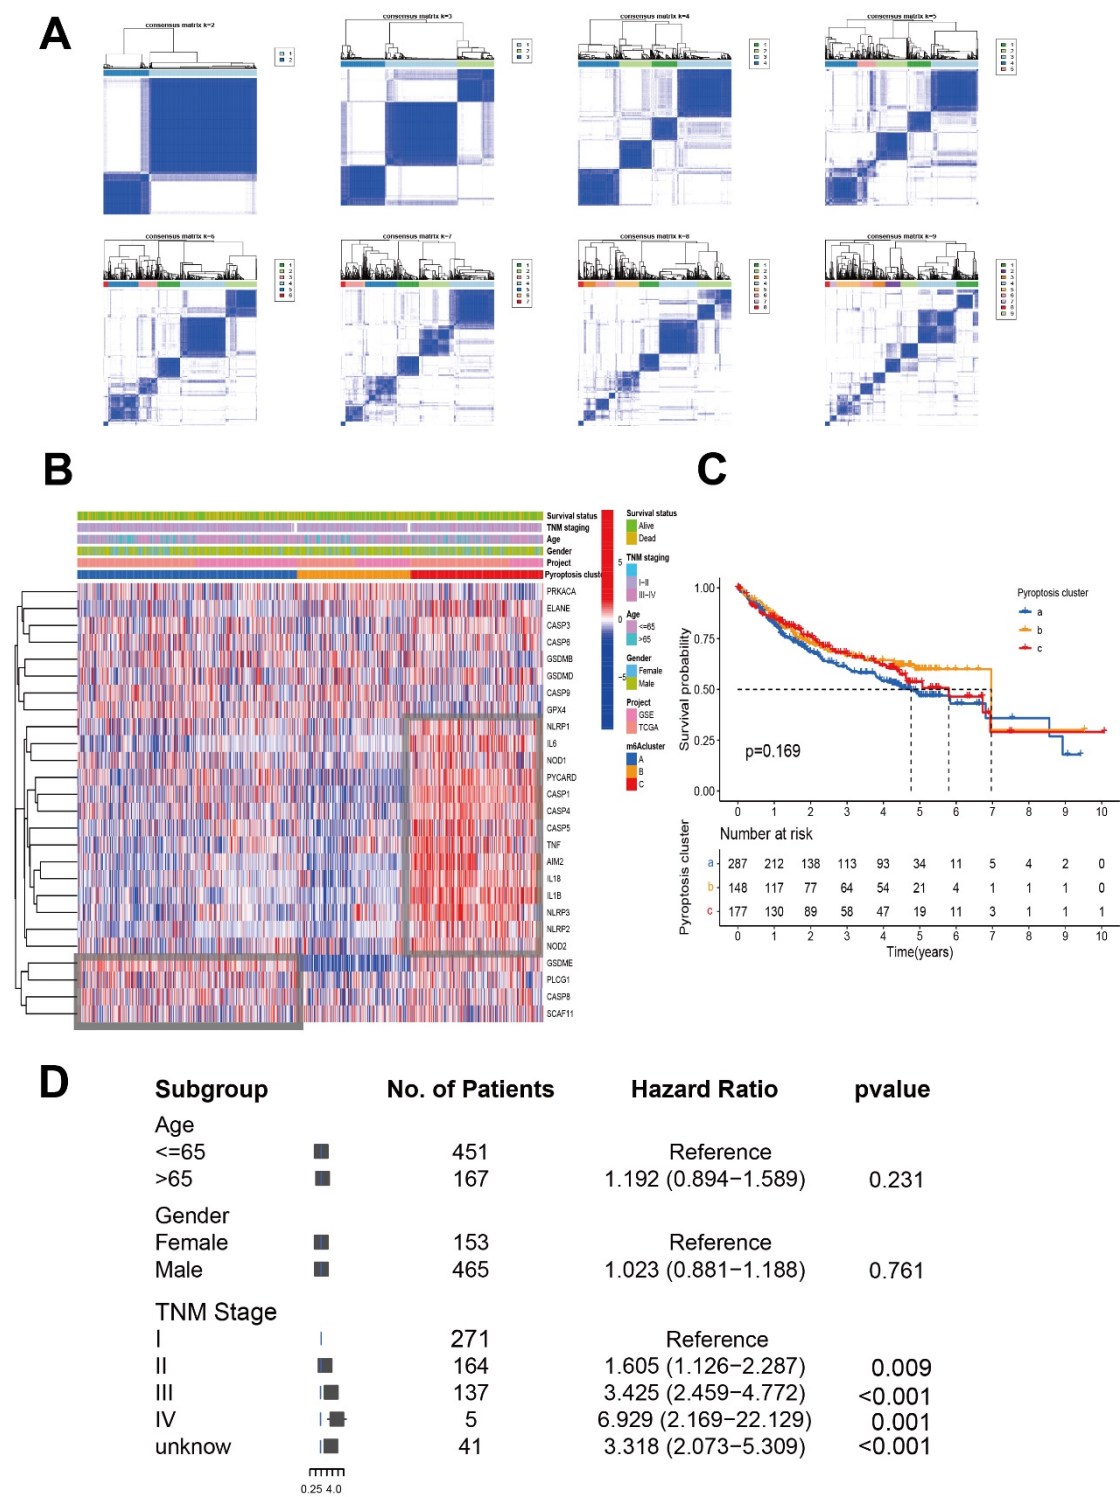

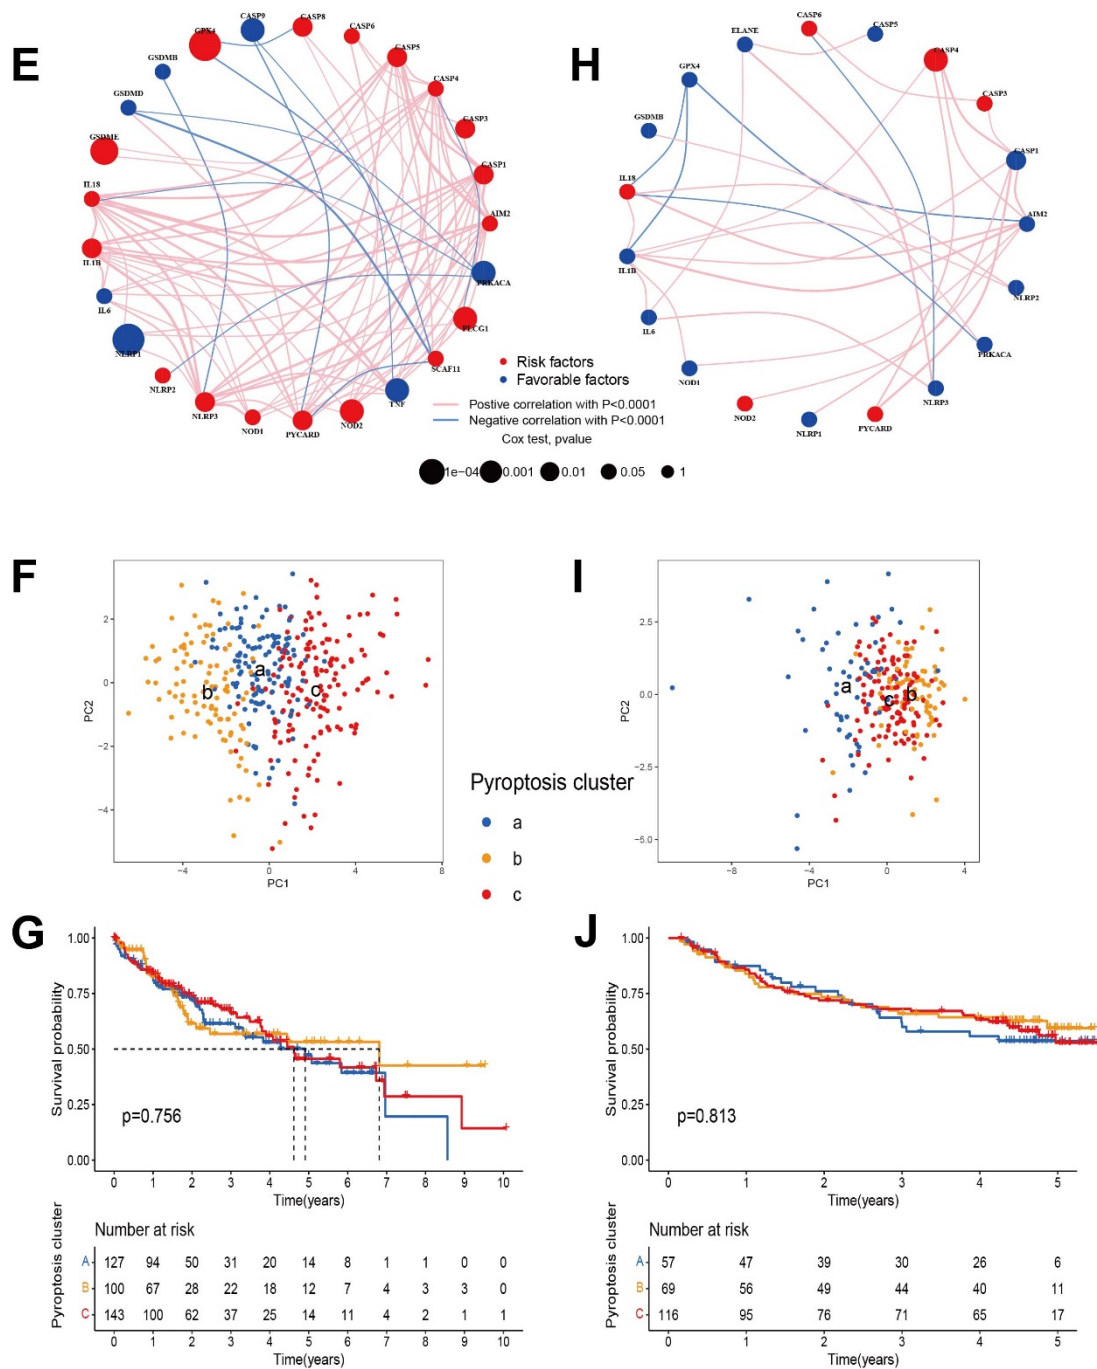

**Figure S2.** Characteristics of pyroptosis patterns. (A) the consensus distributions for  $k$  (2 to 9) based on pyroptosis genes. (B) Unsupervised clustering of pyroptosis genes. The clusters of clinical characteristics and pyroptosis patterns were used as sample annotations (red represents high expression level; blue, low level). (C) Overall survival analysis of pyroptosis clusters a (blue), b (yellow) and c (red). (D) Subgroup analysis estimating clinical prognostic value of patients' age, gender, and cancer stage by univariate Cox regression. The length of the horizontal line represents the 95% confidence interval for each group. The vertical dotted line represents the hazard ratio (HR) of all patients. Analyses of individual dataset (E–G) TCGA-LIHC, (H–J) GSE14520; (E,H) The correlation network of the pyroptosis-related genes (red line: positive correlation; blue line: negative correlation. The size ( $p$  value from 0.001 to 1) of the dot reflects the strength of the relationship between each gene and prognosis). The colors of dots represent protective (blue) and risk roles (red); Identification of potential immune subtypes of HCC based on pyroptosis genes. (F,I) PCA plots of clusters a (blue), b (yellow) and c (red); (G,J) Overall survival analysis of pyroptosis clusters a (blue), b (yellow) and c (red).

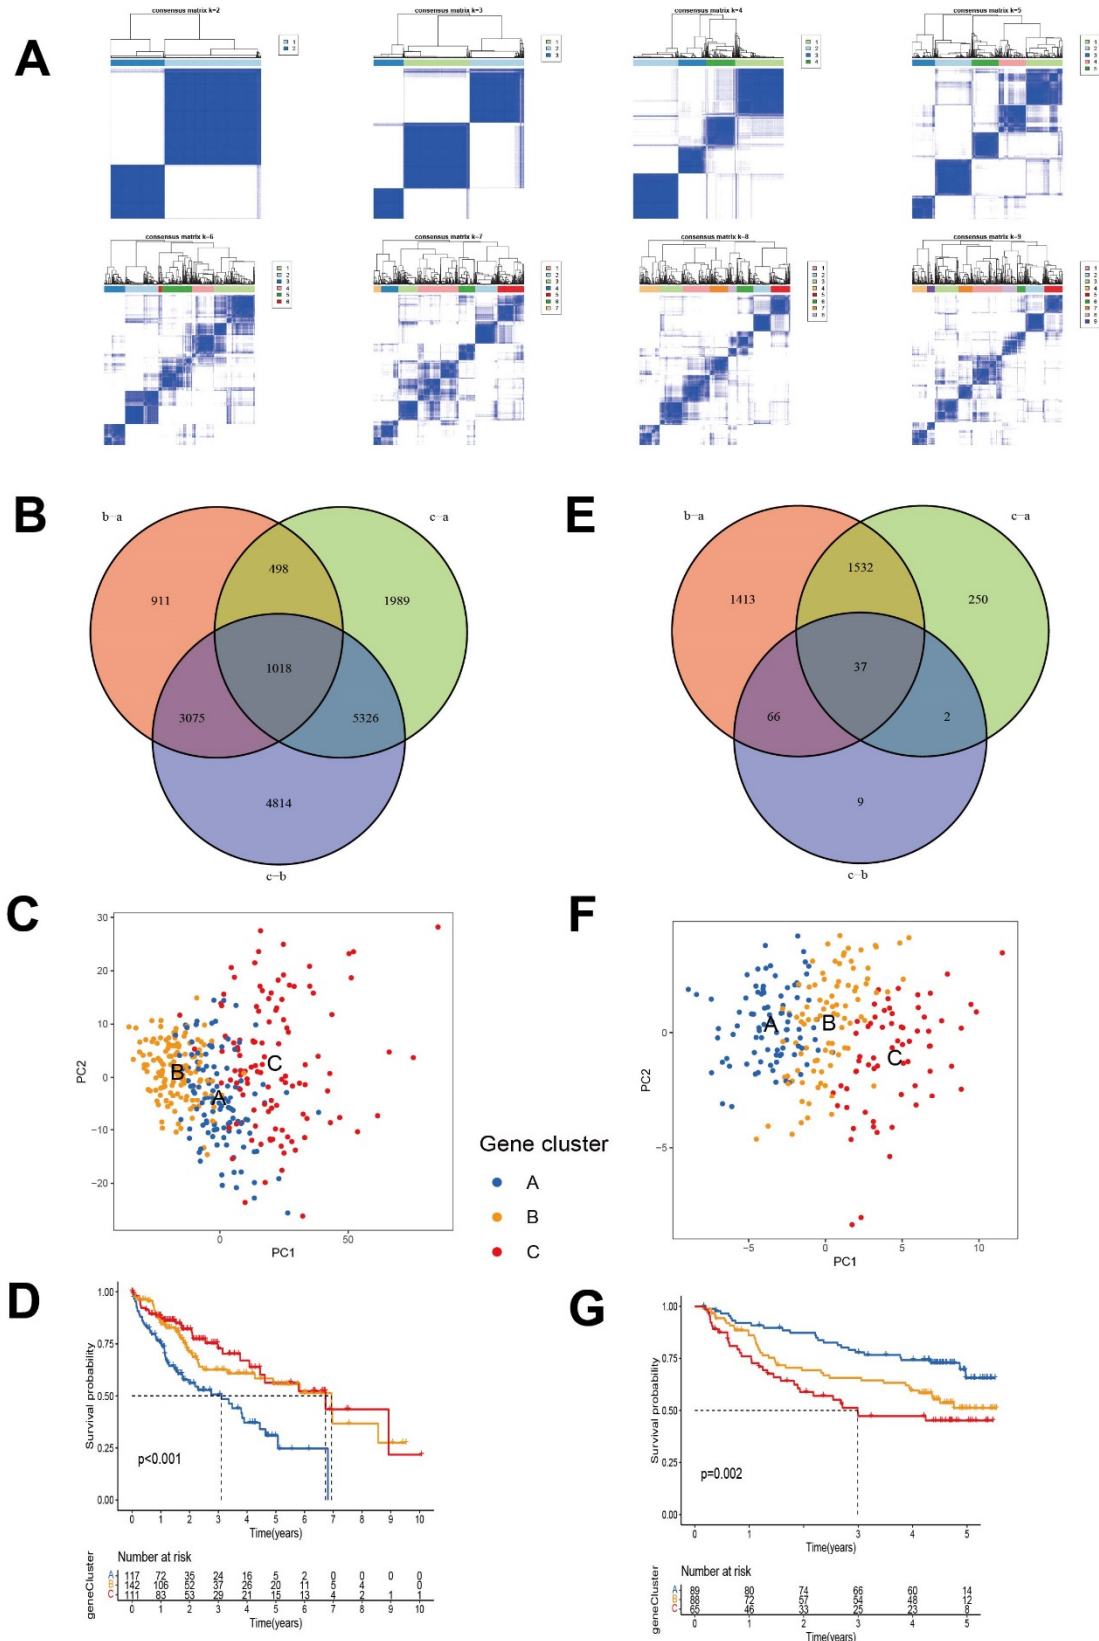

**Figure S3.** Identification of DEG-related subtypes. **(A)** The consensus distributions for k (2 to 9) based on screened DEGs. Separated analyses of **(B–D)** TCGA-LIHC and **(E–G)** GSE14520; **(B)(E)** Overlapping analyses of significant genes using a Venn diagram. **(C),(F)** PCA plots of gene clusters A (blue), B (yellow) and C (red); **(D),(G)** Overall survival analysis of gene clusters A (blue), B (yellow) and C (red).



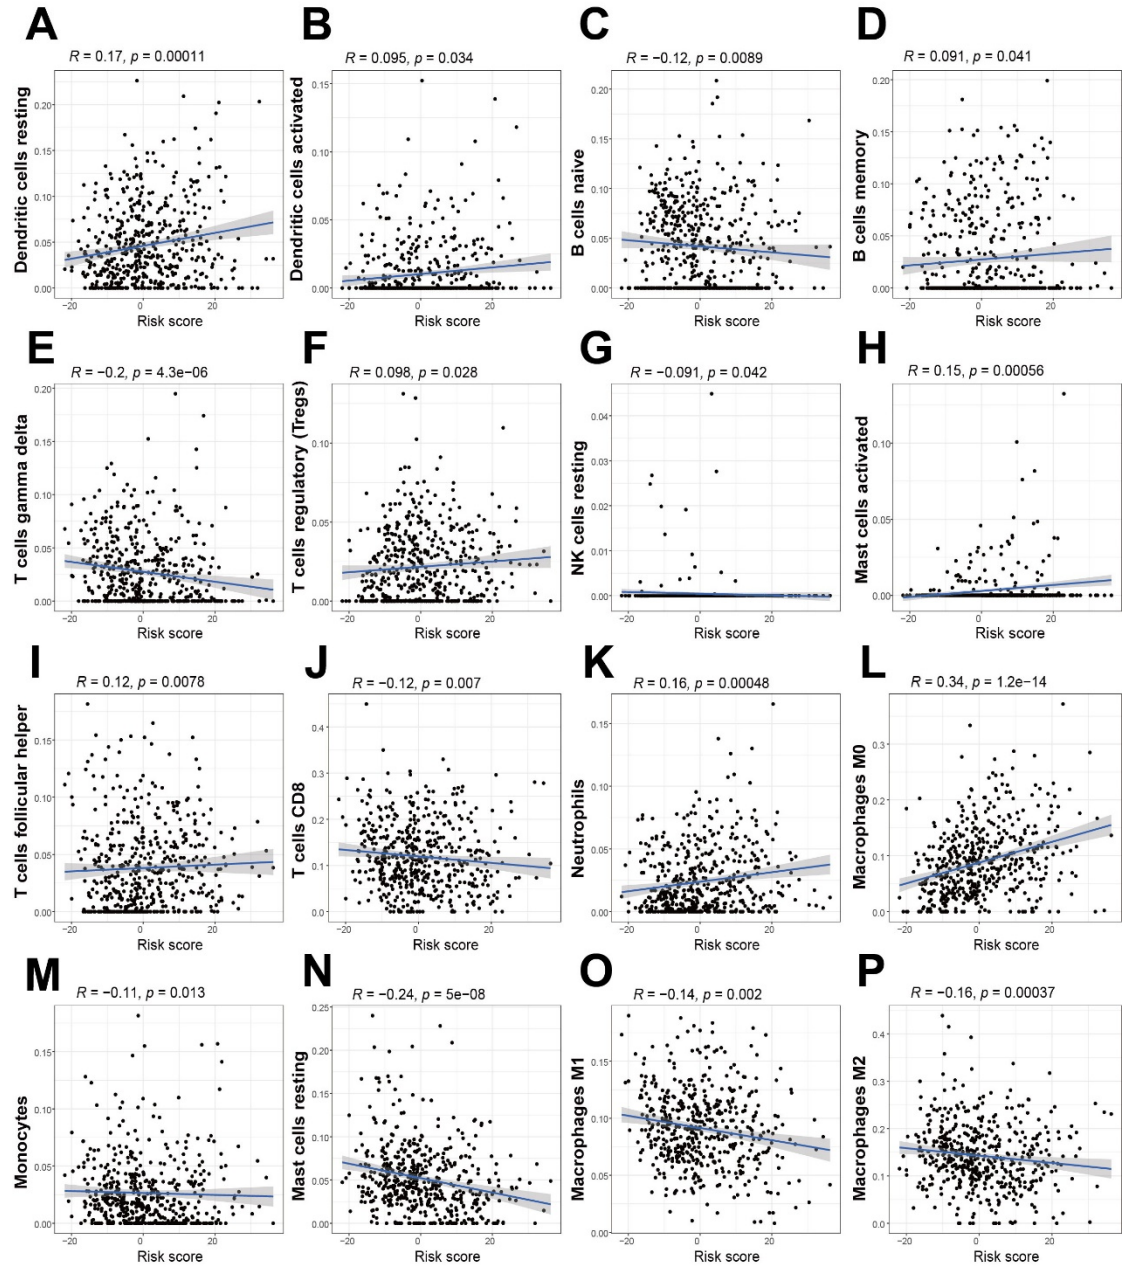

**Figure S5.** The association between pyroptosis risk scores and different immune subtypes (A) resting dendritic cell, (B) activated dendritic cell, (C) naïve B cell, (D) memory B cell, (E) gamma delta T cell, (F) Treg, (G) resting NK cell, (H) activated mast cell, (I) follicular helper T cell, (J) CD8+ T cell, (K) neutrophil, (L) M0 macrophage, (M) monocyte, (N) resting mast cell, (O) M1 macrophage, (P) M2 macrophage.

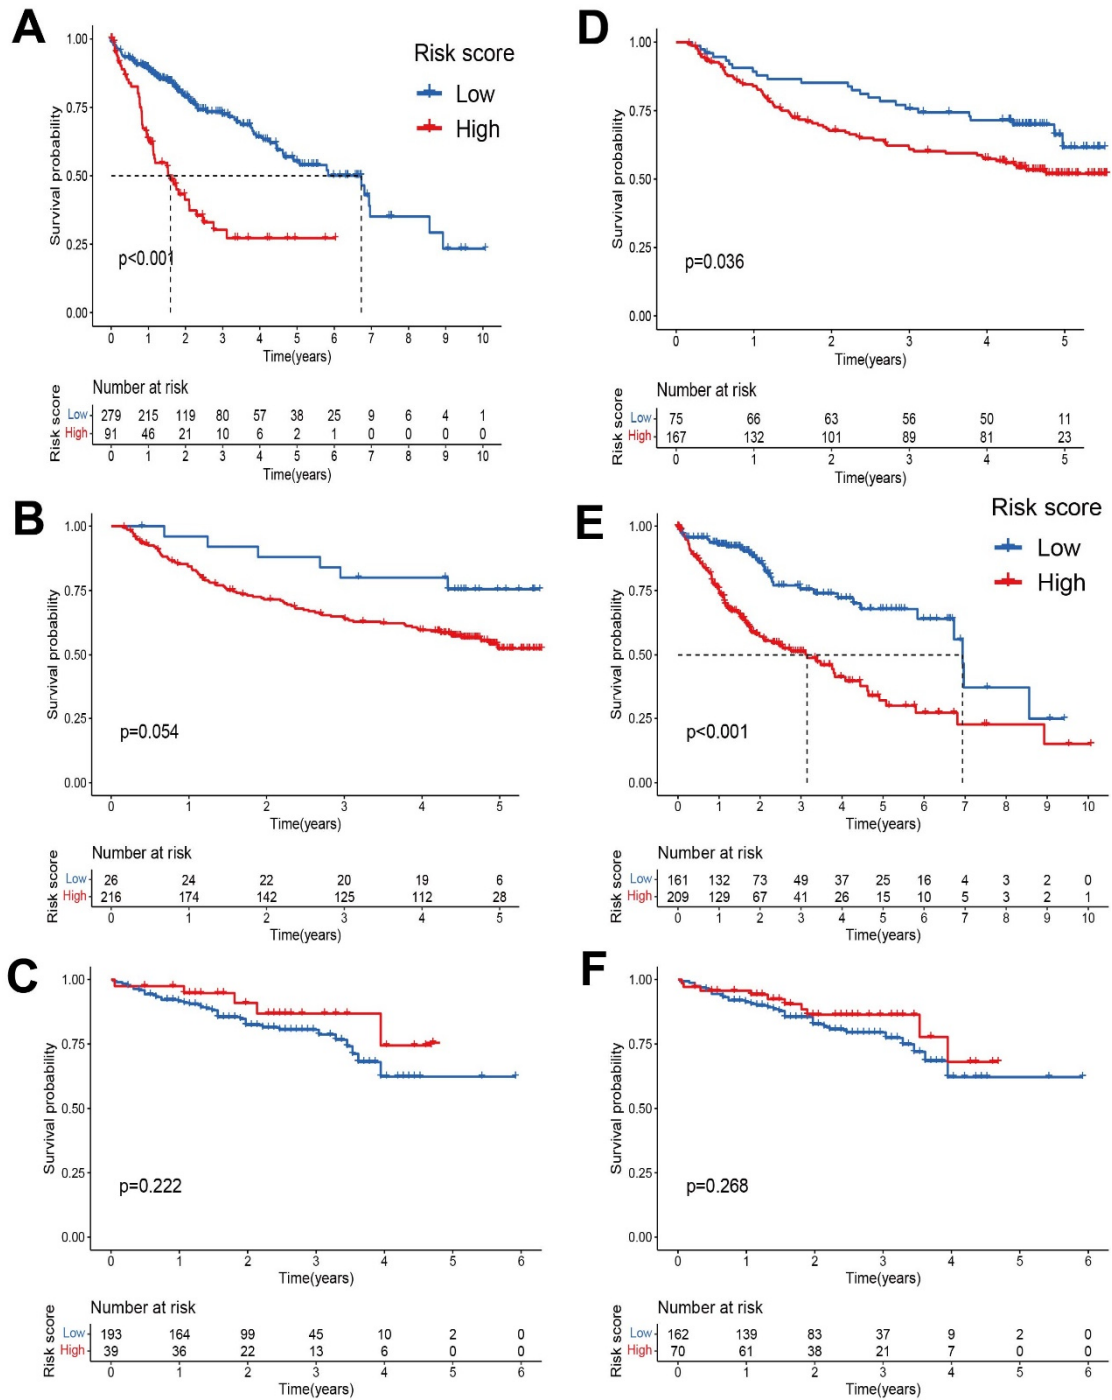

**Figure S6.** Cross verification of high (red)- and low (blue)- pyroptosis risk scoring system in overall survival analyses among separated databases. **(A)** Independent risk scoring classification within TCGA-LIHC, **(D)** independent risk scoring classification within GSE14520; **(B)** the efficiency of risk scoring system generated from TCGA-LIHC in classifying GSE14520 patients; **(E)** the efficiency of risk scoring system generated from GSE14520 in classifying TCGA-LIHC patients; And the further verification of the risk classification generated from TCGA-LIHC **(C)** and GSE14520 **(F)** in external ICGC data sets.

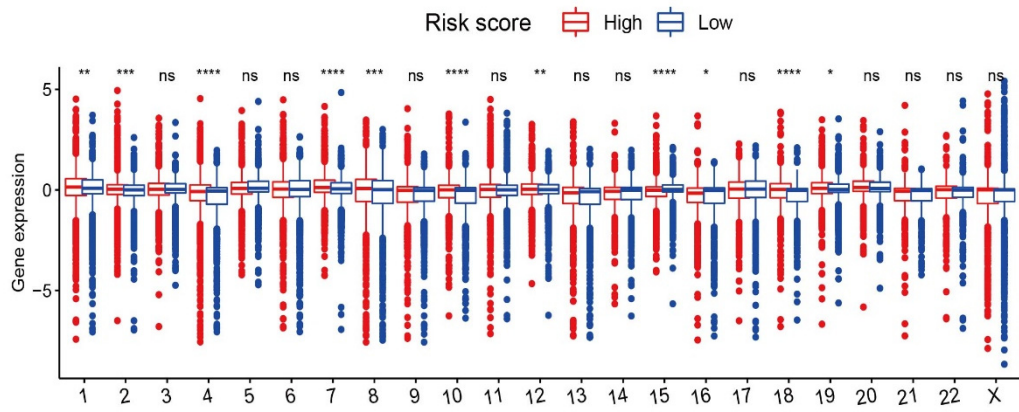

**Figure S7.** Statistical analysis of CNVs in whole chromosomes. \*  $p < 0.05$ , \*\*  $p < 0.01$ , \*\*\*  $p < 0.001$ .
