# Supplementary material for: Novel Risk Classification Based on Pyroptosis-Related Genes Defines Immune Microenvironment and Pharmaceutical Landscape for Hepatocellular Carcinoma
Source: Cancers (Basel). 2022 Jan 17;14(2):447. doi: 10.3390/cancers14020447 (PMC8773536; doi:10.3390/cancers14020447)
Supplement: Supplementary file 1 [file cancers-14-00447-s001.zip › Supplemental Tables.xlsx]

## Sheet: Table S1
Table S1: Basic information of pyroptosis genes in two hepatocellular carcinoma datasets
Gene	TCGA_CNVs	TCGA_Mutation & expression	GSE14520_expression	Reference
AIM2	√	√	√	1,2,4
CASP1	√	√	√	1,2,3,4
CASP3	√	√	√	4
CASP4	√	√	√	1,4
CASP5	√	√	√	1,4
CASP6	√	√	√
CASP8	√	√	√	3,4
CASP9	√	√	√	4
ELANE	√	√	√	9
GPX4	√	√	√	6
GSDMA	√	√	Not found	4
GSDMB	√	√	√	4
GSDMC	√	√	Not found	4
GSDMD	√	√	√	1,4,6
GSDME	Not found	√	√	4
IL18	√	√	√	3
IL1B	√	√	√	1,3
IL6	√	√	√	1
NLRC4	√	√	Not found	1,3,4
NLRP1	√	√	√	1
NLRP2	√	√	√	3
NLRP3	√	√	√	1,4
NLRP6	√	√	Not found	1
NLRP7	√	√	Not found	1,3
NOD1	√	√	√	3
NOD2	√	√	√	3
PJVK	Not found	√	Not found	4
PLCG1	√	√	√	6
PRKACA	√	√	√	8
PYCARD	√	√	√	7
SCAF11	√	√	√	3,8
TIRAP	√	√	Not found	5
TNF	√	√	√	3
1. Rajendra K, Thirumala-Devi K. Diverging inflammasome signals in tumorigenesis and potential targeting. Nat Rev Cancer. 2019.19(4):197–214. doi:10.1038/s41568-019-0123-y
2. Bing W, Qian Y. AIM2 inflammasome activation and regulation: A structural perspective. J Struct Biol. 2017;200(3): 279–282. doi:10.1016/j.jsb.2017.08.001
3. Si Ming M, Thirumala-Devi K. Regulation of inflammasome activation. Immunol Rev. 2015;265(1): 6–21. doi: 10.1111/imr.12296
4. Xiaojing X, Xin W, Zhe C, Wanhai Q, Liancheng L, Jinqing J, Jianhe H. The role of pyroptosis in cancer: pro-cancer or pro-“host”? Cell Death Dis. 2019;10(9): 650. doi: 10.1038/s41419-019-1883-8
5. Suemi Y, Yoshihiro S. TLR4-mediated pyroptosis in human hepatoma-derived HuH-7 cells induced by a branched-chain polyunsaturated fatty acid, geranylgeranoic acid.Biosci Rep.2020;40(4):BSR20194118. doi: 10.1042/BSR20194118
6. Rui K, Ling Z, Shan Z, Yangchun X, Jiao L, Qirong W, et al. Lipid Peroxidation Drives Gasdermin D-Mediated Pyroptosis in Lethal Polymicrobial Sepsis. Cell Host Microbe. 2018;24(1):97-108.e4. doi: 10.1016/j.chom.2018.05.009
7. Andreas L, Stefan B, Yiming C, Manuel A, Christophe J, Oliver T K, et al. CARD8 inflammasome activation triggers pyroptosis in human T cells. EMBO J. 2020;39(19):e105071. doi: 10.15252/embj.2020105071
8. Ruochan C, Ling Z, Shan Z, Jiao L, Herbert J Z, Guido K, et al. cAMP metabolism controls caspase-11 inflammasome activation and pyroptosis in sepsis. Sci Adv. 2019;5(5):eaav5562. doi: 10.1126/sciadv.aav5562
9. Yuan-Yuan Y, Ke-Xin X, Sha-Long W, Lian-Wen Y. Inflammatory caspase-related pyroptosis: mechanism, regulation and therapeutic potential for inflammatory bowel disease. Gastroenterol Rep (Oxf). 2018; 6(3): 167–176. doi: 10.1093/gastro/goy011 Add to Citavi project by DOI

## Sheet: Table S2
Table S2: Differentially expressed genes among three pyroptosis-clusters
b-a difference	logFC	P.Value	adj.P.Val	c-a difference	logFC	P.Value	adj.P.Val	c-b difference	logFC	P.Value	adj.P.Val
ABAT	0.2815	0.00316	0.03364	ABAT	-0.252	0.00513	0.01624	ABAT	-0.533	4.5e-07	3e-06
ABCC1	-0.298	0.00012	0.00363	ABCC1	0.4465	1.3e-09	1.8e-08	ABCC1	0.7443	1.27e-17	3.5e-16
ABT1	0.1161	0.00242	0.02839	ABT1	-0.107	0.00297	0.01025	ABT1	-0.223	1.42e-07	1.1e-06
ACADSB	0.2449	0.00144	0.02025	ACADSB	-0.278	0.00013	0.0007	ACADSB	-0.522	9.85e-10	1.1e-08
ACBD4	0.1636	0.00453	0.04209	ACBD4	-0.185	0.00068	0.00293	ACBD4	-0.348	5.1e-08	4.2e-07
ACOT9	-0.125	0.003	0.03265	ACOT9	0.1248	0.00163	0.0062	ACOT9	0.2494	8.53e-08	6.7e-07
ACTB	-0.079	0.00247	0.02882	ACTB	0.1423	9.7e-09	1.2e-07	ACTB	0.2211	3.87e-14	7.7e-13
ACTR3B	0.1433	0.00144	0.02027	ACTR3B	-0.143	0.00076	0.00322	ACTR3B	-0.286	1e-08	9.5e-08
ADA	-0.147	0.0014	0.01991	ADA	0.2284	1.8e-07	1.8e-06	ADA	0.3757	3.3e-13	6e-12
ADAM23	-0.346	0.005	0.04514	ADAM23	0.3828	0.00099	0.00406	ADAM23	0.7284	9.64e-08	7.5e-07
ADAM28	-0.25	0.00196	0.02501	ADAM28	0.8712	9.7e-28	7.3e-26	ADAM28	1.1216	8.34e-33	8.4e-31
ADI1	0.1748	0.00337	0.03485	ADI1	-0.166	0.00323	0.01101	ADI1	-0.34	2.59e-07	1.8e-06
ADIPOR1	0.1124	0.00129	0.01901	ADIPOR1	-0.153	3.8e-06	3e-05	ADIPOR1	-0.265	1.03e-11	1.5e-10
AIF1	-0.191	0.00014	0.00408	AIF1	0.6632	1.8e-39	6.6e-37	AIF1	0.8543	1.77e-46	1.2e-43
AIM2	-0.271	0.00474	0.04355	AIM2	1.3035	6.8e-41	4e-38	AIM2	1.575	2.44e-43	9.2e-41
ALAD	0.2299	1.5e-05	0.00089	ALAD	-0.265	1.4e-07	1.5e-06	ALAD	-0.495	1.15e-16	2.9e-15
ALDH2	0.1848	0.00165	0.02233	ALDH2	-0.197	0.00038	0.00177	ALDH2	-0.382	4.89e-09	4.9e-08
ALDH3A2	0.1696	0.0027	0.03035	ALDH3A2	-0.248	3.7e-06	2.9e-05	ALDH3A2	-0.418	3.63e-11	5e-10
ALDH5A1	0.2258	1.9e-05	0.00105	ALDH5A1	-0.246	8.2e-07	7.4e-06	ALDH5A1	-0.472	1.58e-15	3.6e-14
AMIGO2	-0.435	6.3e-05	0.00243	AMIGO2	0.5907	1.1e-08	1.4e-07	AMIGO2	1.0261	5.2e-17	1.4e-15
AMPD3	-0.18	0.00343	0.03529	AMPD3	0.5123	8.8e-18	2.7e-16	AMPD3	0.6925	6.54e-23	2.8e-21
ANGEL2	0.1475	5.8e-05	0.00229	ANGEL2	-0.155	7.3e-06	5.4e-05	ANGEL2	-0.303	1.5e-13	2.8e-12
ANKRD46	0.1908	0.00308	0.0332	ANKRD46	-0.163	0.00742	0.02203	ANKRD46	-0.354	7.37e-07	4.7e-06
ANXA2	-0.219	0.00022	0.00571	ANXA2	0.263	2.9e-06	2.3e-05	ANXA2	0.4825	3.77e-13	6.8e-12
ANXA2P2	-0.301	6.2e-05	0.00241	ANXA2P2	0.3063	1.6e-05	0.00011	ANXA2P2	0.6074	4.54e-13	8.1e-12
ANXA5	-0.352	1.2e-07	3.6e-05	ANXA5	0.3693	4.1e-09	5.5e-08	ANXA5	0.7211	7.39e-22	2.9e-20
AOAH	-0.18	0.00267	0.03014	AOAH	0.6952	2e-31	2.6e-29	AOAH	0.8754	9.58e-36	1.3e-33
APBB3	0.2783	1.4e-06	0.00018	APBB3	-0.154	0.00432	0.01406	APBB3	-0.433	1.41e-11	2e-10
APOBEC3C	-0.197	0.00031	0.00712	APOBEC3C	0.5368	8.8e-24	4.6e-22	APOBEC3C	0.7339	3.43e-31	2.8e-29
APOBEC3G	-0.285	3.8e-06	0.00037	APOBEC3G	0.6081	5.6e-24	3e-22	APOBEC3G	0.8934	1.57e-35	2.1e-33
AQP6	0.4518	0.00026	0.00631	AQP6	-0.391	0.00081	0.00341	AQP6	-0.842	9.06e-10	1e-08
AQP9	0.6211	8.4e-05	0.00288	AQP9	-0.441	0.00298	0.01027	AQP9	-1.062	1.35e-09	1.5e-08
ARF3	-0.119	0.002	0.02533	ARF3	0.1005	0.00573	0.01776	ARF3	0.2198	2.75e-07	1.9e-06
ARF4	-0.145	2.3e-05	0.00118	ARF4	0.09	0.00501	0.01592	ARF4	0.2345	5.98e-10	7e-09
ARHGAP4	-0.142	0.00265	0.03002	ARHGAP4	0.281	4.1e-10	6.2e-09	ARHGAP4	0.4225	1.54e-15	3.5e-14
ARHGDIB	-0.178	0.00033	0.00741	ARHGDIB	0.6234	2.6e-36	5.5e-34	ARHGDIB	0.8011	1.15e-42	3.9e-40
ARHGEF2	-0.248	1.8e-06	0.00022	ARHGEF2	0.1892	0.00011	0.00058	ARHGEF2	0.4369	4.57e-14	9e-13
ARHGEF3	-0.263	0.00089	0.01492	ARHGEF3	0.4227	1.9e-08	2.3e-07	ARHGEF3	0.6854	1.11e-14	2.4e-13
ARHGEF6	-0.178	0.00452	0.04209	ARHGEF6	0.5234	7e-18	2.2e-16	ARHGEF6	0.7015	1.06e-22	4.4e-21
ARID4B	0.1508	0.00209	0.02603	ARID4B	-0.118	0.01077	0.03002	ARID4B	-0.268	7.44e-07	4.8e-06
ARID5A	-0.13	0.00048	0.00975	ARID5A	0.1509	1.8e-05	0.00012	ARID5A	0.2807	1.34e-11	1.9e-10
ARL4C	-0.185	0.00217	0.02655	ARL4C	0.5151	1.2e-18	3.8e-17	ARL4C	0.6998	3.01e-24	1.4e-22
ARMC9	-0.18	0.00435	0.04126	ARMC9	0.1681	0.00477	0.0153	ARMC9	0.3482	6.46e-07	4.2e-06
ARMCX1	-0.3	0.00023	0.00589	ARMCX1	0.3529	4.9e-06	3.8e-05	ARMCX1	0.6531	8.05e-13	1.4e-11
ARMCX3	-0.4	0.00087	0.01467	ARMCX3	0.4959	1.3e-05	8.9e-05	ARMCX3	0.8957	2.26e-11	3.2e-10
ARMCX6	-0.465	3.7e-05	0.00168	ARMCX6	0.6096	1.3e-08	1.6e-07	ARMCX6	1.075	2.59e-17	7.1e-16
ARNT2	-0.532	0.0001	0.00334	ARNT2	0.3076	0.01673	0.04309	ARNT2	0.8395	3.03e-08	2.6e-07
ARNTL2	-0.355	0.00022	0.00572	ARNTL2	0.3421	0.00016	0.00083	ARNTL2	0.6969	7.49e-11	9.9e-10
ARPC2	-0.189	2.1e-09	1.8e-06	ARPC2	0.2433	6.8e-16	1.8e-14	ARPC2	0.4325	1e-32	9.9e-31
ARPC3	-0.156	2.2e-06	0.00025	ARPC3	0.118	0.00013	0.00071	ARPC3	0.2738	8.32e-14	1.6e-12
ASAH1	-0.199	1.6e-05	0.0009	ASAH1	0.2706	5.9e-10	8.7e-09	ASAH1	0.4692	1.55e-19	4.9e-18
ASMTL	0.1524	0.00162	0.022	ASMTL	-0.146	0.00135	0.00527	ASMTL	-0.299	2.6e-08	2.3e-07
ASNS	-0.301	0.004	0.03878	ASNS	0.2722	0.00581	0.01798	ASNS	0.5733	7.55e-07	4.8e-06
ATF6	0.1408	0.00039	0.00845	ATF6	-0.203	7.3e-08	7.9e-07	ATF6	-0.344	1.17e-14	2.5e-13
ATF7IP2	0.2089	0.00159	0.02183	ATF7IP2	-0.265	2.3e-05	0.00015	ATF7IP2	-0.474	1.32e-10	1.7e-09
ATP1B3	-0.479	1e-11	2.2e-08	ATP1B3	0.3603	4.6e-08	5.2e-07	ATP1B3	0.839	5.27e-26	2.8e-24
B3GALNT1	-0.321	6.4e-06	0.00051	B3GALNT1	0.1765	0.00824	0.02399	B3GALNT1	0.4978	2.93e-10	3.6e-09
B4GALT5	-0.159	0.00075	0.01333	B4GALT5	0.2477	3.2e-08	3.7e-07	B4GALT5	0.4065	1.48e-14	3.1e-13
BAIAP3	0.2542	2.4e-05	0.00119	BAIAP3	-0.169	0.00274	0.00957	BAIAP3	-0.423	2.26e-10	2.8e-09
BATF	-0.302	0.00016	0.00469	BATF	0.553	5.7e-13	1.2e-11	BATF	0.8548	5.16e-21	1.9e-19
BCAS3	0.137	0.0013	0.01901	BCAS3	-0.19	2.4e-06	2e-05	BCAS3	-0.327	5.99e-12	9.2e-11
BICD1	-0.308	1.2e-05	0.00074	BICD1	0.1873	0.00447	0.01449	BICD1	0.4948	2.09e-10	2.6e-09
BIN2	-0.164	0.00361	0.03627	BIN2	0.6679	1.6e-32	2.2e-30	BIN2	0.8322	2.36e-36	3.6e-34
BLVRA	-0.229	2.2e-05	0.00114	BLVRA	0.2513	8.2e-07	7.4e-06	BLVRA	0.4802	1.89e-15	4.2e-14
BNIP3L	-0.252	1.3e-06	0.00018	BNIP3L	0.2079	2.2e-05	0.00015	BNIP3L	0.46	2.86e-15	6.3e-14
BOLA1	0.1088	0.00449	0.04196	BOLA1	-0.189	2.2e-07	2.2e-06	BOLA1	-0.297	3.8e-12	6e-11
BPHL	0.24	4e-05	0.00174	BPHL	-0.276	5.9e-07	5.4e-06	BPHL	-0.516	3.18e-15	7e-14
C12orf49	-0.192	0.00041	0.00868	C12orf49	0.1419	0.0054	0.01692	C12orf49	0.3334	2.84e-08	2.5e-07
C1orf54	-0.136	0.00416	0.03992	C1orf54	0.4265	2.1e-20	7.9e-19	C1orf54	0.5622	3.59e-25	1.8e-23
C1QA	-0.246	0.00027	0.00644	C1QA	0.7783	3.5e-31	4.2e-29	C1QA	1.0245	3.2e-38	5.6e-36
C1QB	-0.282	3.4e-05	0.00156	C1QB	0.8631	9.1e-37	2.1e-34	C1QB	1.1452	1.59e-45	8.4e-43
C4BPB	0.2805	0.00172	0.02292	C4BPB	-0.201	0.01722	0.04412	C4BPB	-0.481	1.17e-06	7.2e-06
C5orf30	-0.583	4.2e-09	2.9e-06	C5orf30	0.244	0.00833	0.02416	C5orf30	0.8267	5.92e-14	1.2e-12
CA14	0.3791	0.00066	0.01229	CA14	-0.404	0.00012	0.00065	CA14	-0.783	2.66e-10	3.3e-09
CACNB1	-0.172	0.00372	0.03701	CACNB1	0.1438	0.01003	0.0283	CACNB1	0.3156	1.49e-06	8.9e-06
CAP1	-0.133	1.6e-05	0.00093	CAP1	0.2095	1.3e-12	2.5e-11	CAP1	0.3426	1.56e-22	6.4e-21
CAPG	-0.393	1.1e-06	0.00016	CAPG	0.5253	7.8e-12	1.4e-10	CAPG	0.9188	1.1e-23	4.9e-22
CAPZB	-0.103	0.00041	0.00864	CAPZB	0.1602	7.2e-09	9.3e-08	CAPZB	0.2631	8.75e-16	2e-14
CASP1	-0.279	1.6e-06	0.0002	CASP1	0.6007	3.6e-26	2.3e-24	CASP1	0.8794	1.86e-38	3.4e-36
CASP4	-0.157	0.00018	0.00493	CASP4	0.3094	1.3e-14	3.2e-13	CASP4	0.4662	1.16e-22	4.8e-21
CBFB	-0.104	0.00392	0.03827	CBFB	0.1481	1.4e-05	9.7e-05	CBFB	0.252	3.4e-10	4.1e-09
CBX8	0.155	1.2e-05	0.00076	CBX8	-0.098	0.00315	0.01076	CBX8	-0.253	1.22e-10	1.6e-09
CCL20	-0.846	4.9e-07	9.6e-05	CCL20	0.5571	0.00042	0.00192	CCL20	1.4035	7.12e-14	1.4e-12
CCL5	-0.239	0.00121	0.01826	CCL5	0.8819	3.9e-33	6e-31	CCL5	1.1207	2.88e-38	5.1e-36
CCR2	-0.285	0.00044	0.00913	CCR2	0.8473	2.4e-26	1.5e-24	CCR2	1.1327	3.12e-33	3.4e-31
CCR5	-0.218	0.00388	0.03804	CCR5	0.9497	5.4e-36	1.1e-33	CCR5	1.168	2.53e-39	4.9e-37
CCS	0.1583	0.0005	0.00989	CCS	-0.161	0.00018	0.0009	CCS	-0.319	2.78e-10	3.4e-09
CD2	-0.366	5.7e-06	0.00048	CD2	0.8849	6.8e-29	6.2e-27	CD2	1.2504	6.13e-40	1.3e-37
CD3D	-0.37	2.8e-05	0.00131	CD3D	0.8255	6.2e-22	2.7e-20	CD3D	1.1951	9.59e-32	8.4e-30
CD3E	-0.199	0.0047	0.04323	CD3E	0.7538	1.8e-27	1.3e-25	CD3E	0.9527	1.74e-31	1.5e-29
CD3G	-0.249	0.00271	0.03035	CD3G	0.9197	4e-29	3.7e-27	CD3G	1.1685	1.15e-33	1.3e-31
CD4	-0.114	0.00572	0.04919	CD4	0.3342	4.4e-17	1.3e-15	CD4	0.4478	1.12e-21	4.3e-20
CD47	-0.207	1.5e-05	0.00088	CD47	0.1706	0.00015	0.00077	CD47	0.3775	1.35e-12	2.3e-11
CD48	-0.222	0.00284	0.03137	CD48	0.882	1.2e-32	1.7e-30	CD48	1.104	8.97e-37	1.4e-34
CD52	-0.202	0.00221	0.02682	CD52	0.7179	3.4e-28	2.8e-26	CD52	0.92	4.47e-33	4.7e-31
CD53	-0.276	2.2e-05	0.00115	CD53	0.9339	3.6e-45	6.3e-42	CD53	1.2101	1.45e-53	3.8e-50
CD63	-0.105	0.00129	0.01901	CD63	0.096	0.00177	0.00664	CD63	0.2009	2.75e-08	2.4e-07
CD7	-0.27	0.00066	0.01223	CD7	0.4382	6.4e-09	8.3e-08	CD7	0.7084	1.89e-15	4.2e-14
CD74	-0.311	7.1e-07	0.00012	CD74	0.6154	5.8e-24	3.1e-22	CD74	0.926	5.94e-37	9.6e-35
CD86	-0.153	0.00385	0.03795	CD86	0.7112	2.9e-40	1.3e-37	CD86	0.8643	4.48e-43	1.6e-40
CD96	-0.215	0.00386	0.03797	CD96	0.7379	4.2e-24	2.3e-22	CD96	0.9527	1.14e-28	7.4e-27
CDC25B	-0.367	1.4e-10	1.8e-07	CDC25B	0.2011	0.00016	0.00082	CDC25B	0.5678	5.77e-19	1.8e-17
CDC5L	0.1866	2.7e-05	0.00128	CDC5L	-0.129	0.00208	0.00759	CDC5L	-0.315	1.69e-10	2.1e-09
CDC7	-0.295	0.00022	0.00571	CDC7	0.2057	0.00615	0.01888	CDC7	0.5005	1.53e-08	1.4e-07
CDK2AP1	-0.144	0.0017	0.02276	CDK2AP1	0.1397	0.00129	0.00506	CDK2AP1	0.2842	2.63e-08	2.3e-07
CEP55	-0.292	0.00113	0.01741	CEP55	0.2478	0.00342	0.01157	CEP55	0.5402	5.82e-08	4.7e-07
CES2	0.3632	0.00034	0.00773	CES2	-0.297	0.00185	0.00687	CES2	-0.661	4.46e-09	4.5e-08
CFL1	-0.087	0.00114	0.01746	CFL1	0.1492	4.5e-09	6.1e-08	CFL1	0.2362	3.69e-15	8.1e-14
CH25H	0.3631	0.00206	0.02581	CH25H	0.6571	4.8e-09	6.4e-08	CH25H	0.294	0.023096	0.04619
CHN1	-0.22	0.0023	0.02749	CHN1	0.2391	0.00045	0.00204	CHN1	0.4591	1.01e-08	9.6e-08
CHST11	-0.263	0.00035	0.00773	CHST11	0.4886	3.4e-12	6.2e-11	CHST11	0.7512	1.48e-19	4.7e-18
CKAP4	-0.187	0.00131	0.01905	CKAP4	0.1309	0.01675	0.04313	CKAP4	0.3176	7.86e-07	5e-06
CLDN14	0.2595	0.00129	0.01901	CLDN14	-0.404	1.4e-07	1.4e-06	CLDN14	-0.663	2.08e-13	3.9e-12
CLEC2D	-0.217	0.0003	0.00704	CLEC2D	0.3483	1.2e-09	1.7e-08	CLEC2D	0.5658	6.78e-17	1.7e-15
CLIC1	-0.237	4.8e-06	0.00043	CLIC1	0.1871	0.00012	0.00066	CLIC1	0.424	2.19e-13	4e-12
CLIC2	-0.183	0.00122	0.01837	CLIC2	0.4541	9.2e-17	2.6e-15	CLIC2	0.6371	5.1e-23	2.2e-21
CLMN	0.2045	0.00236	0.02791	CLMN	-0.276	1.5e-05	0.0001	CLMN	-0.48	1.47e-10	1.9e-09
CLSTN1	-0.283	2.1e-06	0.00025	CLSTN1	0.1768	0.00163	0.00619	CLSTN1	0.4603	4.42e-12	6.9e-11
CLTCL1	0.3325	6.1e-06	0.0005	CLTCL1	-0.248	0.00034	0.00161	CLTCL1	-0.58	1.39e-12	2.3e-11
CNTNAP1	-0.231	0.00225	0.02716	CNTNAP1	0.231	0.00118	0.00474	CNTNAP1	0.4618	3.58e-08	3.1e-07
COBLL1	0.1968	0.00126	0.01879	COBLL1	-0.268	3.7e-06	2.9e-05	COBLL1	-0.464	9.43e-12	1.4e-10
COL5A2	-0.433	4.1e-06	0.00038	COL5A2	0.3202	0.00028	0.00137	COL5A2	0.7527	6.13e-13	1.1e-11
COL9A2	-0.342	0.00073	0.01314	COL9A2	0.2294	0.01593	0.04148	COL9A2	0.5709	3.39e-07	2.3e-06
COMMD8	-0.235	9.2e-06	0.00062	COMMD8	0.1613	0.00119	0.00476	COMMD8	0.3963	1.72e-11	2.5e-10
COQ6	0.123	0.00152	0.02103	COQ6	-0.099	0.00662	0.02009	COQ6	-0.222	2.32e-07	1.7e-06
CORO1A	-0.306	1.8e-06	0.00022	CORO1A	0.8427	3.7e-39	1.2e-36	CORO1A	1.149	1.3e-50	1.7e-47
CORO1C	-0.23	2.2e-06	0.00026	CORO1C	0.2056	7e-06	5.2e-05	CORO1C	0.4354	1.15e-15	2.7e-14
COTL1	-0.217	8.1e-05	0.00285	COTL1	0.7698	2.3e-43	3e-40	COTL1	0.9864	1.48e-50	1.7e-47
CRADD	0.1372	0.00251	0.02911	CRADD	-0.101	0.01863	0.04709	CRADD	-0.238	2.2e-06	1.3e-05
CRHR2	0.1903	0.00379	0.03751	CRHR2	-0.18	0.00377	0.01256	CRHR2	-0.37	3.82e-07	2.6e-06
CRP	-0.784	6.9e-05	0.00257	CRP	0.5782	0.0018	0.00673	CRP	1.3624	4.71e-10	5.5e-09
CRY2	0.1932	2.6e-05	0.00126	CRY2	-0.204	2.6e-06	2.2e-05	CRY2	-0.397	1.14e-14	2.4e-13
CRYL1	0.2215	0.00236	0.0279	CRYL1	-0.267	0.00011	0.00059	CRYL1	-0.488	1.7e-09	1.9e-08
CRYZL1	0.135	0.00032	0.00735	CRYZL1	-0.092	0.00904	0.02587	CRYZL1	-0.227	4.67e-08	3.9e-07
CSF1R	-0.161	0.00278	0.03084	CSF1R	0.6452	2.8e-33	4.5e-31	CSF1R	0.8062	2.37e-37	3.9e-35
CSF3R	-0.24	0.00201	0.02538	CSF3R	0.5775	1.2e-14	2.9e-13	CSF3R	0.8177	2e-20	6.8e-19
CTSB	-0.141	0.0008	0.01407	CTSB	0.2205	3.2e-08	3.7e-07	CTSB	0.3612	1.71e-14	3.5e-13
CTSC	-0.441	7.5e-08	2.5e-05	CTSC	0.6276	1.2e-15	3.1e-14	CTSC	1.0684	6.08e-30	4.5e-28
CTSS	-0.245	0.00013	0.00386	CTSS	0.5474	8.4e-19	2.8e-17	CTSS	0.7922	3.13e-27	1.8e-25
CXCL1	-0.479	0.00446	0.0418	CXCL1	0.8421	1.5e-07	1.5e-06	CXCL1	1.3214	2.4e-12	3.9e-11
CXCL13	-0.509	0.0044	0.04152	CXCL13	1.034	1.4e-09	1.9e-08	CXCL13	1.5433	1.55e-14	3.2e-13
CXCL5	-0.539	0.00063	0.0118	CXCL5	0.8219	4.1e-08	4.7e-07	CXCL5	1.3612	1.43e-14	3e-13
CXCL6	-0.661	0.00121	0.01826	CXCL6	1.0352	9.6e-08	1e-06	CXCL6	1.6966	1.24e-13	2.3e-12
CXCR3	-0.228	0.00296	0.03237	CXCR3	0.7462	2.7e-23	1.4e-21	CXCR3	0.9741	3.05e-28	1.9e-26
CXCR6	-0.253	0.00123	0.01846	CXCR6	0.8017	1.6e-25	9.3e-24	CXCR6	1.0543	2.47e-31	2.1e-29
CYB5R1	0.1688	0.00041	0.00868	CYB5R1	-0.126	0.00492	0.01568	CYB5R1	-0.295	2.46e-08	2.2e-07
CYBB	-0.214	0.00042	0.0088	CYBB	0.7684	1.1e-36	2.4e-34	CYBB	0.9822	1e-42	3.5e-40
CYP27A1	0.2125	0.00471	0.04333	CYP27A1	-0.17	0.01647	0.04255	CYP27A1	-0.382	4.27e-06	2.3e-05
CYP3A4	0.5798	0.00268	0.03028	CYP3A4	-0.527	0.0038	0.01263	CYP3A4	-1.107	2.32e-07	1.7e-06
CYP4F2	0.404	0.00272	0.03043	CYP4F2	-0.366	0.00398	0.01311	CYP4F2	-0.77	2.53e-07	1.8e-06
CYTL1	-0.276	0.00515	0.04577	CYTL1	0.2685	0.00387	0.01282	CYTL1	0.5443	6.21e-07	4e-06
DAB2	-0.545	4e-12	1.4e-08	DAB2	0.5069	7.6e-12	1.3e-10	DAB2	1.0518	9.26e-32	8.3e-30
DBN1	-0.232	0.00062	0.01164	DBN1	0.1974	0.00203	0.00743	DBN1	0.4298	1.16e-08	1.1e-07
DBNDD2	-0.322	0.00039	0.00845	DBNDD2	0.2686	0.00165	0.00628	DBNDD2	0.5901	4.48e-09	4.5e-08
DCXR	0.3087	0.00026	0.00631	DCXR	-0.349	1.3e-05	9e-05	DCXR	-0.657	3.33e-12	5.4e-11
DECR2	0.1917	0.00058	0.01105	DECR2	-0.166	0.00154	0.0059	DECR2	-0.358	7.09e-09	6.9e-08
DENND2D	-0.336	3.2e-06	0.00033	DENND2D	0.4932	7.5e-13	1.5e-11	DENND2D	0.829	4.71e-24	2.1e-22
DEPDC5	0.1347	0.00125	0.01867	DEPDC5	-0.202	3.5e-07	3.4e-06	DEPDC5	-0.336	5.86e-13	1e-11
DEXI	0.1885	0.00035	0.00773	DEXI	-0.121	0.01476	0.03905	DEXI	-0.309	1.14e-07	8.7e-07
DGCR9	0.3005	0.00326	0.03416	DGCR9	-0.261	0.00676	0.02042	DGCR9	-0.561	6.99e-07	4.5e-06
DGKA	-0.236	2.1e-05	0.00112	DGKA	0.486	1.7e-19	5.8e-18	DGKA	0.7223	1.45e-29	1e-27
DGKZ	-0.11	0.00501	0.04523	DGKZ	0.1943	1.8e-07	1.8e-06	DGKZ	0.3042	3.72e-12	5.9e-11
DHRS4	0.1527	0.00469	0.04323	DHRS4	-0.177	0.00052	0.00232	DHRS4	-0.33	3.8e-08	3.2e-07
DHTKD1	0.1885	0.00258	0.02948	DHTKD1	-0.296	5.9e-07	5.5e-06	DHTKD1	-0.485	4.03e-12	6.4e-11
DHX16	0.0972	0.00139	0.01991	DHX16	-0.091	0.00159	0.00609	DHX16	-0.188	2.64e-08	2.3e-07
DOCK2	-0.217	0.00131	0.01905	DOCK2	0.9444	3.6e-43	4.2e-40	DOCK2	1.1612	4.62e-47	3.2e-44
DPYSL2	-0.203	0.00453	0.04209	DPYSL2	0.3178	2.9e-06	2.4e-05	DPYSL2	0.5213	7.12e-11	9.5e-10
DRD1	0.3148	0.00457	0.04243	DRD1	-0.244	0.01955	0.04902	DRD1	-0.559	5.29e-06	2.8e-05
DSG1	0.6224	2.7e-05	0.00128	DSG1	-0.338	0.01524	0.04011	DSG1	-0.96	5.02e-09	5e-08
DTWD1	0.1081	0.00557	0.0484	DTWD1	-0.092	0.01266	0.03444	DTWD1	-0.2	3.67e-06	2e-05
DYNLT1	-0.154	0.00016	0.00457	DYNLT1	0.166	1.6e-05	0.00011	DYNLT1	0.3199	1.99e-12	3.3e-11
DYRK2	-0.161	0.00146	0.02047	DYRK2	0.1281	0.0071	0.02125	DYRK2	0.2889	2.44e-07	1.7e-06
ECM2	0.4405	8.3e-06	0.00058	ECM2	-0.265	0.00428	0.01395	ECM2	-0.705	1.25e-10	1.6e-09
ECSIT	0.1221	0.00044	0.00919	ECSIT	-0.119	0.00028	0.00137	ECSIT	-0.241	4.44e-10	5.2e-09
EFHC2	-0.255	0.00318	0.03376	EFHC2	0.1972	0.01562	0.04089	EFHC2	0.4526	2.3e-06	1.3e-05
EHHADH	0.2705	0.0024	0.02826	EHHADH	-0.296	0.00044	0.00201	EHHADH	-0.566	1.06e-08	1e-07
ELF4	-0.307	1.2e-06	0.00017	ELF4	0.5483	2.7e-19	9.4e-18	ELF4	0.8552	9.55e-32	8.4e-30
ELOVL4	-0.302	0.00094	0.01545	ELOVL4	0.2335	0.0066	0.02004	ELOVL4	0.5355	1.18e-07	9e-07
EMP3	-0.22	9.7e-05	0.00326	EMP3	0.6273	2.1e-29	2e-27	EMP3	0.8473	1.12e-37	1.9e-35
EPB41L2	-0.326	1.9e-07	4.7e-05	EPB41L2	0.2338	7e-05	0.0004	EPB41L2	0.56	1.18e-15	2.7e-14
EPHX1	0.2688	0.00129	0.01901	EPHX1	-0.391	7.8e-07	7.1e-06	EPHX1	-0.66	1.56e-12	2.6e-11
EVI2A	-0.22	0.00066	0.01223	EVI2A	0.864	4.1e-40	1.7e-37	EVI2A	1.0839	3.15e-45	1.6e-42
EVI2B	-0.232	0.00076	0.01349	EVI2B	0.9218	4.6e-40	1.9e-37	EVI2B	1.1539	5.21e-45	2.5e-42
FAAH	0.1676	0.00366	0.03657	FAAH	-0.188	0.00056	0.0025	FAAH	-0.355	2.85e-08	2.5e-07
FAM8A1	0.2189	7.3e-06	0.00055	FAM8A1	-0.183	6.7e-05	0.00039	FAM8A1	-0.402	1.57e-13	2.9e-12
FARS2	0.1732	1.7e-05	0.00094	FARS2	-0.154	4.8e-05	0.00029	FARS2	-0.327	3.02e-13	5.5e-12
FBXO3	0.1559	0.00161	0.02192	FBXO3	-0.166	0.00038	0.00176	FBXO3	-0.322	4.61e-09	4.7e-08
FBXO41	-0.452	3.5e-08	1.6e-05	FBXO41	0.3193	3.3e-05	0.0002	FBXO41	0.7711	4e-17	1.1e-15
FCER1G	-0.315	7.6e-06	0.00055	FCER1G	0.801	1.1e-30	1.3e-28	FCER1G	1.1162	2.28e-41	6.1e-39
FCGR1A	-0.228	0.00387	0.03804	FCGR1A	1.0848	9.6e-42	9.2e-39	FCGR1A	1.3131	2.32e-44	1e-41
FCGR2A	-0.248	4.1e-05	0.00176	FCGR2A	0.7111	2.3e-32	3.2e-30	FCGR2A	0.9594	2.61e-41	6.9e-39
FCGR3A	-0.187	0.00085	0.01447	FCGR3A	0.4782	1.4e-18	4.5e-17	FCGR3A	0.6655	3.63e-25	1.8e-23
FIS1	0.1304	0.00093	0.01545	FIS1	-0.11	0.00316	0.01078	FIS1	-0.24	3.95e-08	3.3e-07
FUT4	-0.272	0.00302	0.03271	FUT4	0.3035	0.00046	0.00208	FUT4	0.5755	1.61e-08	1.5e-07
FUT8	-0.234	0.00099	0.01602	FUT8	0.6034	2.1e-18	6.6e-17	FUT8	0.8377	7.73e-25	3.7e-23
FZD7	-0.435	4.2e-06	0.00039	FZD7	0.4163	3e-06	2.4e-05	FZD7	0.8509	9.06e-16	2.1e-14
FZR1	0.0942	3.1e-05	0.00143	FZR1	-0.051	0.01618	0.042	FZR1	-0.145	6.67e-09	6.5e-08
G6PD	-0.349	7.3e-05	0.00268	G6PD	0.3127	0.00016	0.00082	G6PD	0.6613	1.42e-11	2.1e-10
GCA	-0.213	0.00146	0.02047	GCA	0.3199	4.9e-07	4.6e-06	GCA	0.5331	1.14e-12	2e-11
GCDH	0.1779	0.00532	0.04695	GCDH	-0.242	6.3e-05	0.00037	GCDH	-0.42	3.45e-09	3.6e-08
GFOD1	0.3005	3.7e-06	0.00037	GFOD1	-0.142	0.01969	0.0493	GFOD1	-0.442	7.79e-10	8.9e-09
GFOD2	0.1619	4e-06	0.00038	GFOD2	-0.078	0.01734	0.04438	GFOD2	-0.24	6.68e-10	7.7e-09
GJA1	0.2192	0.0032	0.03385	GJA1	0.422	2.6e-09	3.6e-08	GJA1	0.2029	0.013045	0.02829
GLUL	0.2779	0.00208	0.02598	GLUL	-0.233	0.00627	0.01918	GLUL	-0.51	3.32e-07	2.3e-06
GNAI2	-0.085	0.00453	0.04209	GNAI2	0.122	1.8e-05	0.00012	GNAI2	0.2072	5.85e-10	6.8e-09
GNG5	-0.156	8.7e-07	0.00014	GNG5	0.0912	0.00217	0.00788	GNG5	0.2473	2.38e-12	3.9e-11
GNMT	0.7327	1.1e-06	0.00016	GNMT	-0.328	0.01954	0.04902	GNMT	-1.061	1.78e-10	2.2e-09
GNPDA1	-0.201	0.00012	0.00363	GNPDA1	0.1776	0.0003	0.00146	GNPDA1	0.3786	6.92e-11	9.3e-10
GOT2	0.2182	4.8e-05	0.00197	GOT2	-0.129	0.01028	0.02886	GOT2	-0.348	5.09e-09	5.1e-08
GPHN	0.2488	2.3e-06	0.00026	GPHN	-0.147	0.00294	0.01016	GPHN	-0.396	1.33e-11	1.9e-10
GPNMB	-0.293	0.0005	0.00998	GPNMB	0.8737	4.2e-26	2.6e-24	GPNMB	1.1665	7.61e-33	7.8e-31
GRB2	-0.099	0.00511	0.04559	GRB2	0.086	0.00986	0.02788	GRB2	0.185	2.27e-06	1.3e-05
GRHPR	0.2419	7.1e-05	0.00261	GRHPR	-0.151	0.00828	0.02409	GRHPR	-0.393	5.74e-09	5.7e-08
GSPT2	-0.382	0.00563	0.04864	GSPT2	0.373	0.00414	0.01357	GSPT2	0.7549	7.78e-07	4.9e-06
GYG1	-0.198	0.0001	0.00334	GYG1	0.2686	2.6e-08	3.1e-07	GYG1	0.4664	3.38e-16	8.2e-15
GZMA	-0.194	0.00394	0.03837	GZMA	0.7118	5.7e-27	3.9e-25	GZMA	0.9054	2.97e-31	2.5e-29
H2AFZ	-0.154	0.00194	0.02485	H2AFZ	0.1404	0.00276	0.00962	H2AFZ	0.2945	9.22e-08	7.2e-07
HAGH	0.2651	0.00018	0.00493	HAGH	-0.239	0.00034	0.0016	HAGH	-0.504	1.47e-10	1.9e-09
HAVCR1	-0.514	0.00017	0.00476	HAVCR1	0.4095	0.00145	0.0056	HAVCR1	0.9234	1.14e-09	1.3e-08
HCK	-0.192	0.00047	0.00954	HCK	0.7418	8.8e-41	4.9e-38	HCK	0.9338	3.11e-46	1.9e-43
HCLS1	-0.229	9.2e-05	0.00313	HCLS1	0.816	4.8e-43	5e-40	HCLS1	1.0449	3.91e-50	4.1e-47
HDHD3	0.1416	0.0049	0.04452	HDHD3	-0.266	2.9e-08	3.3e-07	HDHD3	-0.408	4.95e-13	8.8e-12
HIBCH	0.1663	0.00065	0.01217	HIBCH	-0.129	0.00487	0.01559	HIBCH	-0.296	4.58e-08	3.8e-07
HIRIP3	0.182	0.00023	0.00589	HIRIP3	-0.122	0.00851	0.02464	HIRIP3	-0.304	2.78e-08	2.4e-07
HLA-A	-0.109	0.00363	0.03646	HLA-A	0.2529	1.6e-12	3.2e-11	HLA-A	0.3615	1.05e-17	2.9e-16
HLA-DMA	-0.291	0.00054	0.01041	HLA-DMA	0.7245	6.6e-19	2.2e-17	HLA-DMA	1.0158	6.16e-26	3.2e-24
HLA-DMB	-0.234	0.00036	0.00793	HLA-DMB	0.7948	4.2e-34	7.3e-32	HLA-DMB	1.0284	1.43e-40	3.3e-38
HLA-DPA1	-0.242	0.00196	0.02501	HLA-DPA1	0.8603	1e-28	9e-27	HLA-DPA1	1.1026	1.09e-33	1.2e-31
HLA-DPB1	-0.312	3.3e-06	0.00034	HLA-DPB1	0.7614	1.5e-30	1.7e-28	HLA-DPB1	1.0737	5.18e-42	1.6e-39
HLA-DQA1	-0.31	0.00013	0.00394	HLA-DQA1	0.8716	7.7e-28	6e-26	HLA-DQA1	1.1812	6.7e-36	9.7e-34
HLA-DQB1	-0.227	0.00076	0.01348	HLA-DQB1	0.6883	2.9e-25	1.7e-23	HLA-DQB1	0.9157	1.25e-31	1.1e-29
HLA-DRA	-0.326	4.4e-05	0.00186	HLA-DRA	0.7617	1.2e-22	5.8e-21	HLA-DRA	1.0879	5.23e-32	4.8e-30
HLA-DRB1	-0.257	9.6e-06	0.00064	HLA-DRB1	0.6561	2.8e-30	3.1e-28	HLA-DRB1	0.9133	9.24e-41	2.3e-38
HLCS	0.0914	0.00091	0.01511	HLCS	-0.1	0.00012	0.00066	HLCS	-0.191	4.4e-10	5.2e-09
HMGB2	-0.206	0.00238	0.02807	HMGB2	0.2	0.0018	0.00673	HMGB2	0.4064	6.93e-08	5.5e-07
HMOX1	-0.326	1.1e-05	0.00069	HMOX1	0.5712	8.7e-16	2.3e-14	HMOX1	0.8969	2.6e-26	1.4e-24
HPSE	-0.207	0.00331	0.03442	HPSE	0.6762	1.1e-22	5.2e-21	HPSE	0.8834	1.48e-27	8.7e-26
HSD17B8	0.3402	7.4e-08	2.5e-05	HSD17B8	-0.286	1.5e-06	1.3e-05	HSD17B8	-0.627	1.06e-18	3.2e-17
HSDL2	0.2072	0.00242	0.02839	HSDL2	-0.313	1.4e-06	1.2e-05	HSDL2	-0.52	9.51e-12	1.4e-10
HSPA1L	0.1533	0.00131	0.01905	HSPA1L	-0.122	0.00684	0.02063	HSPA1L	-0.275	1.99e-07	1.4e-06
HSPA6	-0.245	0.00183	0.02383	HSPA6	0.3453	3.6e-06	2.8e-05	HSPA6	0.5903	1.75e-11	2.5e-10
ICAM1	-0.233	0.0048	0.04395	ICAM1	0.6009	4.1e-14	9.2e-13	ICAM1	0.8339	5.16e-19	1.6e-17
IFI16	-0.219	0.00301	0.03269	IFI16	0.7737	1.7e-26	1.1e-24	IFI16	0.9925	3.61e-31	2.9e-29
IFI30	-0.307	6.5e-05	0.00247	IFI30	0.5156	2.3e-12	4.4e-11	IFI30	0.8229	3.89e-21	1.4e-19
IFNG	-0.338	0.00124	0.01864	IFNG	0.7114	1.3e-12	2.5e-11	IFNG	1.049	7.51e-19	2.3e-17
IFT57	-0.562	3.3e-12	1.4e-08	IFT57	0.2413	0.00129	0.00506	IFT57	0.8035	4.24e-19	1.3e-17
IGHG1	-0.298	0.0031	0.03327	IGHG1	0.8052	1.2e-16	3.4e-15	IGHG1	1.1028	6.36e-22	2.5e-20
IGHMBP2	0.1083	0.00502	0.04523	IGHMBP2	-0.118	0.0012	0.00479	IGHMBP2	-0.226	1.25e-07	9.5e-07
IGKC	-0.377	0.00205	0.02571	IGKC	1.0881	5.5e-20	2e-18	IGKC	1.465	1.43e-25	7.2e-24
IGSF6	-0.194	0.00172	0.02293	IGSF6	0.6721	4.6e-28	3.7e-26	IGSF6	0.8664	2.95e-33	3.2e-31
IL12A	-0.213	0.00508	0.04548	IL12A	0.3308	4.5e-06	3.5e-05	IL12A	0.5439	1.43e-10	1.8e-09
IL2RB	-0.195	0.00441	0.04156	IL2RB	0.7417	6.6e-28	5.2e-26	IL2RB	0.937	5.87e-32	5.3e-30
IL2RG	-0.301	8.3e-05	0.00288	IL2RG	0.8157	2.5e-27	1.8e-25	IL2RG	1.1171	7.04e-36	1e-33
IMPDH1	-0.28	4.8e-07	9.5e-05	IMPDH1	0.4145	6.3e-15	1.5e-13	IMPDH1	0.6942	8.7e-28	5.3e-26
INPP5D	-0.128	0.0055	0.04817	INPP5D	0.5045	2.1e-28	1.8e-26	INPP5D	0.6327	3.99e-32	3.7e-30
INSIG1	0.3325	0.00072	0.01297	INSIG1	-0.238	0.01023	0.02876	INSIG1	-0.57	1.64e-07	1.2e-06
IQGAP1	-0.19	0.00021	0.00556	IQGAP1	0.4804	7.7e-22	3.3e-20	IQGAP1	0.6708	1.02e-29	7.2e-28
IRF2BP1	0.1095	0.00046	0.0094	IRF2BP1	-0.083	0.00481	0.01542	IRF2BP1	-0.192	2.78e-08	2.4e-07
IRS1	0.2809	0.00019	0.00509	IRS1	-0.289	4.8e-05	0.00029	IRS1	-0.569	1.07e-11	1.6e-10
IRS2	0.2288	0.00237	0.02797	IRS2	-0.339	2e-06	1.7e-05	IRS2	-0.568	1.37e-11	2e-10
ITGA5	-0.176	0.00134	0.0194	ITGA5	0.1326	0.01028	0.02886	ITGA5	0.3087	3.8e-07	2.6e-06
ITGAM	-0.225	0.00127	0.0189	ITGAM	0.6057	4.4e-19	1.5e-17	ITGAM	0.8309	3.16e-25	1.6e-23
ITGB2	-0.226	0.00031	0.00723	ITGB2	0.9029	1.8e-45	3.9e-42	ITGB2	1.1285	7.37e-51	1.3e-47
ITM2C	-0.323	1e-07	3.2e-05	ITM2C	0.1403	0.01337	0.03605	ITM2C	0.4633	5.82e-12	9e-11
ITPR2	0.1607	0.00488	0.04436	ITPR2	-0.173	0.00131	0.00512	ITPR2	-0.334	1.34e-07	1e-06
KCNE2	0.2222	0.00555	0.04835	KCNE2	-0.32	2.5e-05	0.00016	KCNE2	-0.542	1.23e-09	1.4e-08
KCNJ8	0.351	0.0004	0.00862	KCNJ8	-0.288	0.00208	0.00758	KCNJ8	-0.639	6.6e-09	6.5e-08
KLF9	0.2443	0.0018	0.02358	KLF9	-0.216	0.00347	0.01171	KLF9	-0.46	1.15e-07	8.8e-07
KLHL20	0.1608	0.00011	0.00336	KLHL20	-0.111	0.00433	0.01409	KLHL20	-0.272	3.31e-09	3.4e-08
LAIR1	-0.211	0.00039	0.00843	LAIR1	0.6526	9e-29	7.9e-27	LAIR1	0.8634	1.3e-35	1.8e-33
LAMB1	-0.291	0.00094	0.01553	LAMB1	0.3688	9.4e-06	6.8e-05	LAMB1	0.6596	1.79e-11	2.6e-10
LAPTM5	-0.282	1.7e-07	4.5e-05	LAPTM5	0.7208	1.5e-40	7.3e-38	LAPTM5	1.0024	4.74e-54	1.7e-50
LARP4	0.1389	0.0005	0.00996	LARP4	-0.111	0.00304	0.01044	LARP4	-0.25	1.57e-08	1.4e-07
LCK	-0.208	0.00253	0.02916	LCK	0.7416	8.3e-28	6.4e-26	LCK	0.9492	1.46e-32	1.4e-30
LCP1	-0.358	1.2e-10	1.8e-07	LCP1	0.4679	1.5e-18	4.9e-17	LCP1	0.8258	1.25e-37	2.1e-35
LCP2	-0.209	7.7e-05	0.00276	LCP2	0.7975	3.5e-49	1.9e-45	LCP2	1.0061	9.06e-56	9.5e-52
LDHA	-0.138	0.00024	0.0059	LDHA	0.0928	0.0087	0.02506	LDHA	0.2311	2.94e-08	2.6e-07
LGALS3BP	-0.276	0.00551	0.04817	LGALS3BP	0.478	4e-07	3.8e-06	LGALS3BP	0.7536	1.09e-11	1.6e-10
LGALS9	-0.196	0.00085	0.01455	LGALS9	0.5385	5e-21	2e-19	LGALS9	0.7345	1.66e-27	9.6e-26
LHFPL2	-0.387	1.9e-07	4.7e-05	LHFPL2	0.438	4.6e-10	6.9e-09	LHFPL2	0.8246	9.21e-23	3.9e-21
LIG3	0.1017	0.00099	0.01603	LIG3	-0.072	0.01356	0.0365	LIG3	-0.174	3.91e-07	2.7e-06
LIMD2	-0.183	0.00265	0.03	LIMD2	0.3715	1.8e-10	2.8e-09	LIMD2	0.5547	6.32e-16	1.5e-14
LIMS1	-0.153	0.00016	0.00458	LIMS1	0.1009	0.00823	0.02398	LIMS1	0.2543	1.61e-08	1.5e-07
LONP2	0.1877	0.00399	0.03872	LONP2	-0.156	0.01137	0.03137	LONP2	-0.343	1.97e-06	1.1e-05
LRP12	-0.293	0.00069	0.01258	LRP12	0.2625	0.00125	0.00495	LRP12	0.5554	6.7e-09	6.6e-08
LRP5L	0.1734	0.00389	0.03814	LRP5L	-0.196	0.00057	0.0025	LRP5L	-0.369	3.16e-08	2.7e-07
LRP6	0.1427	0.00052	0.01024	LRP6	-0.178	5.1e-06	3.9e-05	LRP6	-0.32	3.18e-12	5.1e-11
LRRC2	0.3874	0.00028	0.00666	LRRC2	-0.236	0.01881	0.04746	LRRC2	-0.623	1.31e-07	9.8e-07
MAF	-0.163	0.00539	0.04753	MAF	0.1579	0.0042	0.01372	MAF	0.3206	7.43e-07	4.7e-06
MAP3K13	0.1381	0.00103	0.01647	MAP3K13	-0.132	0.00088	0.00365	MAP3K13	-0.27	7.41e-09	7.2e-08
MAPRE1	-0.154	0.00035	0.00788	MAPRE1	0.2002	9.7e-07	8.7e-06	MAPRE1	0.3544	2.16e-13	4e-12
MARCKS	-0.377	6e-10	6.3e-07	MARCKS	0.2698	2.3e-06	1.9e-05	MARCKS	0.6469	3.39e-21	1.2e-19
MARCKSL1	-0.312	2.4e-05	0.00119	MARCKSL1	0.2338	0.00076	0.00322	MARCKSL1	0.5457	3e-11	4.2e-10
MASP1	0.2196	0.00285	0.03143	MASP1	-0.266	0.00013	0.00069	MASP1	-0.486	2.92e-09	3.1e-08
MCTP2	-0.299	0.00499	0.04514	MCTP2	0.3864	0.00013	0.00068	MCTP2	0.6857	7.26e-09	7.1e-08
MFAP2	-0.417	0.00144	0.02025	MFAP2	0.5162	3e-05	0.00019	MFAP2	0.9333	1.54e-10	2e-09
MGST3	0.1292	0.00551	0.04817	MGST3	-0.179	5e-05	0.0003	MGST3	-0.308	2.76e-09	2.9e-08
MIA3	0.307	2.4e-08	1.2e-05	MIA3	-0.272	1.5e-07	1.5e-06	MIA3	-0.579	8.86e-21	3.1e-19
MICAL1	-0.296	9.3e-07	0.00014	MICAL1	0.5582	1.5e-21	6.5e-20	MICAL1	0.8546	2.79e-34	3.5e-32
MLF1	-0.284	0.0054	0.04754	MLF1	0.3576	0.00021	0.00105	MLF1	0.6417	1.55e-08	1.4e-07
MLH3	0.1159	0.00231	0.02751	MLH3	-0.094	0.00858	0.02481	MLH3	-0.21	6.09e-07	4e-06
MMACHC	0.1406	0.00353	0.03577	MMACHC	-0.226	7.5e-07	6.9e-06	MMACHC	-0.367	9.5e-12	1.4e-10
MMD	-0.286	0.00013	0.00394	MMD	0.2918	3.6e-05	0.00022	MMD	0.5779	4.37e-12	6.8e-11
MOSPD3	0.1338	0.00072	0.01296	MOSPD3	-0.172	4.2e-06	3.3e-05	MOSPD3	-0.306	4.19e-12	6.6e-11
MRPL2	0.1331	0.00018	0.00489	MRPL2	-0.093	0.0055	0.0172	MRPL2	-0.226	9.51e-09	9.1e-08
MRPL24	0.1011	0.00406	0.0391	MRPL24	-0.165	7.7e-07	7e-06	MRPL24	-0.266	1.28e-11	1.9e-10
MS4A4A	-0.218	0.00417	0.04001	MS4A4A	0.8184	1.2e-27	8.5e-26	MS4A4A	1.0363	8.22e-32	7.4e-30
MS4A6A	-0.23	0.00081	0.01417	MS4A6A	0.8362	4.1e-34	7.2e-32	MS4A6A	1.0665	1.26e-39	2.5e-37
MSN	-0.172	0.00578	0.04942	MSN	0.4058	1e-11	1.8e-10	MSN	0.5778	1.94e-16	4.8e-15
MTMR2	-0.257	4e-09	2.9e-06	MTMR2	0.1266	0.0019	0.00701	MTMR2	0.3835	2.96e-15	6.5e-14
MTR	0.2707	1.6e-05	0.00092	MTR	-0.21	0.00038	0.00177	MTR	-0.48	5.96e-12	9.2e-11
MTSS1	0.1194	0.00046	0.00941	MTSS1	-0.089	0.00555	0.01733	MTSS1	-0.208	3.48e-08	3e-07
MYO5A	-0.173	0.00176	0.02319	MYO5A	0.251	1.7e-06	1.5e-05	MYO5A	0.4241	6.8e-12	1e-10
NAP1L1	-0.279	2e-07	4.8e-05	NAP1L1	0.1537	0.00221	0.008	NAP1L1	0.4329	3.96e-13	7.1e-12
NCF2	-0.35	6.4e-06	0.00051	NCF2	0.6182	1.1e-16	3.1e-15	NCF2	0.9679	1.14e-27	6.9e-26
NCKAP1L	-0.19	0.00216	0.02652	NCKAP1L	0.8035	6.5e-38	1.8e-35	NCKAP1L	0.9938	8.7e-42	2.5e-39
NDRG2	0.2001	0.00256	0.02932	NDRG2	-0.28	8.4e-06	6.2e-05	NDRG2	-0.48	8.68e-11	1.1e-09
NDUFA5	0.1272	0.00032	0.00732	NDUFA5	-0.089	0.00761	0.02248	NDUFA5	-0.216	3.49e-08	3e-07
NDUFS7	0.1987	2.6e-05	0.00126	NDUFS7	-0.107	0.01603	0.04165	NDUFS7	-0.305	5.2e-09	5.2e-08
NECAP2	-0.095	0.00251	0.0291	NECAP2	0.2691	9e-19	3e-17	NECAP2	0.3639	3.38e-24	1.5e-22
NELL2	-0.337	0.00254	0.02926	NELL2	0.4929	3.1e-06	2.5e-05	NELL2	0.8294	2.65e-11	3.7e-10
NFE2L3	-0.207	0.00085	0.01447	NFE2L3	0.3586	1.3e-09	1.8e-08	NFE2L3	0.5656	5.22e-16	1.2e-14
NFIC	0.1936	0.00041	0.00875	NFIC	-0.171	0.00094	0.00391	NFIC	-0.364	2.17e-09	2.3e-08
NFYB	0.2677	1.5e-06	0.0002	NFYB	-0.169	0.00125	0.00493	NFYB	-0.436	1.81e-12	3e-11
NMI	-0.157	0.00258	0.02948	NMI	0.2613	1.2e-07	1.3e-06	NMI	0.4181	6.98e-13	1.2e-11
NNT	0.2384	0.00148	0.02059	NNT	-0.242	0.00064	0.00276	NNT	-0.48	8.17e-09	7.9e-08
NRP2	0.161	0.00271	0.03035	NRP2	0.3912	3.6e-14	8.2e-13	NRP2	0.2302	0.000102	0.0004
NUBPL	0.2318	2.4e-05	0.00119	NUBPL	-0.202	9.6e-05	0.00053	NUBPL	-0.434	1.38e-12	2.3e-11
OCEL1	0.1294	0.00332	0.03456	OCEL1	-0.168	5.6e-05	0.00033	OCEL1	-0.297	1.34e-09	1.5e-08
OGFRL1	-0.133	0.00484	0.0442	OGFRL1	0.328	4.5e-13	9.2e-12	OGFRL1	0.4609	5.61e-18	1.6e-16
OSBP	0.1024	0.00218	0.02668	OSBP	-0.1	0.00149	0.00575	OSBP	-0.203	4.71e-08	3.9e-07
OSBPL3	-0.438	3e-11	5.3e-08	OSBPL3	0.2008	0.00106	0.00429	OSBPL3	0.6387	3.42e-18	1e-16
OXCT1	-0.363	0.00069	0.01262	OXCT1	0.3433	0.00068	0.00292	OXCT1	0.7068	2.88e-09	3e-08
PADI2	0.2949	0.0052	0.04611	PADI2	0.631	3.8e-10	5.8e-09	PADI2	0.3361	0.003798	0.00973
PALLD	-0.278	0.00183	0.02382	PALLD	0.4026	2e-06	1.7e-05	PALLD	0.6811	8.83e-12	1.3e-10
PAM	-0.359	7.6e-05	0.00274	PAM	0.4907	1.2e-08	1.5e-07	PAM	0.8493	7.89e-17	2e-15
PARP8	-0.34	3.2e-07	6.9e-05	PARP8	0.3419	5.1e-08	5.7e-07	PARP8	0.6815	8.61e-20	2.8e-18
PCK2	0.2577	0.00096	0.01569	PCK2	-0.202	0.00609	0.01871	PCK2	-0.459	1.08e-07	8.3e-07
PCYOX1L	-0.309	2.9e-06	0.00031	PCYOX1L	0.2132	0.00058	0.00257	PCYOX1L	0.522	1.22e-12	2.1e-11
PEX11A	0.151	0.00261	0.02971	PEX11A	-0.199	2.8e-05	0.00018	PEX11A	-0.35	3.74e-10	4.5e-09
PEX12	0.1908	1.8e-05	0.00101	PEX12	-0.115	0.00599	0.01845	PEX12	-0.306	6.08e-10	7e-09
PEX19	0.1832	1.4e-05	0.00085	PEX19	-0.2	5.2e-07	4.9e-06	PEX19	-0.383	5.3e-16	1.3e-14
PEX5	0.0852	0.00356	0.03594	PEX5	-0.129	3.2e-06	2.6e-05	PEX5	-0.214	5.11e-11	7e-10
PFKFB1	0.4793	0.0002	0.00545	PFKFB1	-0.298	0.01419	0.03784	PFKFB1	-0.777	5.46e-08	4.5e-07
PFN2	-0.606	6.6e-07	0.00012	PFN2	0.4236	0.00021	0.00106	PFN2	1.0299	3.54e-14	7.1e-13
PGD	-0.208	0.0022	0.02681	PGD	0.1888	0.00313	0.0107	PGD	0.3964	1.33e-07	9.9e-07
PIGP	0.2441	1.7e-06	0.00021	PIGP	-0.163	0.00068	0.00292	PIGP	-0.407	7.62e-13	1.3e-11
PIK3CD	-0.227	1.4e-05	0.00085	PIK3CD	0.7381	3.6e-44	5.3e-41	PIK3CD	0.9648	3.73e-53	7.9e-50
PJA1	-0.264	3.5e-08	1.6e-05	PJA1	0.1098	0.01393	0.03728	PJA1	0.3734	1.89e-12	3.1e-11
PKIA	-0.54	1.7e-06	0.00021	PKIA	0.5067	1.8e-06	1.6e-05	PKIA	1.0462	1.16e-16	2.9e-15
PLA2G7	-0.321	0.00044	0.00913	PLA2G7	0.6167	1.7e-12	3.4e-11	PLA2G7	0.9378	1.19e-19	3.8e-18
PLAGL1	-0.448	2.3e-05	0.00118	PLAGL1	0.3572	0.00034	0.00161	PLAGL1	0.8055	8.47e-12	1.3e-10
PLEK	-0.233	0.00012	0.00363	PLEK	0.8119	1.5e-40	7.3e-38	PLEK	1.0445	1.26e-47	9.5e-45
PLEKHO1	-0.2	0.0001	0.00336	PLEKHO1	0.5303	1.2e-25	7.3e-24	PLEKHO1	0.7307	4.61e-34	5.5e-32
PLSCR1	-0.224	0.00015	0.00436	PLSCR1	0.4208	1.1e-13	2.5e-12	PLSCR1	0.6451	7.68e-22	3e-20
PLXNA1	-0.175	0.0014	0.01991	PLXNA1	0.236	5.5e-06	4.2e-05	PLXNA1	0.4112	1.81e-11	2.6e-10
PMAIP1	-0.275	0.00363	0.03646	PMAIP1	0.8107	1e-18	3.4e-17	PMAIP1	1.0858	9.74e-24	4.4e-22
PMVK	0.1364	0.00054	0.01042	PMVK	-0.212	1.7e-08	2e-07	PMVK	-0.348	3.88e-15	8.4e-14
POF1B	-0.47	0.00263	0.02981	POF1B	0.3848	0.00893	0.02562	POF1B	0.8546	7.71e-07	4.9e-06
POLR1C	0.1003	0.00556	0.04837	POLR1C	-0.096	0.00495	0.01574	POLR1C	-0.196	9.75e-07	6e-06
POMP	-0.091	0.00543	0.04769	POMP	0.0879	0.00448	0.01453	POMP	0.1791	8.22e-07	5.2e-06
PON3	0.3264	0.0014	0.01992	PON3	-0.25	0.00933	0.02657	PON3	-0.577	3.46e-07	2.4e-06
POR	0.1681	0.00485	0.04428	POR	-0.364	1.7e-10	2.7e-09	POR	-0.532	2.26e-15	5e-14
POU2AF1	-0.532	9.1e-06	0.00062	POU2AF1	1.1647	2.2e-23	1.1e-21	POU2AF1	1.697	3.45e-34	4.2e-32
PPM1A	0.145	2.5e-05	0.00124	PPM1A	-0.078	0.01517	0.03994	PPM1A	-0.223	4.62e-09	4.7e-08
PPP1R10	0.1274	0.00059	0.01118	PPP1R10	-0.116	0.00095	0.00391	PPP1R10	-0.243	3.64e-09	3.7e-08
PPP2R5A	0.0894	0.00295	0.03231	PPP2R5A	-0.109	0.00013	0.00069	PPP2R5A	-0.198	3.1e-09	3.2e-08
PPP2R5D	0.0845	0.00319	0.03376	PPP2R5D	-0.097	0.00035	0.00165	PPP2R5D	-0.181	1.24e-08	1.2e-07
PPT1	-0.233	2.8e-07	6.3e-05	PPT1	0.3129	4.5e-13	9.2e-12	PPT1	0.546	4.34e-26	2.3e-24
PRKCD	-0.212	5.1e-06	0.00044	PRKCD	0.1532	0.00045	0.00206	PRKCD	0.3651	1.7e-12	2.8e-11
PRNP	-0.295	3.6e-06	0.00036	PRNP	0.2302	0.00012	0.00065	PRNP	0.5251	1.43e-13	2.7e-12
PROX1	0.2326	0.0037	0.03691	PROX1	-0.349	4.5e-06	3.5e-05	PROX1	-0.581	8.04e-11	1.1e-09
PSAP	-0.119	0.00108	0.01687	PSAP	0.1464	2e-05	0.00014	PSAP	0.2652	5.87e-11	7.9e-10
PSD	0.2361	7e-06	0.00053	PSD	-0.129	0.00865	0.02495	PSD	-0.365	3.51e-10	4.2e-09
PSTPIP1	-0.226	0.00308	0.0332	PSTPIP1	0.7382	5.3e-23	2.6e-21	PSTPIP1	0.9644	6.24e-28	3.8e-26
PTGER4	-0.277	7.6e-05	0.00274	PTGER4	0.713	2.6e-25	1.5e-23	PTGER4	0.9901	4.58e-34	5.5e-32
PTMA	-0.119	0.00184	0.02384	PTMA	0.1102	0.00229	0.00827	PTMA	0.2297	6.59e-08	5.3e-07
PTP4A2	-0.103	0.00346	0.03543	PTP4A2	0.1696	3.7e-07	3.5e-06	PTP4A2	0.2722	4.08e-12	6.5e-11
PTPN2	-0.165	0.00129	0.01901	PTPN2	0.224	3.7e-06	2.9e-05	PTPN2	0.3886	9.92e-12	1.5e-10
PTPN7	-0.229	0.00086	0.01464	PTPN7	0.7765	4.5e-30	4.9e-28	PTPN7	1.0058	6.75e-36	9.7e-34
PTPRC	-0.31	0.00031	0.00712	PTPRC	1.0457	3.4e-34	6.2e-32	PTPRC	1.356	7.9e-41	2e-38
PTPRO	-0.272	0.0001	0.00334	PTPRO	0.5191	1.1e-14	2.7e-13	PTPRO	0.7911	3.18e-23	1.4e-21
PUS3	0.1302	0.00288	0.03174	PUS3	-0.115	0.00508	0.01612	PUS3	-0.246	3.9e-07	2.6e-06
PYCARD	-0.429	1e-07	3.2e-05	PYCARD	0.5227	8.5e-12	1.5e-10	PYCARD	0.9517	2.71e-25	1.3e-23
QPCT	-0.309	0.00082	0.01423	QPCT	0.35	6.1e-05	0.00036	QPCT	0.6591	1.52e-10	1.9e-09
RAB26	0.2852	0.00129	0.01901	RAB26	-0.198	0.01737	0.04442	RAB26	-0.484	8.17e-07	5.2e-06
RAB32	-0.331	8.2e-10	7.9e-07	RAB32	0.1788	0.00038	0.00176	RAB32	0.5094	2.27e-17	6.2e-16
RAB3A	0.1615	0.0016	0.02189	RAB3A	-0.121	0.01236	0.03377	RAB3A	-0.282	6.37e-07	4.1e-06
RAB3GAP2	0.1414	0.00313	0.03338	RAB3GAP2	-0.207	5.2e-06	4e-05	RAB3GAP2	-0.348	6.98e-11	9.3e-10
RAB40C	0.0768	0.00254	0.02926	RAB40C	-0.069	0.00427	0.01392	RAB40C	-0.145	2.53e-07	1.8e-06
RAB4A	0.1698	0.00064	0.01191	RAB4A	-0.252	8.9e-08	9.6e-07	RAB4A	-0.422	3.53e-14	7.1e-13
RAB8B	-0.165	2.7e-05	0.00128	RAB8B	0.2152	8.2e-09	1.1e-07	RAB8B	0.3805	8.7e-18	2.4e-16
RAC2	-0.205	0.00018	0.00489	RAC2	0.6772	2.7e-35	5.2e-33	RAC2	0.8824	1.88e-42	6.2e-40
RANBP10	0.181	0.00019	0.0052	RANBP10	-0.123	0.0072	0.02149	RANBP10	-0.304	1.65e-08	1.5e-07
RAP2B	-0.168	6.8e-08	2.5e-05	RAP2B	0.2479	1.1e-16	3.1e-15	RAP2B	0.4161	3.71e-31	3e-29
RARRES1	-0.311	0.00058	0.01103	RARRES1	0.6148	1.3e-12	2.5e-11	RARRES1	0.926	1.48e-19	4.7e-18
RARRES3	-0.21	0.00442	0.04165	RARRES3	0.4957	2.5e-12	4.7e-11	RARRES3	0.7057	2.51e-17	6.8e-16
RCN1	-0.335	3.8e-05	0.00169	RCN1	0.1881	0.01395	0.03733	RCN1	0.5236	6.63e-09	6.5e-08
REEP4	-0.11	0.00142	0.02009	REEP4	0.0812	0.01274	0.03466	REEP4	0.1917	5.71e-07	3.7e-06
RFX5	-0.126	0.00487	0.04436	RFX5	0.1015	0.016	0.04161	RFX5	0.2274	4.28e-06	2.3e-05
RGS10	-0.25	1.7e-07	4.5e-05	RGS10	0.3921	1.6e-17	4.7e-16	RGS10	0.6424	2.14e-31	1.8e-29
RGS19	-0.183	4.1e-05	0.00176	RGS19	0.2999	1.9e-12	3.6e-11	RGS19	0.4827	1.27e-21	4.9e-20
RHOG	-0.105	0.00236	0.0279	RHOG	0.1914	6.2e-09	8e-08	RHOG	0.2966	2.16e-14	4.4e-13
RHOQ	-0.246	1.5e-05	0.00088	RHOQ	0.2313	1.6e-05	0.00011	RHOQ	0.4778	5.8e-14	1.1e-12
RNASE4	0.2684	0.00111	0.01726	RNASE4	-0.25	0.00127	0.00501	RNASE4	-0.518	1.38e-08	1.3e-07
RNASE6	-0.159	0.00564	0.04872	RNASE6	0.7413	1.3e-37	3.5e-35	RNASE6	0.9004	3.14e-40	7e-38
RNF34	-0.183	4.3e-06	0.0004	RNF34	0.0887	0.01781	0.04532	RNF34	0.2721	7.62e-10	8.7e-09
ROR1	-0.354	0.00101	0.01618	ROR1	0.2442	0.0159	0.04142	ROR1	0.5979	5.16e-07	3.4e-06
RORA	0.305	5.5e-05	0.00218	RORA	-0.23	0.00121	0.00482	RORA	-0.535	1.89e-10	2.4e-09
RORC	0.228	0.00318	0.03376	RORC	-0.33	6.8e-06	5.1e-05	RORC	-0.558	9.91e-11	1.3e-09
RXRB	0.0782	0.00074	0.01317	RXRB	-0.096	1.3e-05	8.8e-05	RXRB	-0.174	1.7e-11	2.4e-10
S100A11	-0.356	5.6e-06	0.00047	S100A11	0.6135	4e-16	1.1e-14	S100A11	0.9699	3.43e-27	1.9e-25
S100A4	-0.284	9.2e-05	0.00313	S100A4	0.8287	9.7e-31	1.1e-28	S100A4	1.1126	5.85e-39	1.1e-36
S100A6	-0.342	0.00015	0.00436	S100A6	0.6475	6.9e-14	1.5e-12	S100A6	0.9893	4.49e-22	1.8e-20
SACS	-0.251	0.00209	0.02603	SACS	0.2486	0.00126	0.00497	SACS	0.5	3.48e-08	3e-07
SCN4A	0.2496	0.00343	0.03528	SCN4A	-0.24	0.00286	0.00993	SCN4A	-0.49	2.24e-07	1.6e-06
SCPEP1	-0.294	6.6e-05	0.0025	SCPEP1	0.3032	1.4e-05	9.4e-05	SCPEP1	0.5976	4.17e-13	7.4e-12
SCYL3	0.1153	0.00345	0.03538	SCYL3	-0.155	3.3e-05	0.0002	SCYL3	-0.27	7.4e-10	8.4e-09
SDC3	-0.292	5.2e-07	9.7e-05	SDC3	0.4708	3.8e-17	1.1e-15	SDC3	0.7628	3.81e-30	2.8e-28
SEC14L2	0.289	0.00375	0.03715	SEC14L2	-0.365	0.00011	0.00059	SEC14L2	-0.654	3.7e-09	3.8e-08
SEC31B	0.2386	0.00039	0.00845	SEC31B	-0.147	0.01973	0.04939	SEC31B	-0.386	2.15e-07	1.6e-06
SECISBP2	0.0862	0.00481	0.04396	SECISBP2	-0.096	0.00092	0.00381	SECISBP2	-0.182	8.25e-08	6.5e-07
SELENBP1	0.2554	0.00112	0.01731	SELENBP1	-0.312	2.6e-05	0.00016	SELENBP1	-0.567	8.2e-11	1.1e-09
SELPLG	-0.149	0.00095	0.01561	SELPLG	0.5903	1.2e-38	3.7e-36	SELPLG	0.7393	1.78e-43	6.9e-41
SEMA4D	-0.289	7.6e-06	0.00055	SEMA4D	0.7211	8.8e-30	9e-28	SEMA4D	1.0099	1.6e-40	3.6e-38
SERPINB9	-0.227	1.4e-05	0.00086	SERPINB9	0.433	1.1e-17	3.2e-16	SERPINB9	0.6603	4.71e-28	2.9e-26
SERPINH1	-0.2	0.00104	0.0165	SERPINH1	0.1825	0.00148	0.0057	SERPINH1	0.3822	1.55e-08	1.4e-07
SFXN3	-0.252	1.6e-05	0.00094	SFXN3	0.3215	6.7e-09	8.7e-08	SFXN3	0.5733	3.08e-18	9.1e-17
SH3BGRL	-0.298	3.1e-07	6.9e-05	SH3BGRL	0.4343	6.1e-15	1.5e-13	SH3BGRL	0.732	4.1e-28	2.6e-26
SH3BGRL3	-0.164	0.00039	0.00845	SH3BGRL3	0.3318	7.6e-14	1.7e-12	SH3BGRL3	0.4958	3.56e-21	1.3e-19
SH3GLB1	-0.13	0.0009	0.015	SH3GLB1	0.1485	5.7e-05	0.00034	SH3GLB1	0.2782	1.6e-10	2e-09
SIAH2	0.2063	0.00016	0.00461	SIAH2	-0.229	9.5e-06	6.9e-05	SIAH2	-0.435	1.04e-12	1.8e-11
SIRT3	0.0965	0.00406	0.0391	SIRT3	-0.175	4.2e-08	4.7e-07	SIRT3	-0.272	5.06e-13	8.9e-12
SIRT5	0.1301	0.00095	0.01557	SIRT5	-0.219	5e-09	6.6e-08	SIRT5	-0.349	2.89e-15	6.4e-14
SLA	-0.193	0.00373	0.03701	SLA	0.8567	1.7e-37	4.3e-35	SLA	1.0498	1.06e-40	2.5e-38
SLAMF8	-0.257	4.5e-05	0.00191	SLAMF8	0.8581	1.8e-41	1.4e-38	SLAMF8	1.115	1.68e-49	1.6e-46
SLC12A2	-0.307	0.00105	0.01659	SLC12A2	0.2509	0.00442	0.01437	SLC12A2	0.5576	7.6e-08	6e-07
SLC19A1	0.1235	0.00279	0.03093	SLC19A1	-0.143	0.00024	0.00119	SLC19A1	-0.267	6.23e-09	6.2e-08
SLC19A2	0.2429	9.8e-05	0.00329	SLC19A2	-0.251	2.1e-05	0.00014	SLC19A2	-0.493	1.34e-12	2.3e-11
SLC1A3	-0.38	3.4e-06	0.00035	SLC1A3	0.2939	0.00013	0.00071	SLC1A3	0.6739	1.56e-13	2.9e-12
SLC23A2	0.2534	0.00016	0.00457	SLC23A2	-0.164	0.00918	0.0262	SLC23A2	-0.418	1.92e-08	1.7e-07
SLC25A10	0.1242	0.0045	0.042	SLC25A10	-0.23	3.3e-08	3.8e-07	SLC25A10	-0.354	4.8e-13	8.5e-12
SLC25A24	-0.454	6.3e-06	0.00051	SLC25A24	0.6892	7.4e-13	1.5e-11	SLC25A24	1.1437	1.56e-23	6.8e-22
SLC27A5	0.4153	0.00082	0.01418	SLC27A5	-0.379	0.00119	0.00476	SLC27A5	-0.794	8.09e-09	7.8e-08
SLC30A1	0.2066	0.00076	0.01349	SLC30A1	-0.16	0.00557	0.01737	SLC30A1	-0.367	6.89e-08	5.5e-07
SLC30A10	0.3036	0.00216	0.02652	SLC30A10	-0.369	8.1e-05	0.00046	SLC30A10	-0.673	1.02e-09	1.1e-08
SLC36A1	-0.165	0.00105	0.0167	SLC36A1	0.1545	0.00117	0.00469	SLC36A1	0.3199	1.14e-08	1.1e-07
SLC38A1	-0.769	5.9e-10	6.3e-07	SLC38A1	0.3068	0.00791	0.02322	SLC38A1	1.0754	5.94e-15	1.3e-13
SLC4A7	-0.188	0.00301	0.03269	SLC4A7	0.2908	1.3e-06	1.1e-05	SLC4A7	0.4786	1.29e-11	1.9e-10
SLCO3A1	-0.197	0.00333	0.03456	SLCO3A1	0.2772	1.3e-05	8.9e-05	SLCO3A1	0.4741	2.27e-10	2.8e-09
SLCO4C1	-0.526	0.00136	0.01957	SLCO4C1	0.4202	0.0066	0.02005	SLCO4C1	0.946	1.99e-07	1.4e-06
SLFN12	-0.206	0.00425	0.04047	SLFN12	0.4368	2.1e-10	3.3e-09	SLFN12	0.6426	2.11e-15	4.7e-14
SMOX	-0.218	0.00053	0.01024	SMOX	0.2306	9.9e-05	0.00055	SMOX	0.4482	1.4e-10	1.8e-09
SMPDL3B	-0.524	3.5e-06	0.00035	SMPDL3B	0.4183	8.3e-05	0.00047	SMPDL3B	0.9422	7.8e-14	1.5e-12
SMS	-0.168	0.00027	0.00639	SMS	0.147	0.00073	0.00312	SMS	0.3153	8e-10	9.1e-09
SNPH	-0.236	0.00169	0.02274	SNPH	0.2037	0.00401	0.01321	SNPH	0.4395	1.3e-07	9.7e-07
SORBS2	0.2527	0.00202	0.02549	SORBS2	-0.318	4e-05	0.00025	SORBS2	-0.57	3.89e-10	4.6e-09
SOX4	-0.438	8.8e-05	0.00302	SOX4	0.3098	0.00317	0.01082	SOX4	0.7474	1.6e-09	1.8e-08
SP140	-0.225	0.00322	0.03386	SP140	0.8226	9.9e-28	7.4e-26	SP140	1.0475	3.42e-32	3.2e-30
SPI1	-0.157	0.00011	0.00358	SPI1	0.4861	2.5e-33	4e-31	SPI1	0.6428	3.95e-41	1e-38
SPP1	-0.702	6.5e-05	0.00247	SPP1	0.7183	1.5e-05	0.0001	SPP1	1.4207	4.74e-13	8.4e-12
SPSB3	0.3206	1.2e-06	0.00017	SPSB3	-0.165	0.00753	0.02232	SPSB3	-0.486	3.37e-11	4.6e-10
SRD5A1	0.2259	0.00356	0.03594	SRD5A1	-0.197	0.00702	0.02107	SRD5A1	-0.423	8.34e-07	5.2e-06
SRI	-0.194	0.00162	0.02204	SRI	0.1963	0.00072	0.00308	SRI	0.3902	1.12e-08	1.1e-07
SSBP2	-0.333	8.1e-05	0.00285	SSBP2	0.2357	0.00304	0.01044	SSBP2	0.5689	1.34e-09	1.5e-08
STAT1	-0.193	0.00167	0.02254	STAT1	0.3627	5.8e-10	8.6e-09	STAT1	0.5556	8.54e-16	2e-14
STK17B	-0.255	5.9e-07	0.00011	STK17B	0.4804	3.3e-22	1.5e-20	STK17B	0.7356	2.56e-35	3.4e-33
STK39	-0.531	7.9e-07	0.00013	STK39	0.313	0.00191	0.00706	STK39	0.8443	1.7e-12	2.8e-11
STK4	-0.073	0.00137	0.01957	STK4	0.0611	0.00459	0.01481	STK4	0.1344	1.16e-07	8.9e-07
STX3	-0.144	0.00507	0.04545	STX3	0.1309	0.00676	0.02042	STX3	0.2746	1.31e-06	7.9e-06
STX7	-0.225	6.5e-06	0.00051	STX7	0.154	0.00104	0.00424	STX7	0.3792	8.81e-12	1.3e-10
SYK	-0.184	0.00065	0.01206	SYK	0.7126	3.4e-39	1.1e-36	SYK	0.8968	1.94e-44	8.9e-42
TAF5L	0.1027	0.00236	0.0279	TAF5L	-0.075	0.0189	0.04763	TAF5L	-0.177	2.06e-06	1.2e-05
TBC1D1	-0.157	3.6e-05	0.00161	TBC1D1	0.0863	0.01581	0.04128	TBC1D1	0.2436	7.63e-09	7.4e-08
TCEAL1	0.2513	8.4e-07	0.00014	TCEAL1	-0.122	0.01089	0.03031	TCEAL1	-0.373	4.35e-11	6e-10
TCFL5	0.2751	3.8e-06	0.00037	TCFL5	-0.179	0.00134	0.00525	TCFL5	-0.454	6.7e-12	1e-10
TCTA	0.1301	0.00184	0.02389	TCTA	-0.139	0.00043	0.00198	TCTA	-0.269	6.89e-09	6.7e-08
TDGF1	0.7767	1.6e-05	0.00093	TDGF1	-0.424	0.01204	0.03302	TDGF1	-1.201	1.78e-09	1.9e-08
TES	-0.204	0.00552	0.04817	TES	0.2851	4.1e-05	0.00025	TES	0.4889	2.21e-09	2.4e-08
THOP1	0.1384	0.003	0.03263	THOP1	-0.116	0.00817	0.02383	THOP1	-0.255	8.14e-07	5.1e-06
TLR2	-0.339	2e-05	0.00108	TLR2	0.6992	1.2e-19	4.2e-18	TLR2	1.0387	9.31e-30	6.7e-28
TM9SF1	0.1441	0.00094	0.01545	TM9SF1	-0.121	0.00316	0.01079	TM9SF1	-0.265	3.97e-08	3.3e-07
TMEM144	-0.269	0.00091	0.01513	TMEM144	0.2405	0.00163	0.00621	TMEM144	0.5092	1.47e-08	1.4e-07
TMEM164	-0.257	3.4e-05	0.00154	TMEM164	0.2414	3.7e-05	0.00023	TMEM164	0.4987	5.88e-13	1e-11
TMEM51	-0.22	0.00231	0.0275	TMEM51	0.4676	1.4e-11	2.4e-10	TMEM51	0.6879	3.42e-17	9.1e-16
TMEM80	0.1033	0.00236	0.0279	TMEM80	-0.097	0.00243	0.00867	TMEM80	-0.2	1.03e-07	8e-07
TMPRSS6	0.2921	0.00149	0.02081	TMPRSS6	-0.241	0.00545	0.01706	TMPRSS6	-0.533	1.7e-07	1.2e-06
TMSB10	-0.335	7.1e-09	4.3e-06	TMSB10	0.3512	1.4e-10	2.2e-09	TMSB10	0.686	1.49e-25	7.5e-24
TMSB4X	-0.167	2.9e-05	0.00136	TMSB4X	0.3424	9.1e-19	3e-17	TMSB4X	0.5097	1.57e-28	1e-26
TNFAIP3	-0.194	0.00271	0.03035	TNFAIP3	0.2631	1.7e-05	0.00012	TNFAIP3	0.4569	2.24e-10	2.8e-09
TNFAIP8	-0.281	1.7e-05	0.00095	TNFAIP8	0.7878	6.6e-34	1.1e-31	TNFAIP8	1.0683	1.34e-43	5.4e-41
TNFRSF11A	-0.297	0.00022	0.0057	TNFRSF11A	0.3643	1.7e-06	1.5e-05	TNFRSF11A	0.6618	1.92e-13	3.6e-12
TNFRSF11B	-0.352	0.0057	0.04905	TNFRSF11B	0.7169	3.6e-09	4.9e-08	TNFRSF11B	1.0691	7.53e-14	1.5e-12
TNFRSF21	-0.38	8.4e-06	0.00059	TNFRSF21	0.3436	1.9e-05	0.00013	TNFRSF21	0.7231	3.03e-14	6.1e-13
TOB1	0.1873	0.00037	0.00819	TOB1	-0.166	0.00081	0.00341	TOB1	-0.353	1.51e-09	1.7e-08
TOR1AIP1	0.1711	0.0002	0.00536	TOR1AIP1	-0.165	0.00015	0.00077	TOR1AIP1	-0.336	5.53e-11	7.5e-10
TP53I3	-0.402	2.7e-07	6.3e-05	TP53I3	-0.173	0.01811	0.046	TP53I3	0.2289	0.007275	0.01703
TPBG	-0.349	0.00462	0.04275	TPBG	0.5853	5.8e-07	5.3e-06	TPBG	0.9346	1.17e-11	1.7e-10
TPPP	0.2781	0.00282	0.03119	TPPP	-0.229	0.00891	0.0256	TPPP	-0.508	8.48e-07	5.3e-06
TRAC	-0.239	0.00024	0.00589	TRAC	0.6318	2.6e-23	1.3e-21	TRAC	0.8711	5.12e-31	4.1e-29
TRAF3	-0.114	0.00181	0.02364	TRAF3	0.1555	7.1e-06	5.3e-05	TRAF3	0.2696	3.89e-11	5.4e-10
TRAPPC6A	0.1446	0.00293	0.03213	TRAPPC6A	-0.18	8.8e-05	0.0005	TRAPPC6A	-0.325	1.9e-09	2.1e-08
TREM2	-0.224	0.00321	0.03386	TREM2	0.4646	1.6e-10	2.5e-09	TREM2	0.6885	8.39e-16	2e-14
TRIM26	0.1028	0.00309	0.03322	TRIM26	-0.119	0.0003	0.00142	TRIM26	-0.222	9.49e-09	9.1e-08
TRIP12	-0.095	0.00405	0.0391	TRIP12	0.0742	0.01726	0.04422	TRIP12	0.1693	3.72e-06	2e-05
TRPS1	-0.41	2.7e-06	0.00029	TRPS1	0.2123	0.00952	0.02704	TRPS1	0.6225	1.32e-10	1.7e-09
TSC2	0.1343	0.00022	0.00572	TSC2	-0.085	0.01296	0.03516	TSC2	-0.219	5.25e-08	4.3e-07
TSPAN3	-0.212	5.4e-05	0.00217	TSPAN3	0.1552	0.00169	0.00639	TSPAN3	0.3673	3.09e-10	3.7e-09
TST	0.1448	0.00556	0.04837	TST	-0.255	2.9e-07	2.8e-06	TST	-0.399	7.95e-12	1.2e-10
TTPA	0.2981	0.00502	0.04525	TTPA	-0.328	0.00106	0.00431	TTPA	-0.627	1.07e-07	8.2e-07
TXNRD2	0.1083	0.00174	0.02309	TXNRD2	-0.1	0.00205	0.00751	TXNRD2	-0.209	5.2e-08	4.3e-07
TXNRD3	0.119	0.00111	0.0173	TXNRD3	-0.103	0.00286	0.00993	TXNRD3	-0.222	4.39e-08	3.7e-07
TYROBP	-0.273	2.6e-06	0.00029	TYROBP	0.7685	1.2e-39	4.4e-37	TYROBP	1.0413	1.05e-50	1.6e-47
UBE2D1	-0.135	0.00024	0.00596	UBE2D1	0.1191	0.00061	0.00266	UBE2D1	0.2545	5.3e-10	6.2e-09
UBE2E1	-0.089	0.00288	0.03173	UBE2E1	0.0985	0.00046	0.00207	UBE2E1	0.1872	1.48e-08	1.4e-07
UBE2L6	-0.166	0.00325	0.03402	UBE2L6	0.3738	5.2e-12	9.5e-11	UBE2L6	0.5402	2.63e-17	7.1e-16
UBE2Z	-0.123	0.00061	0.01149	UBE2Z	0.0956	0.00467	0.01504	UBE2Z	0.2187	3.9e-08	3.3e-07
UBR2	0.1435	0.00011	0.00351	UBR2	-0.092	0.00801	0.02347	UBR2	-0.236	9.59e-09	9.2e-08
UCP2	-0.288	1.3e-07	3.7e-05	UCP2	0.6598	3.5e-34	6.4e-32	UCP2	0.9482	2.5e-48	2.1e-45
UNC13B	0.124	0.00178	0.0234	UNC13B	-0.094	0.0117	0.03219	UNC13B	-0.218	6.77e-07	4.4e-06
UPB1	0.459	0.00354	0.0359	UPB1	-0.463	0.00183	0.00681	UPB1	-0.922	1.28e-07	9.7e-07
VAMP4	0.1149	0.00119	0.01807	VAMP4	-0.11	0.00105	0.00429	VAMP4	-0.224	1.18e-08	1.1e-07
VCAM1	-0.422	0.0016	0.02189	VCAM1	0.6153	1.2e-06	1e-05	VCAM1	1.0369	3.78e-12	6e-11
VNN2	-0.378	0.00503	0.04527	VNN2	0.6827	1e-07	1.1e-06	VNN2	1.0611	2.08e-12	3.4e-11
VRK2	-0.174	0.0008	0.01407	VRK2	0.116	0.01738	0.04442	VRK2	0.2897	4.4e-07	3e-06
VSIG4	-0.263	0.00127	0.01887	VSIG4	0.8612	7.3e-27	4.8e-25	VSIG4	1.1238	1.62e-32	1.6e-30
WDR1	-0.097	0.00176	0.02319	WDR1	0.0937	0.0013	0.00512	WDR1	0.1903	2.83e-08	2.5e-07
WIPF1	-0.156	0.00061	0.01145	WIPF1	0.5559	2.8e-34	5.2e-32	WIPF1	0.7123	4.01e-40	8.8e-38
WSB1	-0.189	9.7e-05	0.00326	WSB1	0.1309	0.00407	0.01338	WSB1	0.3199	2.69e-09	2.8e-08
XCL1	-0.395	0.00026	0.00626	XCL1	0.3686	0.0003	0.00144	XCL1	0.7635	2.15e-10	2.7e-09
YAF2	0.1018	0.00402	0.03887	YAF2	-0.08	0.01695	0.0435	YAF2	-0.181	3.58e-06	2e-05
YBX1	-0.166	4.1e-05	0.00178	YBX1	0.1187	0.00179	0.00668	YBX1	0.2843	2.35e-10	2.9e-09
YEATS2	-0.134	0.00551	0.04817	YEATS2	0.1441	0.00161	0.00615	YEATS2	0.2784	2.13e-07	1.5e-06
YIPF3	0.1717	1.2e-05	0.00077	YIPF3	-0.097	0.0086	0.02488	YIPF3	-0.269	7.05e-10	8.1e-09
YWHAB	-0.135	1.7e-05	0.00094	YWHAB	0.1361	4.6e-06	3.6e-05	YWHAB	0.2716	1.22e-14	2.6e-13
YWHAZ	-0.151	0.00445	0.0418	YWHAZ	0.1856	0.00021	0.00105	YWHAZ	0.3363	1.11e-08	1.1e-07
ZAP70	-0.193	0.00379	0.03751	ZAP70	0.6818	2.9e-25	1.7e-23	ZAP70	0.8753	9.5e-30	6.8e-28
ZBTB7B	0.071	0.00255	0.02932	ZBTB7B	-0.06	0.00653	0.01989	ZBTB7B	-0.131	4.7e-07	3.1e-06
ZDHHC13	-0.44	5.7e-08	2.4e-05	ZDHHC13	0.2388	0.00164	0.00623	ZDHHC13	0.6787	5.22e-14	1e-12
ZKSCAN1	0.1286	0.00304	0.03295	ZKSCAN1	-0.261	3.1e-10	4.7e-09	ZKSCAN1	-0.389	1.51e-15	3.4e-14
ZNF14	-0.254	0.00245	0.02859	ZNF14	0.2067	0.00892	0.02561	ZNF14	0.4609	6.98e-07	4.5e-06
ZNF212	0.137	0.0001	0.00334	ZNF212	-0.139	2.9e-05	0.00018	ZNF212	-0.276	2.19e-12	3.6e-11
ZNF215	-0.302	0.0022	0.02681	ZNF215	0.2975	0.00138	0.00537	ZNF215	0.5993	4.25e-08	3.6e-07
ZNF281	0.2015	0.00015	0.00437	ZNF281	-0.173	0.00053	0.00238	ZNF281	-0.375	2.24e-10	2.8e-09
ZNF430	-0.318	0.00023	0.00589	ZNF430	0.2023	0.01282	0.03484	ZNF430	0.5206	5.43e-08	4.5e-07
ZNF500	0.1206	0.00013	0.00395	ZNF500	-0.096	0.00131	0.00512	ZNF500	-0.216	7.05e-10	8.1e-09
ZNF76	0.0896	0.00317	0.03372	ZNF76	-0.137	2e-06	1.7e-05	ZNF76	-0.226	2.44e-11	3.4e-10
ZNHIT1	0.1162	0.0046	0.04261	ZNHIT1	-0.143	0.00022	0.00108	ZNHIT1	-0.26	1.24e-08	1.2e-07
ZXDC	0.1603	1.5e-05	0.00087	ZXDC	-0.117	0.00073	0.00312	ZXDC	-0.278	1.46e-11	2.1e-10

## Sheet: Table S3
Table S3: GSVA enrichment features of the hallmark gene set among the three gene clusters
id	logFC	AveExpr	t	P.Value	adj.P.Val	B
HALLMARK_COAGULATION	0.201585	0.00474963	7.59479	1.13514e-13	5.67569e-12	20.3814
HALLMARK_COMPLEMENT	0.155991	0.000539499	6.45481	2.18178e-10	5.45446e-09	13.0163
HALLMARK_XENOBIOTIC_METABOLISM	0.144062	0.0144165	5.98303	3.69711e-09	5.13637e-08	10.2731
HALLMARK_IL2_STAT5_SIGNALING	0.12581	0.00021358	5.96482	4.1091e-09	5.13637e-08	10.1708
HALLMARK_KRAS_SIGNALING_UP	0.132602	0.00400234	5.6361	2.63867e-08	2.63867e-07	8.37418
HALLMARK_IL6_JAK_STAT3_SIGNALING	0.155489	0.0006954	5.2994	1.61516e-07	1.34597e-06	6.62939
HALLMARK_SPERMATOGENESIS	-0.0951858	0.018143	-5.0978	4.56564e-07	3.26117e-06	5.63166
HALLMARK_ALLOGRAFT_REJECTION	0.17601	-0.00524352	5.06684	5.3393e-07	3.33706e-06	5.48158
HALLMARK_INTERFERON_GAMMA_RESPONSE	0.175049	-0.00170428	4.6866	3.41466e-06	1.89703e-05	3.70745
HALLMARK_INFLAMMATORY_RESPONSE	0.135239	0.00165698	4.60553	4.99116e-06	2.49558e-05	3.34579
HALLMARK_BILE_ACID_METABOLISM	0.10659	0.0160105	4.56645	5.98119e-06	2.71872e-05	3.17355
HALLMARK_ESTROGEN_RESPONSE_LATE	0.0656071	-0.00141432	4.45309	1.00341e-05	4.18089e-05	2.68176
HALLMARK_DNA_REPAIR	-0.112282	-0.0172975	-4.375	1.42374e-05	5.47592e-05	2.34975
HALLMARK_ESTROGEN_RESPONSE_EARLY	0.0750833	-0.00151869	4.31053	1.89308e-05	6.761e-05	2.07975
HALLMARK_CHOLESTEROL_HOMEOSTASIS	0.127233	-0.00170738	4.06453	5.4298e-05	0.000180993	1.08442
HALLMARK_APOPTOSIS	0.0793202	-0.00356623	3.91832	9.90511e-05	0.000309535	0.519115
HALLMARK_MYC_TARGETS_V1	-0.128346	-0.026825	-3.77097	0.000178117	0.000523872	-0.0306337
HALLMARK_UV_RESPONSE_UP	0.0577794	-0.00322419	3.73666	0.000203639	0.000565664	-0.155774
HALLMARK_G2M_CHECKPOINT	-0.146373	-0.0202797	-3.68596	0.000247722	0.0006519	-0.338672
HALLMARK_APICAL_SURFACE	0.0850755	-0.00104185	3.61337	0.000326662	0.000816655	-0.596376
HALLMARK_INTERFERON_ALPHA_RESPONSE	0.148377	-0.00498734	3.49846	0.000501345	0.00119368	-0.994265
HALLMARK_REACTIVE_OXYGEN_SPECIES_PATHWAY	0.0931461	-0.0064571	3.33074	0.000917385	0.00208497	-1.55277
HALLMARK_E2F_TARGETS	-0.150661	-0.0189645	-3.29648	0.00103474	0.00224943	-1.66361
HALLMARK_MITOTIC_SPINDLE	-0.0884366	-0.0161918	-3.10683	0.00197719	0.00411915	-2.25713
HALLMARK_FATTY_ACID_METABOLISM	0.0688182	0.0126426	2.88448	0.00405624	0.00810059	-2.90951
HALLMARK_EPITHELIAL_MESENCHYMAL_TRANSITION	0.102134	-0.00435742	2.87241	0.00421231	0.00810059	-2.94357
HALLMARK_PEROXISOME	0.0481671	0.00646497	2.50656	0.0124452	0.0230467	-3.90995
HALLMARK_MYOGENESIS	0.0556835	0.00618387	2.46913	0.0138118	0.0246639	-4.00157
HALLMARK_APICAL_JUNCTION	0.0459045	-0.00116731	2.42976	0.0153908	0.0265359	-4.09648
HALLMARK_ANGIOGENESIS	0.0741486	-0.00609882	2.21451	0.027155	0.0452584	-4.58884
HALLMARK_TNFA_SIGNALING_VIA_NFKB	0.064407	-0.00814012	2.07045	0.0388218	0.0626159	-4.89328
HALLMARK_PROTEIN_SECRETION	-0.0559331	-0.00883458	-2.04499	0.0412765	0.0644945	-4.945
HALLMARK_MYC_TARGETS_V2	-0.076126	-0.0231495	-1.98995	0.0470332	0.0712624	-5.0546
HALLMARK_ADIPOGENESIS	0.0445406	0.00629801	1.88118	0.0604139	0.088844	-5.26255
HALLMARK_ANDROGEN_RESPONSE	0.0384949	-0.00254723	1.83002	0.0677246	0.0967494	-5.35635
HALLMARK_P53_PATHWAY	0.029329	-0.006926	1.73474	0.0832822	0.11567	-5.52425
HALLMARK_HYPOXIA	0.0327687	-0.0077029	1.57274	0.116286	0.157143	-5.78928
HALLMARK_PANCREAS_BETA_CELLS	0.0310671	0.0331193	1.42078	0.155882	0.205108	-6.01449
HALLMARK_GLYCOLYSIS	0.0242132	-0.00427647	1.32394	0.18601	0.238474	-6.14615
HALLMARK_HEME_METABOLISM	-0.0191096	-0.000203926	-1.30887	0.191062	0.238827	-6.1658
HALLMARK_UNFOLDED_PROTEIN_RESPONSE	-0.0262075	-0.01385	-1.16637	0.243913	0.297455	-6.34062
HALLMARK_NOTCH_SIGNALING	0.0279974	-0.0106046	1.05157	0.293407	0.349294	-6.46688
HALLMARK_OXIDATIVE_PHOSPHORYLATION	0.0260368	-0.00643926	0.834042	0.404578	0.470439	-6.67037
HALLMARK_WNT_BETA_CATENIN_SIGNALING	0.0199731	-0.00999371	0.781867	0.43459	0.493852	-6.71221
HALLMARK_TGF_BETA_SIGNALING	-0.0160615	-0.0100368	-0.548609	0.58347	0.648301	-6.8663
HALLMARK_HEDGEHOG_SIGNALING	-0.0108011	-0.00719938	-0.400044	0.689262	0.749197	-6.93629
HALLMARK_KRAS_SIGNALING_DN	-0.00445155	0.027873	-0.28829	0.773221	0.822576	-6.97451
HALLMARK_UV_RESPONSE_DN	0.00371449	-0.00318066	0.140288	0.888478	0.907419	-7.00602
HALLMARK_MTORC1_SIGNALING	0.00328195	-0.00984316	0.133366	0.893947	0.907419	-7.00696
HALLMARK_PI3K_AKT_MTOR_SIGNALING	-0.00207482	-0.0076126	-0.116342	0.907419	0.907419	-7.00907

## Sheet: Table S4
Table S4: Identity document of all patients in this study
TCGA	Type	GSE14520	Type	ICGC	Type
TCGA_TCGA-DD-A39X-11A	Normal	GSE_N-003B-GSM712536	Normal	SP99137-DO45207-T	Tumor
TCGA_TCGA-DD-A1EC-11A	Normal	GSE_N-004B-GSM362985	Normal	SP99213-DO45245-T	Tumor
TCGA_TCGA-DD-A1EL-11A	Normal	GSE_N-006B-GSM712537	Normal	SP50153-DO23536-T	Tumor
TCGA_TCGA-DD-A39W-11A	Normal	GSE_N-007B-GSM362990	Normal	SP50139-DO23529-T	Tumor
TCGA_TCGA-DD-A3A5-11A	Normal	GSE_N-008B-GSM363155	Normal	SP99325-DO45299-T	Tumor
TCGA_TCGA-DD-A3A3-11A	Normal	GSE_N-009B-GSM363138	Normal	SP98913-DO45097-T	Tumor
TCGA_TCGA-DD-A39V-11A	Normal	GSE_N-011B-GSM363221	Normal	SP50149-DO23534-T	Tumor
TCGA_TCGA-BC-A110-11A	Normal	GSE_N-012B-GSM363307	Normal	SP99053-DO45165-T	Tumor
TCGA_TCGA-DD-A3A1-11A	Normal	GSE_N-014B-GSM363381	Normal	SP112184-DO45139-T	Tumor
TCGA_TCGA-DD-A1EB-11A	Normal	GSE_N-015B-GSM363088	Normal	SP50109-DO23514-T	Tumor
TCGA_TCGA-DD-A1EI-11A	Normal	GSE_N-016B-GSM363262	Normal	SP99077-DO45177-T	Tumor
TCGA_TCGA-BC-A10R-11A	Normal	GSE_N-018B-GSM363006	Normal	SP98985-DO45133-T	Tumor
TCGA_TCGA-DD-A1EH-11A	Normal	GSE_N-020B-GSM363119	Normal	SP99189-DO45233-T	Tumor
TCGA_TCGA-DD-A11C-11A	Normal	GSE_N-021B-GSM363210	Normal	SP99113-DO45195-T	Tumor
TCGA_TCGA-DD-A1EJ-11A	Normal	GSE_N-022B-GSM363286	Normal	SP99065-DO45171-T	Tumor
TCGA_TCGA-DD-A3A4-11A	Normal	GSE_N-023B-GSM363025	Normal	SP107104-DO48733-T	Tumor
TCGA_TCGA-BC-A10Y-11A	Normal	GSE_N-024B-GSM363000	Normal	SP99275-DO45275-T	Tumor
TCGA_TCGA-DD-A113-11A	Normal	GSE_N-025B-GSM363300	Normal	SP112208-DO50813-T	Tumor
TCGA_TCGA-DD-A1EG-11A	Normal	GSE_N-026B-GSM712538	Normal	SP99173-DO45225-T	Tumor
TCGA_TCGA-G3-A3CH-11A	Normal	GSE_N-027B-GSM363303	Normal	SP99237-DO45257-T	Tumor
TCGA_TCGA-BC-A10X-11A	Normal	GSE_N-028B-GSM363257	Normal	SP98900-DO45093-T	Tumor
TCGA_TCGA-DD-A39Z-11A	Normal	GSE_N-031B-GSM363261	Normal	SP107136-DO48751-T	Tumor
TCGA_TCGA-BC-A10W-11A	Normal	GSE_N-032B-GSM363258	Normal	SP112228-DO50822-T	Tumor
TCGA_TCGA-BD-A3EP-11A	Normal	GSE_N-033B-GSM363111	Normal	SP98959-DO45121-T	Tumor
TCGA_TCGA-FV-A3I0-11A	Normal	GSE_N-034B-GSM363181	Normal	SP107004-DO48677-T	Tumor
TCGA_TCGA-DD-A3A8-11A	Normal	GSE_N-035B-GSM363027	Normal	SP107007-DO48679-T	Tumor
TCGA_TCGA-DD-A116-11A	Normal	GSE_N-036B-GSM363287	Normal	SP50159-DO23539-T	Tumor
TCGA_TCGA-FV-A23B-11A	Normal	GSE_N-038B-GSM363246	Normal	SP98896-DO45091-T	Tumor
TCGA_TCGA-FV-A3I1-11A	Normal	GSE_N-039B-GSM362951	Normal	SP112192-DO50805-T	Tumor
TCGA_TCGA-BC-A10Q-11A	Normal	GSE_N-040B-GSM363096	Normal	SP107132-DO48747-T	Tumor
TCGA_TCGA-DD-A11D-11A	Normal	GSE_N-041B-GSM363199	Normal	SP99229-DO45253-T	Tumor
TCGA_TCGA-FV-A2QR-11A	Normal	GSE_N-042B-GSM363005	Normal	SP99221-DO45249-T	Tumor
TCGA_TCGA-DD-A11A-11A	Normal	GSE_N-043B-GSM363197	Normal	SP107109-DO48736-T	Tumor
TCGA_TCGA-DD-A3A2-11A	Normal	GSE_N-044B-GSM363201	Normal	SP107056-DO48706-T	Tumor
TCGA_TCGA-BD-A2L6-11A	Normal	GSE_N-045B-GSM363120	Normal	SP98967-DO45125-T	Tumor
TCGA_TCGA-EP-A12J-11A	Normal	GSE_N-046B-GSM363045	Normal	SP99109-DO45193-T	Tumor
TCGA_TCGA-DD-A3A6-11A	Normal	GSE_N-047B-GSM363165	Normal	SP50185-DO23552-T	Tumor
TCGA_TCGA-EP-A26S-11A	Normal	GSE_N-048B-GSM363306	Normal	SP99011-DO45145-T	Tumor
TCGA_TCGA-DD-A118-11A	Normal	GSE_N-049B-GSM363157	Normal	SP99271-DO45273-T	Tumor
TCGA_TCGA-DD-A119-11A	Normal	GSE_N-050B-GSM363259	Normal	SP107037-DO48695-T	Tumor
TCGA_TCGA-DD-A1EE-11A	Normal	GSE_N-051B-GSM363319	Normal	SP99089-DO45183-T	Tumor
TCGA_TCGA-BC-A216-11A	Normal	GSE_N-054B-GSM363281	Normal	SP107101-DO48732-T	Tumor
TCGA_TCGA-BC-A10Z-11A	Normal	GSE_N-056B-GSM363324	Normal	SP107091-DO48727-T	Tumor
TCGA_TCGA-FV-A3R2-11A	Normal	GSE_N-057B-GSM363133	Normal	SP107123-DO48743-T	Tumor
TCGA_TCGA-ES-A2HT-11A	Normal	GSE_N-061B-GSM363159	Normal	SP99037-DO45157-T	Tumor
TCGA_TCGA-DD-A114-11A	Normal	GSE_N-062B-GSM363007	Normal	SP107152-DO48760-T	Tumor
TCGA_TCGA-BC-A10T-11A	Normal	GSE_N-063B-GSM363282	Normal	SP112288-DO50850-T	Tumor
TCGA_TCGA-EP-A3RK-11A	Normal	GSE_N-064B-GSM363242	Normal	SP112304-DO50857-T	Tumor
TCGA_TCGA-BC-A10U-11A	Normal	GSE_N-065B-GSM363063	Normal	SP112300-DO50855-T	Tumor
TCGA_TCGA-DD-A11B-11A	Normal	GSE_N-066B-GSM363301	Normal	SP107063-DO48712-T	Tumor
TCGA_TCGA-DD-A4NG-01A	Tumor	GSE_N-067B-GSM363061	Normal	SP112219-DO50818-T	Tumor
TCGA_TCGA-G3-AAV4-01A	Tumor	GSE_N-068B-GSM362955	Normal	SP99209-DO45243-T	Tumor
TCGA_TCGA-2Y-A9H1-01A	Tumor	GSE_N-069B-GSM363091	Normal	SP50107-DO23513-T	Tumor
TCGA_TCGA-BC-A10Y-01A	Tumor	GSE_N-071B-GSM363231	Normal	SP99279-DO45277-T	Tumor
TCGA_TCGA-K7-AAU7-01A	Tumor	GSE_N-072B-GSM363359	Normal	SP112188-DO50803-T	Tumor
TCGA_TCGA-BC-A10W-01A	Tumor	GSE_N-073B-GSM363065	Normal	SP99169-DO45223-T	Tumor
TCGA_TCGA-DD-AACV-01A	Tumor	GSE_N-074B-GSM363134	Normal	SP99097-DO45187-T	Tumor
TCGA_TCGA-DD-AAD3-01A	Tumor	GSE_N-075B-GSM363167	Normal	SP107010-DO48681-T	Tumor
TCGA_TCGA-DD-A1EI-01A	Tumor	GSE_N-076B-GSM362957	Normal	SP99045-DO45161-T	Tumor
TCGA_TCGA-DD-AAC9-01A	Tumor	GSE_N-078B-GSM363141	Normal	SP112138-DO50778-T	Tumor
TCGA_TCGA-DD-AACT-01A	Tumor	GSE_N-079B-GSM362961	Normal	SP99185-DO45231-T	Tumor
TCGA_TCGA-GJ-A6C0-01A	Tumor	GSE_N-083B-GSM362967	Normal	SP107111-DO48737-T	Tumor
TCGA_TCGA-CC-5258-01A	Tumor	GSE_N-084B-GSM363216	Normal	SP99321-DO45297-T	Tumor
TCGA_TCGA-DD-AADP-01A	Tumor	GSE_N-085B-GSM362973	Normal	SP50105-DO23512-T	Tumor
TCGA_TCGA-DD-AACW-01A	Tumor	GSE_N-086B-GSM363024	Normal	SP99033-DO45155-T	Tumor
TCGA_TCGA-ZS-A9CD-01A	Tumor	GSE_N-089B-GSM363175	Normal	SP112276-DO50845-T	Tumor
TCGA_TCGA-UB-A7MF-01A	Tumor	GSE_N-090B-GSM363162	Normal	SP112168-DO50793-T	Tumor
TCGA_TCGA-WX-AA46-01A	Tumor	GSE_N-091B-GSM362979	Normal	SP99069-DO45173-T	Tumor
TCGA_TCGA-CC-A8HV-01A	Tumor	GSE_N-092B-GSM362962	Normal	SP99105-DO45191-T	Tumor
TCGA_TCGA-DD-AADQ-01A	Tumor	GSE_N-093B-GSM363370	Normal	SP112221-DO50819-T	Tumor
TCGA_TCGA-DD-AADB-01A	Tumor	GSE_N-094B-GSM363114	Normal	SP112273-DO50844-T	Tumor
TCGA_TCGA-DD-A1EA-01A	Tumor	GSE_N-095B-GSM362968	Normal	SP112182-DO50800-T	Tumor
TCGA_TCGA-5R-AA1C-01A	Tumor	GSE_N-096B-GSM362974	Normal	SP107088-DO48725-T	Tumor
TCGA_TCGA-DD-A113-01A	Tumor	GSE_N-097B-GSM363372	Normal	SP50157-DO23538-T	Tumor
TCGA_TCGA-2Y-A9H9-01A	Tumor	GSE_N-099B-GSM362980	Normal	SP99003-DO45141-T	Tumor
TCGA_TCGA-CC-A7IE-01A	Tumor	GSE_N-100B-GSM363279	Normal	SP112186-DO50802-T	Tumor
TCGA_TCGA-XR-A8TD-01A	Tumor	GSE_N-101B-GSM362963	Normal	SP107071-DO48716-T	Tumor
TCGA_TCGA-DD-AAD2-01A	Tumor	GSE_N-102B-GSM362969	Normal	SP50167-DO23543-T	Tumor
TCGA_TCGA-DD-AACY-01A	Tumor	GSE_N-103B-GSM362975	Normal	SP98898-DO45092-T	Tumor
TCGA_TCGA-CC-A7IF-01A	Tumor	GSE_N-104B-GSM363373	Normal	SP112234-DO50825-T	Tumor
TCGA_TCGA-DD-AACD-01A	Tumor	GSE_N-105B-GSM362981	Normal	SP112215-DO50816-T	Tumor
TCGA_TCGA-ED-A4XI-01A	Tumor	GSE_N-106B-GSM363338	Normal	SP112241-DO50829-T	Tumor
TCGA_TCGA-CC-A9FW-01A	Tumor	GSE_N-107B-GSM363340	Normal	SP112190-DO50804-T	Tumor
TCGA_TCGA-G3-A5SJ-01A	Tumor	GSE_N-108B-GSM363219	Normal	SP107076-DO48719-T	Tumor
TCGA_TCGA-DD-AAE2-01A	Tumor	GSE_N-109B-GSM363342	Normal	SP99125-DO45201-T	Tumor
TCGA_TCGA-G3-A7M9-01A	Tumor	GSE_N-110B-GSM363323	Normal	SP99153-DO45215-T	Tumor
TCGA_TCGA-EP-A2KC-01A	Tumor	GSE_N-117B-GSM363277	Normal	SP99305-DO45289-T	Tumor
TCGA_TCGA-2Y-A9GS-01A	Tumor	GSE_N-118B-GSM363090	Normal	SP112213-DO50815-T	Tumor
TCGA_TCGA-ED-A7PX-01A	Tumor	GSE_N-119B-GSM363185	Normal	SP99337-DO45305-T	Tumor
TCGA_TCGA-DD-AADC-01A	Tumor	GSE_N-120B-GSM363021	Normal	SP107052-DO48704-T	Tumor
TCGA_TCGA-DD-AAVZ-01A	Tumor	GSE_N-121B-GSM363302	Normal	SP50163-DO23541-T	Tumor
TCGA_TCGA-CC-A3MA-01A	Tumor	GSE_N-122B-GSM362998	Normal	SP112178-DO50798-T	Tumor
TCGA_TCGA-2Y-A9GY-01A	Tumor	GSE_N-123B-GSM362989	Normal	SP99289-DO45281-T	Tumor
TCGA_TCGA-ED-A627-01A	Tumor	GSE_N-125B-GSM362995	Normal	SP50133-DO23526-T	Tumor
TCGA_TCGA-2Y-A9GW-01A	Tumor	GSE_N-127B-GSM362996	Normal	SP191990-DO227643-T	Tumor
TCGA_TCGA-DD-AADO-01A	Tumor	GSE_N-128B-GSM712539	Normal	SP98973-DO45127-T	Tumor
TCGA_TCGA-DD-AADK-01A	Tumor	GSE_N-129B-GSM363212	Normal	SP99205-DO45241-T	Tumor
TCGA_TCGA-DD-A1EH-01A	Tumor	GSE_N-130B-GSM362999	Normal	SP99157-DO45217-T	Tumor
TCGA_TCGA-G3-AAV7-01A	Tumor	GSE_N-131B-GSM363131	Normal	SP192707-DO227801-T	Tumor
TCGA_TCGA-DD-AACA-01A	Tumor	GSE_N-132B-GSM363040	Normal	SP98981-DO45131-T	Tumor
TCGA_TCGA-FV-A3R3-01A	Tumor	GSE_N-134B-GSM363137	Normal	SP50173-DO23546-T	Tumor
TCGA_TCGA-KR-A7K0-01A	Tumor	GSE_N-135B-GSM362991	Normal	SP98921-DO45101-T	Tumor
TCGA_TCGA-DD-AACC-01A	Tumor	GSE_N-136B-GSM362997	Normal	SP99061-DO45169-T	Tumor
TCGA_TCGA-BC-A3KG-01A	Tumor	GSE_N-137B-GSM363345	Normal	SP192387-DO45147-T	Tumor
TCGA_TCGA-G3-AAV2-01A	Tumor	GSE_N-138B-GSM363347	Normal	SP99287-DO45281-T	Tumor
TCGA_TCGA-CC-A7IK-01A	Tumor	GSE_N-139B-GSM363349	Normal	SP50171-DO23545-T	Tumor
TCGA_TCGA-G3-A25S-01A	Tumor	GSE_N-140B-GSM363374	Normal	SP50131-DO23525-T	Tumor
TCGA_TCGA-DD-AADR-01A	Tumor	GSE_N-142B-GSM363351	Normal	SP99093-DO45185-T	Tumor
TCGA_TCGA-UB-A7MD-01A	Tumor	GSE_N-143B-GSM363177	Normal	SP50151-DO23535-T	Tumor
TCGA_TCGA-DD-A4NS-01A	Tumor	GSE_N-144B-GSM363068	Normal	SP50103-DO23511-T	Tumor
TCGA_TCGA-CC-A9FU-01A	Tumor	GSE_N-145B-GSM363240	Normal	SP99161-DO45219-T	Tumor
TCGA_TCGA-DD-AAE3-01A	Tumor	GSE_N-146B-GSM363325	Normal	SP112180-DO50799-T	Tumor
TCGA_TCGA-DD-AACP-01A	Tumor	GSE_N-147B-GSM363139	Normal	SP107073-DO48717-T	Tumor
TCGA_TCGA-2Y-A9H8-01A	Tumor	GSE_N-148B-GSM363305	Normal	SP112224-DO50820-T	Tumor
TCGA_TCGA-FV-A3I1-01A	Tumor	GSE_N-149B-GSM363095	Normal	SP50155-DO23537-T	Tumor
TCGA_TCGA-2Y-A9H7-01A	Tumor	GSE_N-150B-GSM363375	Normal	SP98989-DO45135-T	Tumor
TCGA_TCGA-DD-AAVU-01A	Tumor	GSE_N-151B-GSM363163	Normal	SP50143-DO23531-T	Tumor
TCGA_TCGA-BC-A110-01A	Tumor	GSE_N-152B-GSM363060	Normal	SP107078-DO48720-T	Tumor
TCGA_TCGA-ZP-A9CZ-01A	Tumor	GSE_N-153B-GSM363004	Normal	SP107041-DO48697-T	Tumor
TCGA_TCGA-DD-AAE1-01A	Tumor	GSE_N-154B-GSM363020	Normal	SP99341-DO45307-T	Tumor
TCGA_TCGA-GJ-A3OU-01A	Tumor	GSE_N-156B-GSM363160	Normal	SP107084-DO48723-T	Tumor
TCGA_TCGA-RC-A7SB-01A	Tumor	GSE_N-157B-GSM363304	Normal	SP98925-DO45103-T	Tumor
TCGA_TCGA-DD-AAVS-01A	Tumor	GSE_N-158B-GSM363058	Normal	SP112310-DO50859-T	Tumor
TCGA_TCGA-CC-A8HS-01A	Tumor	GSE_N-159B-GSM363043	Normal	SP98997-DO45139-T	Tumor
TCGA_TCGA-FV-A3I0-01A	Tumor	GSE_N-160B-GSM363135	Normal	SP99073-DO45175-T	Tumor
TCGA_TCGA-2Y-A9GT-01A	Tumor	GSE_N-161B-GSM363238	Normal	SP98927-DO45105-T	Tumor
TCGA_TCGA-2Y-A9HA-01A	Tumor	GSE_N-162B-GSM363380	Normal	SP112201-DO50809-T	Tumor
TCGA_TCGA-FV-A2QQ-01A	Tumor	GSE_N-163B-GSM363173	Normal	SP99333-DO45303-T	Tumor
TCGA_TCGA-DD-AAEH-01A	Tumor	GSE_N-164B-GSM363112	Normal	SP112248-DO50832-T	Tumor
TCGA_TCGA-DD-AADM-01A	Tumor	GSE_N-165B-GSM363321	Normal	SP107129-DO48746-T	Tumor
TCGA_TCGA-G3-A3CK-01A	Tumor	GSE_N-166B-GSM363382	Normal	SP99121-DO45199-T	Tumor
TCGA_TCGA-EP-A26S-01A	Tumor	GSE_N-167B-GSM363256	Normal	SP107047-DO48701-T	Tumor
TCGA_TCGA-DD-A11A-01A	Tumor	GSE_N-168B-GSM712540	Normal	SP112261-DO50839-T	Tumor
TCGA_TCGA-DD-AAE6-01A	Tumor	GSE_N-169B-GSM363097	Normal	SP50137-DO23528-T	Tumor
TCGA_TCGA-XR-A8TE-01A	Tumor	GSE_N-170B-GSM363227	Normal	SP99019-DO45149-T	Tumor
TCGA_TCGA-DD-A73B-01A	Tumor	GSE_N-171B-GSM363117	Normal	SP107097-DO48730-T	Tumor
TCGA_TCGA-EP-A3JL-01A	Tumor	GSE_N-172B-GSM363156	Normal	SP106993-DO48672-T	Tumor
TCGA_TCGA-CC-A3MB-01A	Tumor	GSE_N-173B-GSM363253	Normal	SP99257-DO45267-T	Tumor
TCGA_TCGA-DD-AAD0-01A	Tumor	GSE_N-174B-GSM363203	Normal	SP106998-DO48674-T	Tumor
TCGA_TCGA-MI-A75I-01A	Tumor	GSE_N-177B-GSM363026	Normal	SP50177-DO23548-T	Tumor
TCGA_TCGA-DD-AACZ-01A	Tumor	GSE_N-178B-GSM363191	Normal	SP112170-DO50793-T	Tumor
TCGA_TCGA-CC-A8HU-01A	Tumor	GSE_N-179B-GSM363136	Normal	SP99007-DO45143-T	Tumor
TCGA_TCGA-RC-A6M5-01A	Tumor	GSE_N-180B-GSM363002	Normal	SP99081-DO45179-T	Tumor
TCGA_TCGA-2Y-A9GZ-01A	Tumor	GSE_N-181B-GSM712541	Normal	SP99193-DO45235-T	Tumor
TCGA_TCGA-DD-AACO-01A	Tumor	GSE_N-182B-GSM363250	Normal	SP112211-DO50814-T	Tumor
TCGA_TCGA-LG-A6GG-01A	Tumor	GSE_N-183B-GSM363003	Normal	SP50127-DO23523-T	Tumor
TCGA_TCGA-BC-4073-01B	Tumor	GSE_N-184B-GSM363187	Normal	SP192714-DO50814-T	Tumor
TCGA_TCGA-ED-A7PZ-01A	Tumor	GSE_N-185B-GSM363019	Normal	SP99249-DO45263-T	Tumor
TCGA_TCGA-DD-A4NV-01A	Tumor	GSE_N-188B-GSM363018	Normal	SP50123-DO23521-T	Tumor
TCGA_TCGA-DD-A73G-01A	Tumor	GSE_N-190B-GSM363089	Normal	SP99149-DO45213-T	Tumor
TCGA_TCGA-G3-AAV3-01A	Tumor	GSE_N-191B-GSM363116	Normal	SP112205-DO50811-T	Tumor
TCGA_TCGA-G3-A25U-01A	Tumor	GSE_N-192B-GSM363285	Normal	SP107121-DO48742-T	Tumor
TCGA_TCGA-BC-A5W4-01A	Tumor	GSE_N-193B-GSM363206	Normal	SP192726-DO50859-T	Tumor
TCGA_TCGA-UB-AA0U-01A	Tumor	GSE_N-194B-GSM363225	Normal	SP107150-DO48759-T	Tumor
TCGA_TCGA-EP-A12J-01A	Tumor	GSE_N-195B-GSM363233	Normal	SP99177-DO45227-T	Tumor
TCGA_TCGA-G3-A5SI-01A	Tumor	GSE_N-196B-GSM363353	Normal	SP99301-DO45287-T	Tumor
TCGA_TCGA-FV-A4ZQ-01A	Tumor	GSE_N-197B-GSM363252	Normal	SP99181-DO45229-T	Tumor
TCGA_TCGA-DD-A4ND-01A	Tumor	GSE_N-198B-GSM363214	Normal	SP98953-DO45117-T	Tumor
TCGA_TCGA-ED-A8O5-01A	Tumor	GSE_N-199B-GSM363179	Normal	SP99049-DO45163-T	Tumor
TCGA_TCGA-UB-A7ME-01A	Tumor	GSE_N-200B-GSM363234	Normal	SP50145-DO23532-T	Tumor
TCGA_TCGA-CC-5264-01A	Tumor	GSE_N-201B-GSM363132	Normal	SP107155-DO48761-T	Tumor
TCGA_TCGA-DD-AADA-01A	Tumor	GSE_N-203B-GSM363189	Normal	SP107032-DO48693-T	Tumor
TCGA_TCGA-2Y-A9HB-01A	Tumor	GSE_N-204B-GSM363229	Normal	SP99133-DO45205-T	Tumor
TCGA_TCGA-DD-AACS-01A	Tumor	GSE_N-205B-GSM363041	Normal	SP112160-DO50789-T	Tumor
TCGA_TCGA-DD-AAE0-01A	Tumor	GSE_N-206B-GSM363236	Normal	SP99201-DO45239-T	Tumor
TCGA_TCGA-G3-A5SK-01A	Tumor	GSE_N-208B-GSM363322	Normal	SP107068-DO48715-T	Tumor
TCGA_TCGA-BC-A69I-01A	Tumor	GSE_N-209B-GSM363062	Normal	SP99101-DO45189-T	Tumor
TCGA_TCGA-BC-A10R-01A	Tumor	GSE_N-210B-GSM363093	Normal	SP99329-DO45301-T	Tumor
TCGA_TCGA-BC-A10X-01A	Tumor	GSE_N-211B-GSM363064	Normal	SP99233-DO45255-T	Tumor
TCGA_TCGA-BC-A10S-01A	Tumor	GSE_N-212B-GSM363001	Normal	SP107012-DO48682-T	Tumor
TCGA_TCGA-DD-AAVX-01A	Tumor	GSE_N-213B-GSM363110	Normal	SP112130-DO50774-T	Tumor
TCGA_TCGA-DD-AAVQ-01A	Tumor	GSE_N-215B-GSM363208	Normal	SP99269-DO45273-T	Tumor
TCGA_TCGA-RC-A7SH-01A	Tumor	GSE_N-216B-GSM363397	Normal	SP99085-DO45181-T	Tumor
TCGA_TCGA-G3-A3CJ-01A	Tumor	GSE_N-219B-GSM363223	Normal	SP50117-DO23518-T	Tumor
TCGA_TCGA-DD-A115-01A	Tumor	GSE_N-222B-GSM363284	Normal	SP112196-DO50807-T	Tumor
TCGA_TCGA-BC-A10Q-01A	Tumor	GSE_N-223B-GSM363299	Normal	SP98933-DO45107-T	Tumor
TCGA_TCGA-DD-A1EE-01A	Tumor	GSE_N-224B-GSM363140	Normal	SP50135-DO23527-T	Tumor
TCGA_TCGA-ZP-A9CY-01A	Tumor	GSE_N-227B-GSM363044	Normal	SP112147-DO50783-T	Tumor
TCGA_TCGA-FV-A23B-01A	Tumor	GSE_N-228B-GSM363280	Normal	SP50101-DO23510-T	Tumor
TCGA_TCGA-HP-A5MZ-01A	Tumor	GSE_N-230B-GSM363066	Normal	SP99217-DO45247-T	Tumor
TCGA_TCGA-DD-AACK-01A	Tumor	GSE_N-231B-GSM363356	Normal	SP107080-DO48721-T	Tumor
TCGA_TCGA-CC-A1HT-01A	Tumor	GSE_N-234B-GSM363092	Normal	SP98937-DO45109-T	Tumor
TCGA_TCGA-DD-A11B-01A	Tumor	GSE_N-236B-GSM363244	Normal	SP50111-DO23515-T	Tumor
TCGA_TCGA-ZP-A9D4-01A	Tumor	GSE_N-237B-GSM363059	Normal	SP98955-DO45119-T	Tumor
TCGA_TCGA-HP-A5N0-01A	Tumor	GSE_N-238B-GSM363023	Normal	SP112217-DO50817-T	Tumor
TCGA_TCGA-EP-A2KB-01A	Tumor	GSE_N-240B-GSM363254	Normal	SP50161-DO23540-T	Tumor
TCGA_TCGA-DD-A4NN-01A	Tumor	GSE_N-241B-GSM363402	Normal	SP98965-DO45123-T	Tumor
TCGA_TCGA-ES-A2HS-01A	Tumor	GSE_N-243B-GSM363320	Normal	SP99297-DO45285-T	Tumor
TCGA_TCGA-G3-A3CG-01A	Tumor	GSE_N-245B-GSM363113	Normal	SP112152-DO50785-T	Tumor
TCGA_TCGA-DD-AAVR-01A	Tumor	GSE_N-247B-GSM363318	Normal	SP98991-DO45137-T	Tumor
TCGA_TCGA-DD-AAD1-01A	Tumor	GSE_N-248B-GSM363407	Normal	SP50175-DO23547-T	Tumor
TCGA_TCGA-DD-A73D-01A	Tumor	GSE_N-249B-GSM363118	Normal	SP99197-DO45237-T	Tumor
TCGA_TCGA-DD-AAVW-01A	Tumor	GSE_N-253B-GSM363153	Normal	SP99057-DO45167-T	Tumor
TCGA_TCGA-DD-A4NF-01A	Tumor	GSE_N-254B-GSM362953	Normal	SP99001-DO45141-T	Tumor
TCGA_TCGA-DD-AACN-01A	Tumor	GSE_N-259B-GSM363417	Normal	SP99283-DO45279-T	Tumor
TCGA_TCGA-DD-A3A2-01A	Tumor	GSE_N-260B-GSM363308	Normal	SP99245-DO45261-T	Tumor
TCGA_TCGA-K7-A5RF-01A	Tumor	GSE_N-261B-GSM363195	Normal	SP99225-DO45251-T	Tumor
TCGA_TCGA-DD-A116-01A	Tumor	GSE_N-262B-GSM363067	Normal	SP50115-DO23517-T	Tumor
TCGA_TCGA-DD-A4NI-01A	Tumor	GSE_N-263B-GSM363361	Normal	SP99241-DO45259-T	Tumor
TCGA_TCGA-BC-A10T-01A	Tumor	GSE_N-264B-GSM363171	Normal	SP192418-DO45173-T	Tumor
TCGA_TCGA-DD-AADJ-01A	Tumor	GSE_N-265B-GSM363094	Normal	SP50129-DO23524-T	Tumor
TCGA_TCGA-DD-AACE-01A	Tumor	GSE_N-266B-GSM363255	Normal	SP98949-DO45115-T	Tumor
TCGA_TCGA-FV-A3R2-01A	Tumor	GSE_N-267B-GSM363278	Normal	SP112165-DO50791-T	Tumor
TCGA_TCGA-DD-AAE7-01A	Tumor	GSE_N-268B-GSM363283	Normal	SP50181-DO23550-T	Tumor
TCGA_TCGA-DD-AADD-01A	Tumor	GSE_N-269B-GSM363363	Normal	SP98902-DO45094-T	Tumor
TCGA_TCGA-4R-AA8I-01A	Tumor	GSE_N-270B-GSM363248	Normal	SP99253-DO45265-T	Tumor
TCGA_TCGA-FV-A496-01A	Tumor	GSE_N-272B-GSM363047	Normal	SP107146-DO48757-T	Tumor
TCGA_TCGA-DD-A39X-01A	Tumor	GSE_N-273B-GSM363365	Normal	SP98907-DO45096-T	Tumor
TCGA_TCGA-DD-AADS-01A	Tumor	GSE_N-274B-GSM363042	Normal	SP50119-DO23519-T	Tumor
TCGA_TCGA-DD-AAE9-01A	Tumor	GSE_N-275B-GSM363028	Normal	SP50169-DO23544-T	Tumor
TCGA_TCGA-G3-AAUZ-01A	Tumor	GSE_N-277B-GSM363276	Normal	SP107044-DO48700-T	Tumor
TCGA_TCGA-WX-AA47-01A	Tumor	GSE_N-278B-GSM363183	Normal	SP99145-DO45211-T	Tumor
TCGA_TCGA-NI-A4U2-01A	Tumor	GSE_N-279B-GSM363154	Normal	SP112194-DO50806-T	Tumor
TCGA_TCGA-DD-AACI-01A	Tumor	GSE_N-281B-GSM363103	Normal	SP98945-DO45113-T	Tumor
TCGA_TCGA-ZP-A9D1-01A	Tumor	GSE_N-282B-GSM363161	Normal	SP112156-DO50787-T	Tumor
TCGA_TCGA-UB-A7MB-01A	Tumor	GSE_N-283B-GSM363046	Normal	SP50183-DO23551-T	Tumor
TCGA_TCGA-DD-AAVP-01A	Tumor	GSE_N-284B-GSM363193	Normal	SP50147-DO23533-T	Tumor
TCGA_TCGA-DD-A4NR-01A	Tumor	GSE_N-285B-GSM363260	Normal	SP99265-DO45139-T	Tumor
TCGA_TCGA-RG-A7D4-01A	Tumor	GSE_N-286B-GSM363022	Normal	SP112210-DO50814-T	Tumor
TCGA_TCGA-5R-AAAM-01A	Tumor	GSE_N-289B-GSM363367	Normal	SP99029-DO45153-T	Tumor
TCGA_TCGA-DD-A3A4-01A	Tumor	GSE_N-290B-GSM363369	Normal	SP99041-DO45159-T	Tumor
TCGA_TCGA-BC-A217-01A	Tumor	GSE_N-291B-GSM363158	Normal	SP99293-DO45283-T	Tumor
TCGA_TCGA-RC-A6M3-01A	Tumor	GSE_N-333B-GSM363421	Normal	SP50179-DO23549-T	Tumor
TCGA_TCGA-DD-A4NQ-01A	Tumor	GSE_N-339B-GSM363423	Normal	SP99129-DO45203-T	Tumor
TCGA_TCGA-CC-A9FV-01A	Tumor	GSE_N-341B-GSM363425	Normal	SP98915-DO45099-T	Tumor
TCGA_TCGA-UB-A7MC-01A	Tumor	GSE_N-342B-GSM712533	Normal	SP112198-DO50808-T	Tumor
TCGA_TCGA-MR-A8JO-01A	Tumor	GSE_N-343B-GSM363427	Normal	SP107094-DO48728-T	Tumor
TCGA_TCGA-DD-AAEG-01A	Tumor	GSE_N-344B-GSM363429	Normal	SP112265-DO50840-T	Tumor
TCGA_TCGA-DD-A39W-01A	Tumor	GSE_N-346B-GSM363431	Normal	SP99117-DO45197-T	Tumor
TCGA_TCGA-DD-A39Z-01A	Tumor	GSE_N-347B-GSM363433	Normal	SP99261-DO45269-T	Tumor
TCGA_TCGA-BC-A10Z-01A	Tumor	GSE_N-362B-GSM712535	Normal	SP107119-DO48741-T	Tumor
TCGA_TCGA-WQ-AB4B-01A	Tumor	GSE_N-393B-GSM363435	Normal	SP98941-DO45111-T	Tumor
TCGA_TCGA-CC-A123-01A	Tumor	GSE_N-400B-GSM363437	Normal	SP98904-DO45095-T	Tumor
TCGA_TCGA-YA-A8S7-01A	Tumor	GSE_N-401B-GSM363439	Normal	SP50141-DO23530-T	Tumor
TCGA_TCGA-2Y-A9H2-01A	Tumor	GSE_N-403B-GSM363441	Normal	SP98909-DO45096-T	Tumor
TCGA_TCGA-5C-A9VG-01A	Tumor	GSE_N-406B-GSM363443	Normal	SP50165-DO23542-T	Tumor
TCGA_TCGA-CC-A3M9-01A	Tumor	GSE_N-415B-GSM363445	Normal	SP99141-DO45209-T	Tumor
TCGA_TCGA-EP-A2KA-01A	Tumor	GSE_N-424B-GSM363447	Normal	SP99165-DO45221-T	Tumor
TCGA_TCGA-DD-AADW-01A	Tumor	GSE_N-426B-GSM363449	Normal	SP50097-DO23508-T	Tumor
TCGA_TCGA-DD-AAED-01A	Tumor	GSE_N-mal1-GSM363450	Normal	SP112133-DO50776-T	Tumor
TCGA_TCGA-LG-A9QD-01A	Tumor	GSE_N-mal2-GSM363451	Normal	SP98975-DO45129-T	Tumor
TCGA_TCGA-DD-AADV-01A	Tumor	GSE_T-002A-GSM363251	Tumor	SP50113-DO23516-T	Tumor
TCGA_TCGA-G3-A3CH-01A	Tumor	GSE_T-004A-GSM362983	Tumor	SP50099-DO23509-T	Tumor
TCGA_TCGA-G3-AAV1-01A	Tumor	GSE_T-005A-GSM362947	Tumor
TCGA_TCGA-ZS-A9CG-01A	Tumor	GSE_T-007A-GSM362987	Tumor
TCGA_TCGA-DD-AAW3-01A	Tumor	GSE_T-008A-GSM363145	Tumor
TCGA_TCGA-ED-A7PY-01A	Tumor	GSE_T-009A-GSM363128	Tumor
TCGA_TCGA-ZP-A9D2-01A	Tumor	GSE_T-010A-GSM363169	Tumor
TCGA_TCGA-G3-A25Y-01A	Tumor	GSE_T-011A-GSM363218	Tumor
TCGA_TCGA-G3-A3CI-01A	Tumor	GSE_T-012A-GSM363296	Tumor
TCGA_TCGA-K7-A5RG-01A	Tumor	GSE_T-014A-GSM363034	Tumor
TCGA_TCGA-EP-A3RK-01A	Tumor	GSE_T-015A-GSM363078	Tumor
TCGA_TCGA-CC-A7IJ-01A	Tumor	GSE_T-016A-GSM363336	Tumor
TCGA_TCGA-MI-A75H-01A	Tumor	GSE_T-018A-GSM363075	Tumor
TCGA_TCGA-G3-AAV5-01A	Tumor	GSE_T-019A-GSM362948	Tumor
TCGA_TCGA-ED-A7XP-01A	Tumor	GSE_T-020A-GSM363108	Tumor
TCGA_TCGA-DD-A1ED-01A	Tumor	GSE_T-021A-GSM363209	Tumor
TCGA_TCGA-ED-A5KG-01A	Tumor	GSE_T-022A-GSM363274	Tumor
TCGA_TCGA-ED-A459-01A	Tumor	GSE_T-023A-GSM363014	Tumor
TCGA_TCGA-2Y-A9GX-01A	Tumor	GSE_T-024A-GSM363069	Tumor
TCGA_TCGA-DD-A73E-01A	Tumor	GSE_T-025A-GSM363288	Tumor
TCGA_TCGA-QA-A7B7-01A	Tumor	GSE_T-027A-GSM363292	Tumor
TCGA_TCGA-DD-AACL-01A	Tumor	GSE_T-028A-GSM363331	Tumor
TCGA_TCGA-MR-A520-01A	Tumor	GSE_T-029A-GSM362949	Tumor
TCGA_TCGA-DD-A1EF-01A	Tumor	GSE_T-031A-GSM363335	Tumor
TCGA_TCGA-G3-A25T-01A	Tumor	GSE_T-032A-GSM363332	Tumor
TCGA_TCGA-FV-A4ZP-01A	Tumor	GSE_T-033A-GSM363099	Tumor
TCGA_TCGA-WX-AA44-01A	Tumor	GSE_T-034A-GSM363180	Tumor
TCGA_TCGA-DD-A4NE-01A	Tumor	GSE_T-035A-GSM363017	Tumor
TCGA_TCGA-CC-A7IG-01A	Tumor	GSE_T-036A-GSM363237	Tumor
TCGA_TCGA-ZP-A9D0-01A	Tumor	GSE_T-038A-GSM363245	Tumor
TCGA_TCGA-G3-A25X-01A	Tumor	GSE_T-039A-GSM362950	Tumor
TCGA_TCGA-BC-4072-01B	Tumor	GSE_T-040A-GSM363085	Tumor
TCGA_TCGA-XR-A8TC-01A	Tumor	GSE_T-041A-GSM363198	Tumor
TCGA_TCGA-BC-A3KF-01A	Tumor	GSE_T-042A-GSM363074	Tumor
TCGA_TCGA-O8-A75V-01A	Tumor	GSE_T-043A-GSM363196	Tumor
TCGA_TCGA-DD-AADI-01A	Tumor	GSE_T-044A-GSM363200	Tumor
TCGA_TCGA-BC-A8YO-01A	Tumor	GSE_T-045A-GSM363109	Tumor
TCGA_TCGA-DD-A39V-01A	Tumor	GSE_T-046A-GSM363404	Tumor
TCGA_TCGA-DD-A1EC-01A	Tumor	GSE_T-047A-GSM363164	Tumor
TCGA_TCGA-DD-AACQ-01A	Tumor	GSE_T-048A-GSM363295	Tumor
TCGA_TCGA-DD-A1EB-01A	Tumor	GSE_T-049A-GSM363146	Tumor
TCGA_TCGA-KR-A7K7-01A	Tumor	GSE_T-050A-GSM363333	Tumor
TCGA_TCGA-DD-AAVV-01A	Tumor	GSE_T-051A-GSM363311	Tumor
TCGA_TCGA-DD-AADN-01A	Tumor	GSE_T-054A-GSM363269	Tumor
TCGA_TCGA-LG-A9QC-01A	Tumor	GSE_T-056A-GSM363316	Tumor
TCGA_TCGA-RC-A7S9-01A	Tumor	GSE_T-057A-GSM363123	Tumor
TCGA_TCGA-BC-A112-01A	Tumor	GSE_T-061A-GSM363104	Tumor
TCGA_TCGA-2Y-A9H0-01A	Tumor	GSE_T-062A-GSM363076	Tumor
TCGA_TCGA-CC-A7IL-01A	Tumor	GSE_T-063A-GSM363270	Tumor
TCGA_TCGA-KR-A7K2-01A	Tumor	GSE_T-064A-GSM363241	Tumor
TCGA_TCGA-DD-AADU-01A	Tumor	GSE_T-065A-GSM363052	Tumor
TCGA_TCGA-ED-A66Y-01A	Tumor	GSE_T-066A-GSM363289	Tumor
TCGA_TCGA-CC-A8HT-01A	Tumor	GSE_T-067A-GSM363050	Tumor
TCGA_TCGA-DD-AADY-01A	Tumor	GSE_T-068A-GSM362954	Tumor
TCGA_TCGA-BC-A216-01A	Tumor	GSE_T-069A-GSM363080	Tumor
TCGA_TCGA-RC-A7SF-01A	Tumor	GSE_T-071A-GSM363220	Tumor
TCGA_TCGA-RC-A7SK-01A	Tumor	GSE_T-072A-GSM363358	Tumor
TCGA_TCGA-DD-AAD8-01A	Tumor	GSE_T-073A-GSM363054	Tumor
TCGA_TCGA-DD-AAEE-01A	Tumor	GSE_T-074A-GSM363124	Tumor
TCGA_TCGA-DD-A119-01A	Tumor	GSE_T-075A-GSM363166	Tumor
TCGA_TCGA-G3-AAV6-01A	Tumor	GSE_T-076A-GSM362956	Tumor
TCGA_TCGA-DD-A73F-01A	Tumor	GSE_T-078A-GSM363130	Tumor
TCGA_TCGA-DD-A4NP-01A	Tumor	GSE_T-079A-GSM362958	Tumor
TCGA_TCGA-DD-AAEK-01A	Tumor	GSE_T-083A-GSM362964	Tumor
TCGA_TCGA-DD-A11D-01A	Tumor	GSE_T-084A-GSM363215	Tumor
TCGA_TCGA-DD-A1EG-01A	Tumor	GSE_T-085A-GSM362970	Tumor
TCGA_TCGA-PD-A5DF-01A	Tumor	GSE_T-086A-GSM363013	Tumor
TCGA_TCGA-DD-A3A9-01A	Tumor	GSE_T-088A-GSM363310	Tumor
TCGA_TCGA-2Y-A9H4-01A	Tumor	GSE_T-089A-GSM363174	Tumor
TCGA_TCGA-DD-A118-01A	Tumor	GSE_T-090A-GSM363151	Tumor
TCGA_TCGA-DD-A4NL-01A	Tumor	GSE_T-091A-GSM362976	Tumor
TCGA_TCGA-5C-A9VH-01A	Tumor	GSE_T-092A-GSM362959	Tumor
TCGA_TCGA-3K-AAZ8-01A	Tumor	GSE_T-093A-GSM363142	Tumor
TCGA_TCGA-MI-A75G-01A	Tumor	GSE_T-094A-GSM363115	Tumor
TCGA_TCGA-DD-A3A6-01A	Tumor	GSE_T-095A-GSM362965	Tumor
TCGA_TCGA-CC-A5UD-01A	Tumor	GSE_T-096A-GSM362971	Tumor
TCGA_TCGA-DD-A3A3-01A	Tumor	GSE_T-097A-GSM363371	Tumor
TCGA_TCGA-CC-A7IH-01A	Tumor	GSE_T-099A-GSM362977	Tumor
TCGA_TCGA-DD-A4NH-01A	Tumor	GSE_T-100A-GSM363267	Tumor
TCGA_TCGA-K7-A6G5-01A	Tumor	GSE_T-101A-GSM362960	Tumor
TCGA_TCGA-DD-AACU-01A	Tumor	GSE_T-102A-GSM362966	Tumor
TCGA_TCGA-BW-A5NO-01A	Tumor	GSE_T-103A-GSM362972	Tumor
TCGA_TCGA-XR-A8TG-01A	Tumor	GSE_T-104A-GSM363038	Tumor
TCGA_TCGA-DD-A1EJ-01A	Tumor	GSE_T-105A-GSM362978	Tumor
TCGA_TCGA-CC-5259-01A	Tumor	GSE_T-106A-GSM363337	Tumor
TCGA_TCGA-2Y-A9H3-01A	Tumor	GSE_T-107A-GSM363339	Tumor
TCGA_TCGA-UB-AA0V-01A	Tumor	GSE_T-108A-GSM363194	Tumor
TCGA_TCGA-GJ-A9DB-01A	Tumor	GSE_T-109A-GSM363341	Tumor
TCGA_TCGA-DD-A4NK-01A	Tumor	GSE_T-110A-GSM363315	Tumor
TCGA_TCGA-2Y-A9H6-01A	Tumor	GSE_T-116A-GSM363343	Tumor
TCGA_TCGA-BD-A2L6-01A	Tumor	GSE_T-117A-GSM363265	Tumor
TCGA_TCGA-G3-A5SM-01A	Tumor	GSE_T-118A-GSM363079	Tumor
TCGA_TCGA-DD-AAD5-01A	Tumor	GSE_T-119A-GSM363184	Tumor
TCGA_TCGA-BD-A3EP-01A	Tumor	GSE_T-120A-GSM363011	Tumor
TCGA_TCGA-CC-5260-01A	Tumor	GSE_T-121A-GSM363291	Tumor
TCGA_TCGA-WQ-A9G7-01A	Tumor	GSE_T-122A-GSM362982	Tumor
TCGA_TCGA-FV-A2QR-01A	Tumor	GSE_T-123A-GSM362986	Tumor
TCGA_TCGA-DD-AAW2-01A	Tumor	GSE_T-125A-GSM362992	Tumor
TCGA_TCGA-DD-AA3A-01A	Tumor	GSE_T-126A-GSM363297	Tumor
TCGA_TCGA-CC-5263-01A	Tumor	GSE_T-127A-GSM362993	Tumor
TCGA_TCGA-FV-A495-01A	Tumor	GSE_T-129A-GSM363211	Tumor
TCGA_TCGA-BC-A10U-01A	Tumor	GSE_T-130A-GSM362984	Tumor
TCGA_TCGA-ZS-A9CE-01A	Tumor	GSE_T-131A-GSM363121	Tumor
TCGA_TCGA-G3-A7M8-01A	Tumor	GSE_T-132A-GSM363029	Tumor
TCGA_TCGA-5R-AA1D-01A	Tumor	GSE_T-134A-GSM363127	Tumor
TCGA_TCGA-ED-A82E-01A	Tumor	GSE_T-135A-GSM362988	Tumor
TCGA_TCGA-DD-A3A1-01A	Tumor	GSE_T-136A-GSM362994	Tumor
TCGA_TCGA-MI-A75E-01A	Tumor	GSE_T-137A-GSM363344	Tumor
TCGA_TCGA-DD-AAEA-01A	Tumor	GSE_T-138A-GSM363346	Tumor
TCGA_TCGA-ZS-A9CF-01A	Tumor	GSE_T-139A-GSM363348	Tumor
TCGA_TCGA-G3-A25V-01A	Tumor	GSE_T-140A-GSM363016	Tumor
TCGA_TCGA-CC-A9FS-01A	Tumor	GSE_T-142A-GSM363350	Tumor
TCGA_TCGA-BC-A69H-01A	Tumor	GSE_T-143A-GSM363176	Tumor
TCGA_TCGA-DD-A3A7-01A	Tumor	GSE_T-144A-GSM363057	Tumor
TCGA_TCGA-CC-5261-01A	Tumor	GSE_T-145A-GSM363239	Tumor
TCGA_TCGA-G3-AAV0-01A	Tumor	GSE_T-146A-GSM363317	Tumor
TCGA_TCGA-DD-AAE4-01A	Tumor	GSE_T-147A-GSM363326	Tumor
TCGA_TCGA-CC-A7II-01A	Tumor	GSE_T-148A-GSM363294	Tumor
TCGA_TCGA-DD-A3A8-01A	Tumor	GSE_T-149A-GSM363084	Tumor
TCGA_TCGA-G3-A7M5-01A	Tumor	GSE_T-150A-GSM363033	Tumor
TCGA_TCGA-CC-A3MC-01A	Tumor	GSE_T-151A-GSM363152	Tumor
TCGA_TCGA-2V-A95S-01A	Tumor	GSE_T-152A-GSM363049	Tumor
TCGA_TCGA-ED-A66X-01A	Tumor	GSE_T-153A-GSM363073	Tumor
TCGA_TCGA-G3-A6UC-01A	Tumor	GSE_T-154A-GSM363010	Tumor
TCGA_TCGA-BD-A3ER-01A	Tumor	GSE_T-156A-GSM363149	Tumor
TCGA_TCGA-DD-A3A5-01A	Tumor	GSE_T-157A-GSM363293	Tumor
TCGA_TCGA-DD-AACH-01A	Tumor	GSE_T-158A-GSM363376	Tumor
TCGA_TCGA-CC-5262-01A	Tumor	GSE_T-159A-GSM363032	Tumor
TCGA_TCGA-DD-AADG-01A	Tumor	GSE_T-160A-GSM363125	Tumor
TCGA_TCGA-DD-AAW0-01A	Tumor	GSE_T-161A-GSM363378	Tumor
TCGA_TCGA-DD-AACJ-01A	Tumor	GSE_T-162A-GSM363037	Tumor
TCGA_TCGA-DD-AADL-01A	Tumor	GSE_T-163A-GSM363172	Tumor
TCGA_TCGA-RC-A6M6-01A	Tumor	GSE_T-164A-GSM363100	Tumor
TCGA_TCGA-DD-A4NO-01A	Tumor	GSE_T-165A-GSM363313	Tumor
TCGA_TCGA-CC-A5UE-01A	Tumor	GSE_T-166A-GSM363204	Tumor
TCGA_TCGA-G3-A7M7-01A	Tumor	GSE_T-167A-GSM363330	Tumor
TCGA_TCGA-ES-A2HT-01A	Tumor	GSE_T-169A-GSM363086	Tumor
TCGA_TCGA-DD-AACX-01A	Tumor	GSE_T-170A-GSM363226	Tumor
TCGA_TCGA-2Y-A9GV-01A	Tumor	GSE_T-171A-GSM363106	Tumor
TCGA_TCGA-DD-AACF-01A	Tumor	GSE_T-172A-GSM363384	Tumor
TCGA_TCGA-BW-A5NP-01A	Tumor	GSE_T-173A-GSM363327	Tumor
TCGA_TCGA-UB-A7MA-01A	Tumor	GSE_T-174A-GSM363202	Tumor
TCGA_TCGA-G3-A25Z-01A	Tumor	GSE_T-175A-GSM363275	Tumor
TCGA_TCGA-MI-A75C-01A	Tumor	GSE_T-177A-GSM363015	Tumor
TCGA_TCGA-DD-A4NA-01A	Tumor	GSE_T-178A-GSM363190	Tumor
TCGA_TCGA-ZP-A9CV-01A	Tumor	GSE_T-179A-GSM363126	Tumor
TCGA_TCGA-T1-A6J8-01A	Tumor	GSE_T-180A-GSM363071	Tumor
TCGA_TCGA-DD-A1EK-01A	Tumor	GSE_T-182A-GSM363249	Tumor
TCGA_TCGA-5C-AAPD-01A	Tumor	GSE_T-183A-GSM363072	Tumor
TCGA_TCGA-KR-A7K8-01A	Tumor	GSE_T-184A-GSM363186	Tumor
TCGA_TCGA-DD-AAD6-01A	Tumor	GSE_T-185A-GSM363009	Tumor
TCGA_TCGA-DD-A4NB-01A	Tumor	GSE_T-188A-GSM363008	Tumor
TCGA_TCGA-DD-A11C-01A	Tumor	GSE_T-189A-GSM363263	Tumor
TCGA_TCGA-WJ-A86L-01A	Tumor	GSE_T-190A-GSM712542	Tumor
TCGA_TCGA-ED-A8O6-01A	Tumor	GSE_T-191A-GSM363105	Tumor
TCGA_TCGA-DD-AAEB-01A	Tumor	GSE_T-192A-GSM363273	Tumor
TCGA_TCGA-2Y-A9GU-01A	Tumor	GSE_T-193A-GSM363205	Tumor
TCGA_TCGA-DD-A73A-01A	Tumor	GSE_T-194A-GSM363224	Tumor
TCGA_TCGA-RC-A6M4-01A	Tumor	GSE_T-195A-GSM363232	Tumor
TCGA_TCGA-BW-A5NQ-01A	Tumor	GSE_T-196A-GSM363352	Tumor
TCGA_TCGA-DD-AAVY-01A	Tumor	GSE_T-197A-GSM363386	Tumor
TCGA_TCGA-DD-A1EL-01A	Tumor	GSE_T-198A-GSM363213	Tumor
TCGA_TCGA-DD-A4NJ-01A	Tumor	GSE_T-199A-GSM363178	Tumor
TCGA_TCGA-G3-A5SL-01A	Tumor	GSE_T-200A-GSM363388	Tumor
TCGA_TCGA-DD-AACG-01A	Tumor	GSE_T-201A-GSM363391	Tumor
TCGA_TCGA-DD-AAC8-01A	Tumor	GSE_T-203A-GSM363188	Tumor
TCGA_TCGA-ED-A7XO-01A	Tumor	GSE_T-204A-GSM363228	Tumor
TCGA_TCGA-DD-AACB-01A	Tumor	GSE_T-205A-GSM363030	Tumor
TCGA_TCGA-G3-A7M6-01A	Tumor	GSE_T-206A-GSM363235	Tumor
TCGA_TCGA-ED-A97K-01A	Tumor	GSE_T-207A-GSM363354	Tumor
TCGA_TCGA-DD-A73C-01A	Tumor	GSE_T-208A-GSM363314	Tumor
TCGA_TCGA-DD-AAW1-01A	Tumor	GSE_T-209A-GSM363051	Tumor
TCGA_TCGA-XR-A8TF-01A	Tumor	GSE_T-210A-GSM363082	Tumor
TCGA_TCGA-CC-A5UC-01A	Tumor	GSE_T-211A-GSM363053	Tumor
TCGA_TCGA-DD-A39Y-01A	Tumor	GSE_T-212A-GSM363070	Tumor
TCGA_TCGA-DD-A114-01A	Tumor	GSE_T-213A-GSM363098	Tumor
TCGA_TCGA-NI-A8LF-01A	Tumor	GSE_T-215A-GSM363207	Tumor
TCGA_TCGA-DD-AADF-01A	Tumor	GSE_T-216A-GSM363393	Tumor
TCGA_TCGA-DD-AAEI-01A	Tumor	GSE_T-219A-GSM363222	Tumor
TCGA_TCGA-2Y-A9H5-01A	Tumor	GSE_T-222A-GSM363272	Tumor
		GSE_T-223A-GSM363101	Tumor
		GSE_T-224A-GSM363129	Tumor
		GSE_T-227A-GSM363035	Tumor
		GSE_T-228A-GSM363268	Tumor
		GSE_T-230A-GSM363055	Tumor
		GSE_T-231A-GSM363355	Tumor
		GSE_T-234A-GSM363081	Tumor
		GSE_T-236A-GSM363243	Tumor
		GSE_T-237A-GSM363048	Tumor
		GSE_T-238A-GSM363400	Tumor
		GSE_T-240A-GSM363328	Tumor
		GSE_T-241A-GSM363122	Tumor
		GSE_T-243A-GSM363312	Tumor
		GSE_T-245A-GSM363102	Tumor
		GSE_T-247A-GSM363309	Tumor
		GSE_T-248A-GSM363290	Tumor
		GSE_T-249A-GSM363107	Tumor
		GSE_T-250A-GSM363217	Tumor
		GSE_T-251A-GSM363357	Tumor
		GSE_T-253A-GSM363143	Tumor
		GSE_T-254A-GSM362952	Tumor
		GSE_T-256A-GSM363087	Tumor
		GSE_T-259A-GSM363168	Tumor
		GSE_T-260A-GSM363298	Tumor
		GSE_T-261A-GSM363230	Tumor
		GSE_T-262A-GSM363056	Tumor
		GSE_T-263A-GSM363360	Tumor
		GSE_T-264A-GSM363170	Tumor
		GSE_T-265A-GSM363083	Tumor
		GSE_T-266A-GSM363329	Tumor
		GSE_T-267A-GSM363266	Tumor
		GSE_T-268A-GSM363271	Tumor
		GSE_T-269A-GSM363362	Tumor
		GSE_T-270A-GSM363247	Tumor
		GSE_T-272A-GSM363039	Tumor
		GSE_T-273A-GSM363364	Tumor
		GSE_T-274A-GSM363031	Tumor
		GSE_T-275A-GSM363077	Tumor
		GSE_T-277A-GSM363264	Tumor
		GSE_T-278A-GSM363182	Tumor
		GSE_T-279A-GSM363144	Tumor
		GSE_T-281A-GSM363148	Tumor
		GSE_T-282A-GSM363150	Tumor
		GSE_T-283A-GSM363036	Tumor
		GSE_T-284A-GSM363192	Tumor
		GSE_T-285A-GSM363334	Tumor
		GSE_T-286A-GSM363012	Tumor
		GSE_T-289A-GSM363366	Tumor
		GSE_T-290A-GSM363368	Tumor
		GSE_T-291A-GSM363147	Tumor
		GSE_T-333A-GSM363420	Tumor
		GSE_T-339A-GSM363422	Tumor
		GSE_T-341A-GSM363424	Tumor
		GSE_T-342A-GSM712532	Tumor
		GSE_T-343A-GSM363426	Tumor
		GSE_T-344A-GSM363428	Tumor
		GSE_T-346A-GSM363430	Tumor
		GSE_T-347A-GSM363432	Tumor
		GSE_T-362A-GSM712534	Tumor
		GSE_T-393A-GSM363434	Tumor
		GSE_T-400A-GSM363436	Tumor
		GSE_T-401A-GSM363438	Tumor
		GSE_T-403A-GSM363440	Tumor
		GSE_T-406A-GSM363442	Tumor
		GSE_T-415A-GSM363444	Tumor
		GSE_T-424A-GSM363446	Tumor
		GSE_T-426A-GSM363448	Tumor

## Sheet: Table S5
Table S5: Clinical characteristics of the patients employed in this study
Id	Age	Gender	TNM staging	Survival years	Survival status
TCGA-KR-A7K0	65	MALE	Stage I	0.178082	Dead
TCGA-DD-A4NS	61	FEMALE	Stage I	6.72877	Dead
TCGA-DD-AAED	51	MALE	Stage I	2.09041	Alive
TCGA-DD-AADB	51	MALE	Stage I	3.40274	Alive
TCGA-G3-A25V	68	MALE	Stage I	2.35616	Alive
TCGA-DD-AAE7	72	MALE	Stage I	1.76438	Alive
TCGA-LG-A9QC	48	MALE	Stage I	1.16438	Alive
TCGA-DD-AAEH	73	MALE	Stage I	2.14795	Alive
TCGA-2Y-A9H9	70	MALE	Stage I	1.90959	Alive
TCGA-DD-A73B	72	FEMALE	Stage I	0.775342	Dead
TCGA-UB-A7MD	67	MALE	Stage I	0.142466	Dead
TCGA-5C-A9VH	70	MALE	Stage I	0.882192	Alive
TCGA-ED-A627	74	MALE	Stage I	1.1589	Alive
TCGA-G3-AAV2	50	MALE	Stage I	1.01918	Alive
TCGA-GJ-A9DB	68	MALE	Stage I	0.183562	Dead
TCGA-G3-AAV4	83	FEMALE	Stage I	0.0739726	Dead
TCGA-DD-AADP	45	MALE	Stage I	1.25479	Alive
TCGA-DD-A4NL	46	MALE	Stage I	4.68767	Alive
TCGA-2Y-A9GW	64	MALE	Stage I	3.48219	Dead
TCGA-UB-A7ME	51	MALE	Stage I	1.33151	Alive
TCGA-XR-A8TF	74	MALE	Stage I	1.89863	Dead
TCGA-K7-A6G5	66	MALE	Stage I	1.40274	Alive
TCGA-DD-A39Y	67	MALE	Stage I	0.468493	Dead
TCGA-DD-A1E9	70	MALE	Stage I	7.5589	Dead
TCGA-DD-A1EC	20	FEMALE	Stage I	1.64932	Alive
TCGA-HP-A5MZ	78	MALE	Stage I	0.249315	Dead
TCGA-DD-AAE2	51	MALE	Stage I	1.74795	Alive
TCGA-NI-A8LF	74	MALE	Stage I	2.18904	Alive
TCGA-DD-A1EF	57	FEMALE	Stage I	1.07945	Dead
TCGA-GJ-A3OU	59	MALE	Stage I	2.40822	Alive
TCGA-DD-AAD3	43	MALE	Stage I	3.54795	Alive
TCGA-2Y-A9GU	55	FEMALE	Stage I	5.31233	Alive
TCGA-DD-AACA	65	MALE	Stage I	6.30411	Alive
TCGA-DD-AAW2	69	MALE	Stage I	5.08219	Alive
TCGA-DD-AADD	51	MALE	Stage I	3.3726	Alive
TCGA-XR-A8TG	58	MALE	Stage I	2.46027	Alive
TCGA-UB-AA0V	69	FEMALE	Stage I	0.860274	Alive
TCGA-BC-A69I	69	MALE	Stage I	1.06027	Alive
TCGA-DD-AAE3	50	MALE	Stage I	1.55068	Alive
TCGA-EP-A3JL	76	MALE	Stage I	0.830137	Alive
TCGA-G3-A25Z	58	MALE	Stage I	1.79452	Alive
TCGA-DD-AAE6	59	FEMALE	Stage I	0.386301	Alive
TCGA-EP-A2KC	62	MALE	Stage I	0.0520548	Dead
TCGA-DD-AADN	59	MALE	Stage I	2.46027	Alive
TCGA-DD-AADR	58	MALE	Stage I	5.55616	Alive
TCGA-G3-A3CG	80	MALE	Stage I	1.84384	Alive
TCGA-DD-AACB	74	FEMALE	Stage I	6.36712	Alive
TCGA-DD-AAEE	55	MALE	Stage I	2.21918	Alive
TCGA-RC-A7SK	59	MALE	Stage I	1.29315	Alive
TCGA-DD-AACL	66	FEMALE	Stage I	0.293151	Dead
TCGA-DD-AACE	62	MALE	Stage I	5.98356	Alive
TCGA-DD-A4NR	85	FEMALE	Stage I	0.0246575	Dead
TCGA-BC-A10Z	62	FEMALE	Stage I	0.0931507	Dead
TCGA-DD-AACK	70	MALE	Stage I	0.0246575	Alive
TCGA-DD-AAW3	69	MALE	Stage I	4.47397	Alive
TCGA-DD-A73F	77	FEMALE	Stage I	2.9726	Alive
TCGA-DD-AACS	39	MALE	Stage I	4.94247	Alive
TCGA-2Y-A9H2	64	FEMALE	Stage I	4.74247	Alive
TCGA-DD-AAEG	59	FEMALE	Stage I	1.96986	Alive
TCGA-DD-AACO	40	MALE	Stage I	5.13973	Alive
TCGA-DD-AAVS	56	MALE	Stage I	4.99452	Alive
TCGA-XR-A8TC	43	FEMALE	Stage I	3.66849	Alive
TCGA-DD-AAVZ	38	MALE	Stage I	5.20548	Alive
TCGA-EP-A2KB	46	FEMALE	Stage I	1.63288	Dead
TCGA-G3-AAUZ	48	MALE	Stage I	1.31507	Alive
TCGA-DD-A11D	57	FEMALE	Stage I	4.27397	Dead
TCGA-DD-AACF	68	MALE	Stage I	1	Dead
TCGA-BD-A3EP	75	FEMALE	Stage I	1.12055	Alive
TCGA-DD-A11A	67	MALE	Stage I	0.216438	Alive
TCGA-DD-AADL	58	MALE	Stage I	1.74247	Alive
TCGA-2Y-A9H6	68	FEMALE	Stage I	0.978082	Alive
TCGA-DD-A73E	66	MALE	Stage I	0.120548	Alive
TCGA-RC-A7SF	66	MALE	Stage I	1.5863	Alive
TCGA-DD-AAVP	48	MALE	Stage I	7.53973	Alive
TCGA-DD-AACW	43	MALE	Stage I	3.90137	Alive
TCGA-G3-A7M5	76	MALE	Stage I	1.22466	Alive
TCGA-FV-A3R2	75	MALE	Stage I	0.531507	Dead
TCGA-DD-AADY	55	FEMALE	Stage I	1.52055	Alive
TCGA-DD-AACY	61	MALE	Stage I	3.9726	Alive
TCGA-DD-A1EI	46	MALE	Stage I	0.50137	Alive
TCGA-2Y-A9HB	66	MALE	Stage I	0.712329	Alive
TCGA-ES-A2HS	80	MALE	Stage I	1.88493	Dead
TCGA-FV-A2QQ	80	MALE	Stage I	1.99726	Alive
TCGA-DD-AACU	59	MALE	Stage I	4.29315	Alive
TCGA-DD-AACT	69	FEMALE	Stage I	4.27945	Alive
TCGA-FV-A2QR	75	MALE	Stage I	1.59178	Dead
TCGA-DD-A1EB	72	FEMALE	Stage I	5.52603	Alive
TCGA-DD-AAVQ	38	MALE	Stage I	7.47397	Alive
TCGA-G3-A25U	63	FEMALE	Stage I	4.48219	Alive
TCGA-G3-A7M8	31	MALE	Stage I	1.17808	Alive
TCGA-DD-AACZ	63	FEMALE	Stage I	0.468493	Dead
TCGA-MI-A75C	64	MALE	Stage I	0.79726	Alive
TCGA-DD-A4NP	32	MALE	Stage I	9.06301	Alive
TCGA-DD-AADF	64	FEMALE	Stage I	0.315068	Dead
TCGA-DD-AAEA	65	MALE	Stage I	1.57534	Alive
TCGA-G3-A5SJ	59	MALE	Stage I	1.91233	Alive
TCGA-DD-AAD0	73	FEMALE	Stage I	0.375342	Alive
TCGA-DD-AAEI	72	MALE	Stage I	4.19452	Alive
TCGA-2Y-A9GT	51	MALE	Stage I	4.44932	Dead
TCGA-2Y-A9H4	68	MALE	Stage I	3.97808	Alive
TCGA-DD-AACD	48	MALE	Stage I	1.04384	Dead
TCGA-2Y-A9GV	54	FEMALE	Stage I	6.93699	Dead
TCGA-DD-AADJ	70	FEMALE	Stage I	2.92055	Alive
TCGA-G3-AAV0	58	MALE	Stage I	1.30411	Alive
TCGA-DD-AAC8	72	MALE	Stage I	0.0438356	Dead
TCGA-WJ-A86L	68	FEMALE	Stage I	0.945205	Alive
TCGA-G3-A7M7	65	MALE	Stage I	0.989041	Alive
TCGA-DD-AADC	53	MALE	Stage I	1.16438	Dead
TCGA-DD-AACC	61	MALE	Stage I	4.61644	Dead
TCGA-WX-AA44	64	FEMALE	Stage I	1.68493	Alive
TCGA-DD-AAD5	54	MALE	Stage I	3.68493	Alive
TCGA-2Y-A9H7	81	FEMALE	Stage I	3.2	Alive
TCGA-DD-A4NO	65	MALE	Stage I	6.15068	Alive
TCGA-G3-A25Y	52	FEMALE	Stage I	1.23836	Dead
TCGA-BC-A3KF	66	FEMALE	Stage I	0.0219178	Alive
TCGA-DD-AAVR	44	MALE	Stage I	6.88493	Alive
TCGA-ES-A2HT	54	MALE	Stage I	1.2	Dead
TCGA-DD-AADI	43	FEMALE	Stage I	2.9726	Alive
TCGA-DD-AADW	48	MALE	Stage I	1.60822	Alive
TCGA-FV-A4ZQ	52	MALE	Stage I	0.0328767	Alive
TCGA-DD-AAW0	54	MALE	Stage I	5.52055	Alive
TCGA-DD-A73G	73	FEMALE	Stage I	9.52877	Alive
TCGA-DD-A11B	73	MALE	Stage I	0.0383562	Dead
TCGA-DD-AADS	63	MALE	Stage I	1.29863	Alive
TCGA-MR-A520	58	MALE	Stage I	0.627397	Alive
TCGA-FV-A496	84	FEMALE	Stage I	0.0273973	Alive
TCGA-DD-AA3A	81	FEMALE	Stage I	1.12329	Dead
TCGA-DD-A73A	71	MALE	Stage I	1.99452	Alive
TCGA-BW-A5NQ	63	MALE	Stage I	0	Alive
TCGA-DD-A4NB	25	MALE	Stage I	2.70959	Alive
TCGA-DD-AADO	55	MALE	Stage I	1.2411	Alive
TCGA-FV-A3R3	38	FEMALE	Stage I	1.00274	Dead
TCGA-DD-AAD2	66	MALE	Stage I	1.80274	Alive
TCGA-DD-A1EG	76	MALE	Stage I	3.7589	Dead
TCGA-G3-A3CI	71	MALE	Stage I	0.493151	Alive
TCGA-DD-AAD1	51	FEMALE	Stage I	1.54521	Alive
TCGA-DD-A11C	69	MALE	Stage I	1.8137	Alive
TCGA-2Y-A9H5	59	FEMALE	Stage I	1.52055	Dead
TCGA-EP-A12J	62	MALE	Stage I	1.56164	Alive
TCGA-DD-AACP	64	MALE	Stage I	1.13699	Alive
TCGA-DD-A3A2	76	FEMALE	Stage I	5.83836	Dead
TCGA-DD-A3A0	70	MALE	Stage I	2.15068	Dead
TCGA-DD-A4ND	56	FEMALE	Stage I	7.52329	Alive
TCGA-DD-AAEB	60	MALE	Stage I	1.30959	Alive
TCGA-G3-A25S	64	MALE	Stage I	1.13973	Dead
TCGA-DD-AAE4	49	FEMALE	Stage I	1.66575	Alive
TCGA-DD-AAD8	73	FEMALE	Stage I	3.33973	Alive
TCGA-DD-AAE9	69	MALE	Stage I	1.97808	Alive
TCGA-DD-AADA	66	FEMALE	Stage I	3.37808	Alive
TCGA-DD-A39X	78	FEMALE	Stage I	4.6411	Dead
TCGA-DD-AADE	50	MALE	Stage I	3.29315	Alive
TCGA-K7-A5RG	66	MALE	Stage I	1.42192	Alive
TCGA-DD-AAVW	35	MALE	Stage I	6.34795	Alive
TCGA-MR-A8JO	34	MALE	Stage I	0.90411	Alive
TCGA-DD-AAE1	52	MALE	Stage I	1.51233	Alive
TCGA-DD-A4NN	56	FEMALE	Stage I	2.46301	Dead
TCGA-G3-A3CK	61	MALE	Stage I	1.60274	Alive
TCGA-EP-A26S	70	MALE	Stage I	1.66575	Alive
TCGA-2Y-A9GX	68	MALE	Stage I	6.69041	Alive
TCGA-RC-A7S9	47	FEMALE	Stage I	1.75342	Alive
TCGA-DD-A3A3	45	MALE	Stage I	1.46575	Dead
TCGA-O8-A75V	54	MALE	Stage I	1.47397	Alive
TCGA-K7-A5RF	64	MALE	Stage I	1.72877	Alive
TCGA-G3-A5SK	58	MALE	Stage I	2.03836	Alive
TCGA-DD-A1ED	68	MALE	Stage I	6.30411	Alive
TCGA-DD-AACV	53	MALE	Stage I	4.19452	Alive
TCGA-2Y-A9H1	58	MALE	Stage I	3.36712	Dead
TCGA-DD-A4NF	72	MALE	Stage I	2.58082	Alive
TCGA-KR-A7K2	64	MALE	Stage I	2.27123	Alive
TCGA-DD-AAC9	51	MALE	Stage I	0.950685	Alive
TCGA-DD-AACN	32	MALE	Stage I	3.56712	Alive
TCGA-DD-AAE8	45	MALE	Stage I	1.81918	Alive
TCGA-DD-AADV	50	MALE	Stage I	1.5726	Alive
TCGA-G3-A7M6	60	FEMALE	Stage I	1.73151	Alive
TCGA-KR-A7K8	57	MALE	Stage I	2.48219	Alive
TCGA-DD-A1EA	68	MALE	Stage II	6.61644	Alive
TCGA-G3-AAV7	38	MALE	Stage II	0.989041	Alive
TCGA-5C-AAPD	61	MALE	Stage II	0.0547945	Alive
TCGA-DD-A113	55	FEMALE	Stage II	6.64384	Alive
TCGA-ED-A5KG	60	FEMALE	Stage II	2.33973	Alive
TCGA-DD-A39V	77	MALE	Stage II	1.76164	Dead
TCGA-ZS-A9CD	73	MALE	Stage II	3.79726	Dead
TCGA-CC-5261	44	MALE	Stage II	0.265753	Dead
TCGA-4R-AA8I	66	MALE	Stage II	0.717808	Dead
TCGA-DD-AADQ	59	MALE	Stage II	1.19452	Alive
TCGA-DD-AAVU	46	MALE	Stage II	6.03288	Alive
TCGA-MI-A75G	63	MALE	Stage II	1.91233	Alive
TCGA-G3-A25X	73	MALE	Stage II	4.87397	Alive
TCGA-DD-AACX	66	MALE	Stage II	0.465753	Alive
TCGA-UB-AA0U	60	MALE	Stage II	0.89589	Alive
TCGA-RG-A7D4	69	MALE	Stage II	3.00822	Alive
TCGA-DD-AAVX	38	MALE	Stage II	4.70685	Alive
TCGA-CC-A7IJ	56	MALE	Stage II	1.04658	Alive
TCGA-RC-A6M3	24	MALE	Stage II	0	Alive
TCGA-DD-A1EL	23	MALE	Stage II	1.13699	Dead
TCGA-CC-5258	48	MALE	Stage II	0.353425	Dead
TCGA-ED-A7PY	20	FEMALE	Stage II	1.06849	Alive
TCGA-DD-AADU	60	MALE	Stage II	1.51781	Alive
TCGA-DD-AAEK	51	MALE	Stage II	2.92329	Alive
TCGA-2Y-A9GZ	82	FEMALE	Stage II	2.32329	Dead
TCGA-G3-A3CJ	52	MALE	Stage II	1.6274	Alive
TCGA-ED-A7PZ	61	MALE	Stage II	0.0164384	Alive
TCGA-DD-AACI	69	MALE	Stage II	4.43288	Alive
TCGA-DD-A114	42	MALE	Stage II	3.14795	Dead
TCGA-ZS-A9CF	64	MALE	Stage II	6.60822	Alive
TCGA-RC-A6M6	75	MALE	Stage II	0.0246575	Alive
TCGA-5R-AA1C	57	MALE	Stage II	1.42466	Alive
TCGA-ZS-A9CE	79	FEMALE	Stage II	3.4	Alive
TCGA-BC-A69H	64	MALE	Stage II	1.21644	Alive
TCGA-G3-A5SL	70	MALE	Stage II	1.70137	Alive
TCGA-ED-A7XP	53	FEMALE	Stage II	1.09589	Alive
TCGA-DD-A4NI	67	MALE	Stage II	2.23562	Alive
TCGA-WQ-AB4B	62	MALE	Stage II	1.08219	Alive
TCGA-DD-AACM	48	MALE	Stage II	4.84658	Alive
TCGA-ED-A4XI	58	MALE	Stage II	2.24384	Alive
TCGA-QA-A7B7	48	MALE	Stage II	0.257534	Alive
TCGA-2Y-A9GY	64	FEMALE	Stage II	2.07397	Dead
TCGA-BC-A3KG	68	FEMALE	Stage II	1.86301	Alive
TCGA-ED-A459	47	MALE	Stage II	2.49315	Alive
TCGA-BD-A3ER	62	MALE	Stage II	3.05479	Alive
TCGA-G3-A5SM	58	MALE	Stage II	1.42466	Alive
TCGA-RC-A7SH	42	MALE	Stage II	1.28219	Alive
TCGA-DD-A73D	68	FEMALE	Stage II	1.89863	Alive
TCGA-DD-AADK	68	FEMALE	Stage II	2.87397	Alive
TCGA-CC-A7IG	47	MALE	Stage II	0.819178	Dead
TCGA-DD-A118	77	FEMALE	Stage II	9.41644	Alive
TCGA-5R-AAAM	65	FEMALE	Stage II	0.126027	Dead
TCGA-BC-A217	75	FEMALE	Stage II	3.8274	Dead
TCGA-FV-A495	51	FEMALE	Stage II	0.00273973	Alive
TCGA-FV-A23B	70	FEMALE	Stage II	5.07397	Dead
TCGA-FV-A3I0	76	FEMALE	Stage II	2.32329	Alive
TCGA-UB-A7MB	24	MALE	Stage II	1.64658	Alive
TCGA-LG-A6GG	79	FEMALE	Stage II	1.06027	Alive
TCGA-DD-AACQ	50	MALE	Stage II	1.18356	Dead
TCGA-KR-A7K7	61	FEMALE	Stage II	2.60548	Alive
TCGA-DD-A4NJ	54	FEMALE	Stage II	2.54247	Alive
TCGA-DD-AAVV	56	MALE	Stage II	6.72603	Alive
TCGA-2Y-A9HA	70	MALE	Stage II	0.0986301	Dead
TCGA-DD-A39Z	43	FEMALE	Stage II	1.64658	Dead
TCGA-CC-A9FS	55	MALE	Stage II	0.578082	Alive
TCGA-UB-A7MA	62	FEMALE	Stage II	2.32329	Alive
TCGA-ZS-A9CG	55	MALE	Stage II	0.934247	Alive
TCGA-DD-AADM	58	MALE	Stage II	0.0328767	Dead
TCGA-K7-AAU7	61	MALE	Stage II	0.983562	Alive
TCGA-WX-AA46	61	MALE	Stage II	2.07123	Alive
TCGA-5C-A9VG	58	MALE	Stage II	0.89863	Alive
TCGA-RC-A7SB	53	MALE	Stage II	1.61096	Alive
TCGA-2Y-A9H3	45	MALE	Stage II	4.15342	Alive
TCGA-G3-AAV5	67	MALE	Stage II	0.969863	Alive
TCGA-DD-AACH	69	MALE	Stage II	0.534247	Dead
TCGA-G3-A5SI	44	MALE	Stage II	2.10411	Dead
TCGA-CC-A8HV	51	FEMALE	Stage II	0.764384	Dead
TCGA-DD-A3A6	72	FEMALE	Stage II	8.92603	Dead
TCGA-DD-A4NQ	60	MALE	Stage II	1.02192	Dead
TCGA-G3-AAV3	58	FEMALE	Stage II	1.12877	Alive
TCGA-DD-AACG	52	MALE	Stage II	1.28493	Dead
TCGA-DD-AACJ	75	MALE	Stage II	5.7589	Alive
TCGA-GJ-A6C0	75	FEMALE	Stage II	0.0849315	Dead
TCGA-FV-A3I1	81	FEMALE	Stage II	0.676712	Dead
TCGA-ED-A7PX	48	FEMALE	Stage II	0.0164384	Alive
TCGA-DD-A3A8	75	MALE	Stage II	0.030137	Dead
TCGA-DD-A39W	29	FEMALE	Stage III	2.26575	Dead
TCGA-DD-A3A5	66	FEMALE	Stage III	8.56164	Dead
TCGA-DD-A1EH	23	MALE	Stage III	4.09589	Alive
TCGA-CC-A5UC	63	MALE	Stage III	0.950685	Dead
TCGA-DD-AAE0	45	FEMALE	Stage III	1.52055	Alive
TCGA-CC-A3M9	45	MALE	Stage III	0.821918	Dead
TCGA-DD-A3A4	37	MALE	Stage III	1.67671	Dead
TCGA-DD-AAW1	55	MALE	Stage III	5.44932	Alive
TCGA-EP-A2KA	52	FEMALE	Stage III	1.71781	Dead
TCGA-UB-A7MC	59	MALE	Stage III	1.36986	Alive
TCGA-CC-A7IF	59	MALE	Stage III	1.77808	Dead
TCGA-DD-A73C	65	FEMALE	Stage III	1.92055	Alive
TCGA-ED-A97K	54	MALE	Stage III	0.0164384	Alive
TCGA-CC-A7II	54	MALE	Stage III	1.09315	Alive
TCGA-CC-5264	71	MALE	Stage III	0.279452	Dead
TCGA-ED-A8O6	50	FEMALE	Stage III	0.153425	Dead
TCGA-DD-A115	53	MALE	Stage III	6.96438	Dead
TCGA-BW-A5NO	50	MALE	Stage III	0.0547945	Alive
TCGA-CC-A5UD	45	MALE	Stage III	0.832877	Dead
TCGA-CC-A9FU	52	FEMALE	Stage III	0	Alive
TCGA-FV-A4ZP	78	MALE	Stage III	6.81096	Dead
TCGA-CC-A7IE	57	MALE	Stage III	0.594521	Dead
TCGA-CC-A1HT	50	MALE	Stage III	0.276712	Dead
TCGA-CC-A7IL	61	MALE	Stage III	0.761644	Dead
TCGA-CC-5263	35	MALE	Stage III	0.353425	Dead
TCGA-DD-A4NV	61	MALE	Stage III	6.56986	Alive
TCGA-DD-A4NK	80	FEMALE	Stage III	3.31507	Dead
TCGA-CC-A9FW	68	MALE	Stage III	0.679452	Alive
TCGA-CC-A8HU	39	FEMALE	Stage III	0.942466	Dead
TCGA-UB-A7MF	56	MALE	Stage III	0.586301	Dead
TCGA-ED-A66Y	51	FEMALE	Stage III	0.810959	Dead
TCGA-DD-A116	68	MALE	Stage III	4.44384	Dead
TCGA-CC-A9FV	57	MALE	Stage III	0	Alive
TCGA-CC-A3MC	54	MALE	Stage III	0.994521	Alive
TCGA-CC-A123	24	FEMALE	Stage III	0.6	Alive
TCGA-XR-A8TE	16	MALE	Stage III	2.53425	Alive
TCGA-CC-A8HT	74	MALE	Stage III	0.383562	Dead
TCGA-DD-AADG	70	MALE	Stage III	3.13699	Alive
TCGA-2Y-A9H0	49	MALE	Stage III	10.0685	Alive
TCGA-G3-AAV6	53	FEMALE	Stage III	0.178082	Dead
TCGA-DD-A4NE	75	FEMALE	Stage III	1.80822	Dead
TCGA-ED-A7XO	29	MALE	Stage III	1.16986	Alive
TCGA-EP-A3RK	73	MALE	Stage III	0.994521	Alive
TCGA-BC-4072	74	FEMALE	Stage III	4.08219	Dead
TCGA-ED-A82E	60	FEMALE	Stage III	1.11781	Alive
TCGA-BC-A5W4	69	MALE	Stage III	1.49863	Dead
TCGA-CC-A3MB	36	MALE	Stage III	0.863014	Dead
TCGA-G3-A25T	45	FEMALE	Stage III	4.25479	Alive
TCGA-G3-A3CH	53	MALE	Stage III	2.13699	Alive
TCGA-BC-4073	73	MALE	Stage III	2.32603	Alive
TCGA-DD-A4NG	77	MALE	Stage III	2.19726	Dead
TCGA-DD-AAVY	56	MALE	Stage III	5.39726	Alive
TCGA-CC-A7IK	59	MALE	Stage III	0.717808	Dead
TCGA-ED-A8O5	59	FEMALE	Stage III	1.11233	Alive
TCGA-ED-A66X	35	MALE	Stage III	1.11233	Alive
TCGA-BC-A10X	52	FEMALE	Stage III	2.10959	Dead
TCGA-LG-A9QD	68	MALE	Stage III	1.00274	Alive
TCGA-WX-AA47	33	FEMALE	Stage III	1.52329	Dead
TCGA-NI-A4U2	71	MALE	Stage III	4.90685	Dead
TCGA-BC-A216	62	FEMALE	Stage III	3.70137	Alive
TCGA-CC-A7IH	58	MALE	Stage III	1	Alive
TCGA-YA-A8S7	68	MALE	Stage III	1.12877	Dead
TCGA-DD-A1EE	73	MALE	Stage III	0.956164	Dead
TCGA-RC-A6M4	74	FEMALE	Stage III	0.060274	Alive
TCGA-DD-AAD6	66	MALE	Stage III	1.8411	Alive
TCGA-CC-A3MA	61	MALE	Stage III	0.830137	Dead
TCGA-DD-A3A1	65	MALE	Stage III	0.638356	Dead
TCGA-5R-AA1D	17	FEMALE	Stage III	1.23014	Alive
TCGA-CC-A5UE	48	MALE	Stage III	0.745205	Dead
TCGA-G3-A6UC	65	MALE	Stage III	1.83836	Alive
TCGA-PD-A5DF	58	FEMALE	Stage III	1.75068	Dead
TCGA-DD-A4NH	65	FEMALE	Stage III	2.51233	Alive
TCGA-3K-AAZ8	65	MALE	Stage III	1.08493	Alive
TCGA-XR-A8TD	49	FEMALE	Stage III	2.82192	Alive
TCGA-G3-A25W	79	FEMALE	Stage III	2.56164	Alive
TCGA-DD-A3A7	67	MALE	Stage III	1.14795	Dead
TCGA-G3-A7M9	70	MALE	Stage III	0.153425	Dead
TCGA-CC-5259	60	FEMALE	Stage III	0.684932	Alive
TCGA-BC-A8YO	66	FEMALE	Stage III	1.53973	Alive
TCGA-CC-5262	67	MALE	Stage III	0.282192	Dead
TCGA-DD-A4NA	67	FEMALE	Stage III	2.76164	Alive
TCGA-MI-A75E	61	MALE	Stage III	1.38904	Alive
TCGA-G3-AAV1	51	MALE	Stage III	0.983562	Dead
TCGA-CC-5260	61	FEMALE	Stage III	0.238356	Dead
TCGA-DD-A1EJ	71	FEMALE	Stage III	2.75342	Dead
TCGA-CC-A8HS	18	MALE	Stage III	0.821918	Dead
TCGA-DD-A119	40	MALE	Stage IV	0.610959	Dead
TCGA-BW-A5NP	26	FEMALE	Stage IV	0	Alive
TCGA-RC-A6M5	20	FEMALE	Stage IV	0.0410959	Alive
TCGA-DD-A1EK	64	FEMALE	Stage IV	1.52877	Dead
TCGA-DD-A3A9	64	FEMALE	Stage IV	2.55068	Dead
TCGA-BC-A10U	69	MALE	unknow	2.29315	Dead
TCGA-BC-A10S	81	MALE	unknow	3.89863	Dead
TCGA-ZP-A9D1	56	FEMALE	unknow	0.0575342	Alive
TCGA-WQ-A9G7	71	FEMALE	unknow	0.0821918	Alive
TCGA-MI-A75I	61	MALE	unknow	1.72603	Alive
TCGA-T1-A6J8	68	MALE	unknow	0.0630137	Alive
TCGA-BD-A2L6	69	MALE	unknow	3.73425	Alive
TCGA-BC-A10Y	76	MALE	unknow	1.94795	Dead
TCGA-BC-A10W	50	MALE	unknow	0.249315	Dead
TCGA-BC-A10T	76	MALE	unknow	2.29315	Dead
TCGA-BC-A110	51	FEMALE	unknow	5.79726	Dead
TCGA-ZP-A9CY	66	FEMALE	unknow	2.14247	Alive
TCGA-ZP-A9D4	64	FEMALE	unknow	1.08219	Alive
TCGA-ZP-A9D2	51	MALE	unknow	2.09589	Dead
TCGA-ZP-A9CZ	72	MALE	unknow	1.93425	Alive
TCGA-MI-A75H	77	MALE	unknow	2.04658	Alive
TCGA-BC-A112	80	MALE	unknow	0.419178	Dead
TCGA-HP-A5N0	90	FEMALE	unknow	2.06027	Dead
TCGA-BC-A10R	66	FEMALE	unknow	0.843836	Dead
TCGA-2Y-A9H8	85	FEMALE	unknow	1.73425	Dead
TCGA-ZP-A9D0	67	FEMALE	unknow	2.98904	Alive
TCGA-ZP-A9CV	59	MALE	unknow	2.98082	Dead
TCGA-BC-A10Q	72	FEMALE	unknow	3.10959	Dead
TCGA-2Y-A9GS	58	MALE	unknow	1.98356	Dead
GSM362949	37	MALE	unknow	18.2	Dead
GSM363070	50	MALE	unknow	57	Alive
GSM363368	66	MALE	unknow	15.4	Dead
GSM363420	72	MALE	unknow	7.3	Dead
GSM363422	67	MALE	unknow	51.6	Alive
GSM363424	43	MALE	unknow	63.8	Alive
GSM363426	33	MALE	unknow	1.8	Dead
GSM363428	76	MALE	unknow	3.8	Dead
GSM363430	47	MALE	unknow	3.7	Dead
GSM363432	41	MALE	unknow	34.4	Dead
GSM363436	48	MALE	unknow	3.8	Dead
GSM363438	55	MALE	unknow	56.6	Alive
GSM363440	73	MALE	unknow	55.5	Alive
GSM363442	42	MALE	unknow	4.6	Dead
GSM363444	46	MALE	unknow	7.3	Dead
GSM363446	50	MALE	unknow	52.1	Alive
GSM363448	60	FEMALE	unknow	51.7	Alive
GSM362964	50	MALE	Stage I	67.4	Alive
GSM363215	48	MALE	Stage I	18.6	Alive
GSM362970	39	MALE	Stage I	67.3	Alive
GSM362976	50	MALE	Stage I	67	Alive
GSM362959	45	MALE	Stage I	9.5	Dead
GSM363115	74	MALE	Stage I	66.6	Alive
GSM362971	52	MALE	Stage I	48.1	Dead
GSM363371	69	FEMALE	Stage I	66.3	Alive
GSM362977	41	MALE	Stage I	66.3	Alive
GSM362966	58	MALE	Stage I	66.1	Alive
GSM362972	45	MALE	Stage I	66	Alive
GSM362978	61	MALE	Stage I	28.8	Dead
GSM363337	53	FEMALE	Stage I	65.5	Alive
GSM363343	30	FEMALE	Stage I	65.1	Alive
GSM363291	54	MALE	Stage I	50.1	Dead
GSM362982	39	MALE	Stage I	64.6	Alive
GSM362992	41	FEMALE	Stage I	64.3	Alive
GSM362983	32	MALE	Stage I	64.2	Alive
GSM363145	43	MALE	Stage I	33	Dead
GSM362993	50	MALE	Stage I	3.8	Alive
GSM363029	48	MALE	Stage I	51.3	Alive
GSM362988	52	FEMALE	Stage I	51.1	Alive
GSM363348	41	MALE	Stage I	14.3	Alive
GSM363350	43	MALE	Stage I	62.9	Alive
GSM363176	65	FEMALE	Stage I	50.7	Alive
GSM363317	58	MALE	Stage I	62.8	Alive
GSM363326	37	MALE	Stage I	37.2	Dead
GSM363084	67	MALE	Stage I	62.6	Alive
GSM363033	63	MALE	Stage I	36.4	Dead
GSM363049	45	MALE	Stage I	62.4	Alive
GSM363010	47	MALE	Stage I	62	Alive
GSM363149	53	MALE	Stage I	14.4	Alive
GSM363293	54	MALE	Stage I	61.5	Alive
GSM363376	62	MALE	Stage I	61.5	Alive
GSM363378	47	MALE	Stage I	31.9	Dead
GSM363037	54	MALE	Stage I	61.2	Alive
GSM363034	30	FEMALE	Stage I	45.9	Dead
GSM363336	63	MALE	Stage I	8	Dead
GSM363209	45	FEMALE	Stage I	60.8	Alive
GSM363014	61	MALE	Stage I	60.7	Alive
GSM363330	50	MALE	Stage I	12.6	Dead
GSM363288	56	MALE	Stage I	60.3	Alive
GSM363327	52	MALE	Stage I	60.1	Alive
GSM363202	33	MALE	Stage I	60	Alive
GSM363292	53	MALE	Stage I	59.9	Alive
GSM363331	54	FEMALE	Stage I	36.5	Dead
GSM363015	39	MALE	Stage I	59.7	Alive
GSM363335	45	MALE	Stage I	59.4	Alive
GSM363332	54	MALE	Stage I	12.6	Dead
GSM363072	49	MALE	Stage I	10.4	Alive
GSM363273	56	MALE	Stage I	58	Alive
GSM363205	70	MALE	Stage I	58	Alive
GSM363198	41	MALE	Stage I	57.9	Alive
GSM363224	70	MALE	Stage I	57.9	Alive
GSM363196	42	MALE	Stage I	57.7	Alive
GSM362950	45	MALE	Stage I	57.5	Alive
GSM363237	69	MALE	Stage I	57.5	Alive
GSM363388	58	FEMALE	Stage I	57.3	Alive
GSM363354	66	MALE	Stage I	10.4	Dead
GSM363053	57	FEMALE	Stage I	57	Alive
GSM363207	53	MALE	Stage I	53.3	Dead
GSM363222	59	MALE	Stage I	48.4	Alive
GSM363101	50	MALE	Stage I	56.3	Alive
GSM363035	40	MALE	Stage I	56.1	Alive
GSM363268	56	MALE	Stage I	56	Alive
GSM363055	55	FEMALE	Stage I	7.3	Alive
GSM363243	69	MALE	Stage I	55.8	Alive
GSM363328	63	MALE	Stage I	12	Dead
GSM363122	49	MALE	Stage I	55.4	Alive
GSM363164	27	FEMALE	Stage I	55.2	Alive
GSM363295	63	MALE	Stage I	54.9	Alive
GSM363269	55	MALE	Stage I	52.7	Dead
GSM363316	35	FEMALE	Stage I	54.7	Alive
GSM363290	63	FEMALE	Stage I	54.7	Alive
GSM363107	71	FEMALE	Stage I	7	Dead
GSM363289	46	MALE	Stage I	54.2	Alive
GSM362952	61	MALE	Stage I	54.3	Alive
GSM363241	55	MALE	Stage I	54.2	Alive
GSM363104	59	MALE	Stage I	35.9	Dead
GSM362954	40	MALE	Stage I	5.5	Alive
GSM363087	40	MALE	Stage I	54	Alive
GSM363298	52	MALE	Stage I	53.6	Alive
GSM363124	67	MALE	Stage I	53.5	Alive
GSM363360	71	MALE	Stage I	53.3	Alive
GSM363170	59	MALE	Stage I	53.3	Alive
GSM363083	45	MALE	Stage I	53.3	Alive
GSM363329	56	MALE	Stage I	53.2	Alive
GSM363012	61	MALE	Stage I	4.5	Dead
GSM363247	44	MALE	Stage I	52.9	Alive
GSM363039	54	MALE	Stage I	52.8	Alive
GSM363364	49	MALE	Stage I	27.1	Dead
GSM363077	40	MALE	Stage I	52.7	Alive
GSM363182	50	MALE	Stage I	52.7	Alive
GSM363144	72	MALE	Stage I	51.1	Alive
GSM363366	73	MALE	Stage I	52.3	Alive
GSM363192	50	MALE	Stage I	52.2	Alive
GSM363130	72	MALE	Stage II	61.8	Alive
GSM362958	56	MALE	Stage II	28.2	Dead
GSM363013	58	MALE	Stage II	7.7	Dead
GSM363310	41	MALE	Stage II	23.5	Dead
GSM363174	48	MALE	Stage II	67.1	Alive
GSM363151	70	FEMALE	Stage II	67.1	Alive
GSM363142	28	MALE	Stage II	46.1	Dead
GSM362965	57	MALE	Stage II	66.6	Alive
GSM363267	54	MALE	Stage II	47.9	Dead
GSM362960	21	MALE	Stage II	66.1	Alive
GSM363038	41	MALE	Stage II	15.1	Dead
GSM363339	49	FEMALE	Stage II	65.4	Alive
GSM363194	44	MALE	Stage II	4.5	Alive
GSM363341	32	MALE	Stage II	65.4	Alive
GSM363315	43	MALE	Stage II	65.4	Alive
GSM363265	41	MALE	Stage II	65.1	Alive
GSM363011	57	MALE	Stage II	17.6	Dead
GSM362986	55	MALE	Stage II	64.5	Alive
GSM363128	36	MALE	Stage II	30.1	Dead
GSM362987	60	MALE	Stage II	60.4	Alive
GSM362984	49	MALE	Stage II	51.4	Alive
GSM363127	55	MALE	Stage II	22.2	Dead
GSM362994	49	MALE	Stage II	54.8	Alive
GSM363344	52	FEMALE	Stage II	38.7	Alive
GSM363057	63	MALE	Stage II	60.5	Dead
GSM363239	54	MALE	Stage II	42.2	Dead
GSM363294	25	MALE	Stage II	62.6	Alive
GSM363073	41	MALE	Stage II	26.5	Dead
GSM362948	37	MALE	Stage II	61.4	Alive
GSM363125	43	MALE	Stage II	16.5	Dead
GSM363172	67	MALE	Stage II	6.7	Dead
GSM363108	49	MALE	Stage II	48.8	Alive
GSM363313	71	MALE	Stage II	36.6	Alive
GSM363086	44	MALE	Stage II	60.5	Alive
GSM363274	53	MALE	Stage II	26.9	Dead
GSM363384	43	MALE	Stage II	51.6	Dead
GSM363190	41	MALE	Stage II	4.8	Alive
GSM363249	60	FEMALE	Stage II	59.2	Alive
GSM363186	45	MALE	Stage II	7.6	Dead
GSM363009	50	MALE	Stage II	58.9	Alive
GSM363008	50	FEMALE	Stage II	58.4	Alive
GSM363105	36	MALE	Stage II	9.5	Alive
GSM363296	52	FEMALE	Stage II	27.5	Dead
GSM363232	49	MALE	Stage II	57.9	Alive
GSM363352	51	MALE	Stage II	16.2	Dead
GSM363074	41	MALE	Stage II	57.7	Alive
GSM363213	50	MALE	Stage II	57.6	Alive
GSM363178	42	MALE	Stage II	57.3	Alive
GSM363391	55	MALE	Stage II	57.3	Alive
GSM363188	35	MALE	Stage II	57.3	Alive
GSM363314	48	FEMALE	Stage II	57.1	Alive
GSM363082	64	MALE	Stage II	57	Alive
GSM363098	60	MALE	Stage II	56.9	Alive
GSM363200	26	MALE	Stage II	23.9	Dead
GSM363272	65	MALE	Stage II	56.3	Alive
GSM363355	53	MALE	Stage II	9.1	Dead
GSM363400	58	MALE	Stage II	55.6	Alive
GSM363311	77	MALE	Stage II	19	Alive
GSM363312	53	FEMALE	Stage II	55.3	Alive
GSM363109	50	MALE	Stage II	55.2	Alive
GSM363102	49	MALE	Stage II	37.9	Dead
GSM363309	34	MALE	Stage II	53	Dead
GSM363333	48	MALE	Stage II	13.5	Dead
GSM363123	48	MALE	Stage II	42.7	Alive
GSM363357	47	FEMALE	Stage II	8.8	Dead
GSM363270	58	MALE	Stage II	21.3	Dead
GSM363143	48	FEMALE	Stage II	32.6	Dead
GSM363050	32	MALE	Stage II	54.2	Alive
GSM363358	56	MALE	Stage II	53.9	Alive
GSM363054	51	MALE	Stage II	53.8	Alive
GSM363230	40	MALE	Stage II	4.8	Alive
GSM363056	59	FEMALE	Stage II	19.2	Dead
GSM363362	53	MALE	Stage II	5.8	Dead
GSM363031	58	MALE	Stage II	52.8	Alive
GSM363148	64	MALE	Stage II	52.4	Alive
GSM363150	68	MALE	Stage II	3.3	Dead
GSM363036	65	MALE	Stage II	32.7	Dead
GSM363147	44	MALE	Stage II	28.7	Dead
GSM363099	50	MALE	Stage III	30.9	Dead
GSM363235	41	MALE	Stage III	32.8	Alive
GSM363264	43	MALE	Stage III	17.8	Dead
GSM363079	53	MALE	Stage III	7.8	Dead
GSM363184	34	MALE	Stage III	16.3	Alive
GSM363251	47	MALE	Stage III	19.6	Dead
GSM362947	67	MALE	Stage III	59.2	Dead
GSM363169	45	MALE	Stage III	39.4	Alive
GSM363211	61	MALE	Stage III	8.9	Dead
GSM363016	44	MALE	Stage III	2	Alive
GSM363152	39	MALE	Stage III	8.3	Dead
GSM363204	53	MALE	Stage III	14.1	Dead
GSM363069	34	MALE	Stage III	13.6	Dead
GSM363106	53	MALE	Stage III	14.6	Dead
GSM363180	52	MALE	Stage III	47.1	Dead
GSM363263	39	MALE	Stage III	3	Dead
GSM712542	61	MALE	Stage III	7.5	Dead
GSM363386	61	MALE	Stage III	10	Dead
GSM363245	47	MALE	Stage III	57.5	Alive
GSM363085	49	MALE	Stage III	54.8	Dead
GSM363030	58	MALE	Stage III	4.5	Dead
GSM363051	43	MALE	Stage III	20.6	Alive
GSM363393	46	MALE	Stage III	4	Dead
GSM363129	34	MALE	Stage III	3.5	Dead
GSM363081	34	MALE	Stage III	5.2	Dead
GSM363048	50	MALE	Stage III	20.3	Dead
GSM363404	46	MALE	Stage III	12	Dead
GSM363146	50	MALE	Stage III	54.9	Alive
GSM363052	46	MALE	Stage III	14.3	Dead
GSM363220	59	MALE	Stage III	54.2	Alive
GSM363168	51	MALE	Stage III	53.8	Alive
GSM362956	33	MALE	Stage III	13.3	Dead
GSM363297	58	FEMALE	Stage III	3	Alive
GSM363346	51	MALE	Stage III	14.3	Dead
GSM363218	48	MALE	Stage III	15.2	Dead
GSM363032	52	MALE	Stage III	24.9	Alive
GSM363075	54	FEMALE	Stage III	18	Dead
GSM363100	56	MALE	Stage III	3.4	Dead
GSM363078	47	MALE	Stage III	57.9	Dead
GSM363275	67	FEMALE	Stage III	59.8	Alive
GSM363126	65	MALE	Stage III	59.5	Alive
GSM363071	35	MALE	Stage III	13.8	Dead
GSM363017	50	MALE	Stage III	12.7	Dead
GSM363076	35	MALE	Stage III	23	Dead
GSM363080	49	MALE	Stage III	2.3	Dead
GSM363166	59	MALE	Stage III	53.8	Alive
GSM363266	35	MALE	Stage III	2.5	Dead
GSM363121	39	MALE	Stage III	51.2	Alive
GSM363226	54	MALE	Stage III	60.4	Alive
GSM363217	58	MALE	Stage III	54.5	Alive
GSM363271	52	MALE	Stage III	28.7	Alive
